# Supplementary material for: Integrative genomic and transcriptomic analyses of a bud sport mutant ‘Jinzao Wuhe’ with the phenotype of large berries in grapevines
Source: PeerJ. 2023 Jan 3;11:e14617. doi: 10.7717/peerj.14617 (PMC9817954; doi:10.7717/peerj.14617)
Supplement: Supplemental Information 3 [file peerj-11-14617-s003.xlsx]

## Sheet: Sheet1
Table S1: Determination of longitudinal diameter, transverse diameter, volume and weight at different periods of ‘Himord Seedless’ and ‘Jinzao Wuhe’
10 days post-anthesis						17 days post-anthesis						24 days post-anthesis						31 days post-anthesis						38 days post-anthesis						45 days post-anthesis						52 days post-anthesis						59 days post-anthesis
Grape Varieties	Samples	Longitudinal Diameter（mm）	Transverse Diameter（mm）	Volume（ml）	Weight（g）	Grape Varieties	Samples	Longitudinal Diameter（mm）	Transverse Diameter（mm）	Volume（ml）	Weight（g）	Grape Varieties	Samples	Longitudinal Diameter（mm）	Transverse Diameter（mm）	Volume（ml）	Weight（g）	Grape Varieties	Samples	Longitudinal Diameter（mm）	Transverse Diameter（mm）	Volume（ml）	Weight（g）	Grape Varieties	Samples	Longitudinal Diameter（mm）	Transverse Diameter（mm）	Volume（ml）	Weight（g）	Grape Varieties	Samples	Longitudinal Diameter（mm）	Transverse Diameter（mm）	Volume（ml）	Weight（g）	Grape Varieties	Samples	Longitudinal Diameter（mm）	Transverse Diameter（mm）	Volume（ml）	Weight（g）	Grape Varieties	Samples	Longitudinal Diameter（mm）	Transverse Diameter（mm）	Volume（ml）	Weight（g）
Himord Seedless	1	10.86	6.52	0.3	0.2179	Himord Seedless	1	14.82	10.48	0.7	0.8155	Himord Seedless	1	15.52	11.32	1	1.0401	Himord Seedless	1	17.41	12.71	1.6	1.5777	Himord Seedless	1	16.82	14.46	2	2.1805	Himord Seedless	1	19.69	18.04	3.2	4.1568	Himord Seedless	1	19.25	16.49	3	3.0307	Himord Seedless	1	18.07	16.71	3	3.0785
	2	9.52	5.54	0.2	0.1434		2	15.62	10.62	1	0.9556		2	15.72	11.18	1.2	1.0537		2	15.95	13.4	1.8	1.5509		2	14.44	13.21	1.5	1.5325		2	14.57	14.6	2	1.8916		2	17.97	16.48	2.8	2.6873		2	16.79	14.99	2.8	2.4271
	3	7.26	4.82	0.1	0.074		3	16.08	11.04	1	0.9674		3	15.54	10.38	1.2	0.9631		3	16.43	14.77	2	2.0315		3	16.11	13.71	1.5	1.8161		3	16.51	14.39	2	1.9582		3	17.38	14.52	2.8	2.2673		3	18.61	16.33	2.8	2.7936
	4	8.44	7.76	0.2	0.1413		4	13.64	10.44	0.8	0.7991		4	15.62	10.94	1.2	0.9482		4	17.1	12.56	1.6	1.538		4	16.55	14.09	2	1.9058		4	17.93	16.83	3	2.9824		4	17.01	15.49	2.8	2.2061		4	17.97	15.88	2.9	2.7728
	5	7.56	4.62	0.1	0.0694		5	14.92	11.86	1	0.9231		5	16.68	11.56	1.4	1.2947		5	16.11	12.47	1.4	1.5313		5	15.56	13.51	1.5	1.6866		5	18.2	17.19	3.2	3.2811		5	16.49	14.36	2.6	2.1553		5	17.42	15.51	2.8	2.4452
	6	10.18	6.62	0.3	0.2123		6	15.12	10.26	0.8	0.8652		6	15.24	11.38	1	1.0374		6	17.99	13.8	1.8	1.714		6	16.46	14.28	1.6	2.0117		6	14.13	13.41	2	1.5538		6	16.54	15.46	2.8	2.3532		6	18.75	16.13	3	2.7869
	7	10.02	6.48	0.3	0.1852		7	13.52	10.52	0.8	0.7771		7	15.62	12.24	1.2	1.2569		7	16.12	12.51	1.4	1.5206		7	17.06	14.01	1.8	1.9263		7	18.36	19.71	3	3.1308		7	19.2	17.79	3.2	3.1042		7	17.19	15.77	2.6	2.4669
	8	7.24	4.72	0.1	0.0749		8	14.82	10.28	0.6	0.7994		8	13.52	10.36	0.7	0.7576		8	16.44	11.94	1.2	1.2944		8	16.93	14.69	2	2.0945		8	17.24	16.05	2.8	2.7035		8	17.51	14.43	2.8	2.1716		8	16.39	14.41	2.4	2.0507
	9	8.28	4.76	0.1	0.0908		9	14.62	10.68	0.8	0.8162		9	14.72	10.12	0.8	0.8315		9	15.41	10.49	1.4	1.097		9	16.96	14.1	1.5	1.9945		9	17.21	16.16	2.8	2.4937		9	17.77	15.87	2.8	2.4146		9	18.19	16.47	2.8	2.6749
	10	7.48	4.72	0.1	0.0718		10	12.74	9.69	0.6	0.6023		10	15.32	10.86	1	0.9213		10	17.51	12.67	1.6	1.4379		10	16.71	14.08	1.5	1.8603		10	16.87	14.92	2.6	2.0128		10	16.82	14.47	2.4	2.1834		10	15.16	13.53	1.5	1.6468
	11	7.66	5.08	0.1	0.0782		11	13.64	9.42	0.8	0.6556		11	14.42	10.52	0.8	0.8002		11	15.85	12.25	1.6	1.4193		11	16.29	13.933	1.4	1.3795		11	18.1	15.73	2.6	2.5407		11	19.07	15.96	2.6	2.8417		11	17.62	15.61	2.6	2.5203
	12	6.44	4.74	0.1	0.0566		12	13.16	9.72	0.6	0.6405		12	13.42	9.54	0.7	0.6409		12	14.95	11.43	1.2	1.1676		12	14.04	12.79	1.4	1.3797		12	15.84	13.79	2	1.5992		12	17.47	15.64	2.8	2.5698		12	17.31	15.46	2.6	2.5098
	13	9.17	5.82	0.2	0.1476		13	13.99	9.66	0.6	0.7554		13	14.52	10.41	0.8	0.8084		13	15.07	11.58	1.3	1.2053		13	15.12	13.23	1.4	1.3527		13	19.27	16.18	3	2.8054		13	19.76	17.91	3.2	3.9779		13	17.37	15.51	2.6	2.5101
	14	8.77	5.97	0.2	0.1556		14	14.13	10.66	0.7	0.7865		14	14.42	10.72	0.8	0.8342		14	15.22	11.48	1.2	1.1977		14	15.38	13.39	1.5	1.5821		14	19.18	15.44	2.8	2.4676		14	18.35	15.86	2.9	2.7461		14	18.02	15.98	2.8	2.5973
	15	7.51	4.78	0.1	0.0712		15	14.43	10.77	0.8	0.8008		15	13.33	10	0.7	0.6841		15	17.21	12.18	1.6	1.4155		15	14.69	13.97	1.5	1.5963		15	19.34	14.7	2.6	2.5237		15	18.17	15.44	2.8	2.4166		15	18.8	16.19	3	2.8762
	16	7.09	4.63	0.1	0.0681		16	15.8	10.24	0.8	0.9137		16	13.34	9.02	0.6	0.6297		16	15.81	11.92	1.2	1.2802		16	16.01	13.58	1.5	1.7854		16	17.43	15.71	2.6	2.5281		16	18.58	15.64	2.8	2.5555		16	18.9	16.43	3	2.9761
	17	10.21	7.02	0.3	0.2272		17	13.63	9.19	0.6	0.7353		17	14.16	10.13	0.8	0.7697		17	16.77	12.16	1.5	1.3587		17	16.32	14.11	1.8	1.9195		17	18.21	14.93	2.6	2.1064		17	18.17	15.31	2.8	2.3164		17	17.11	15.67	2.6	2.5673
	18	8.45	5.13	0.1	0.1184		18	13.1	9.3	0.6	0.7196		18	13.33	9.53	0.7	0.6038		18	15.79	11.64	1.2	1.2571		18	16.09	13.31	1.5	1.7474		18	17.24	15.23	2.6	2.2819		18	16.89	14.94	2.6	2.1891		18	16.95	15.11	2.6	2.4831
	19	9.61	6.02	0.3	0.1958		19	14.83	10.97	0.7	0.8566		19	15.35	10.9	1.2	0.9257		19	16.48	12.31	1.5	1.4103		19	15.02	13.19	1.4	1.3099		19	18.46	14.3	2.2	1.9995		19	16.55	15.31	2.5	2.1124		19	17.36	15.91	2.8	2.5885
	20	6.39	4.65	0.1	0.0683		20	15.9	10.54	0.8	0.9405		20	14.58	10.45	0.8	0.7817		20	17.42	13	1.8	1.6128		20	15.26	13.28	1.4	1.3842		20	17.71	14.28	2.2	1.9567		20	17.51	15	2.6	2.2075		20	16.21	14.35	2.4	1.9977
	21	7.52	4.77	0.1	0.0767		21	14.67	9.63	0.6	0.7744		21	13.14	9.69	0.7	0.6498		21	15.35	10.54	1.2	1.1642		21	15.4	13.55	1.5	1.7028		21	17.48	13.38	2	1.7443		21	16.91	14.83	2.4	2.0551		21	18.86	16.05	2.9	2.7767
	22	7.88	4.75	0.1	0.0759		22	15.3	10.53	0.7	0.8169		22	13.3	9.42	0.7	0.6582		22	16.61	12.93	1.7	1.5824		22	16.21	14.03	1.7	1.8477		22	17.32	14.2	2.2	1.9851		22	19.62	17.32	3.2	3.6989		22	18.57	16.75	3	3.1864
	23	8.03	4.88	0.1	0.8669		23	14.17	9.32	0.6	0.7591		23	14.76	10.68	0.9	0.8719		23	16.44	12.5	1.6	1.4581		23	16.85	14.01	1.8	1.8397		23	18.13	14.86	2.6	2.0006		23	19.04	16.88	3	3.4717		23	18.19	16.35	2.8	2.6544
	24	9.83	5.71	0.2	0.1771		24	13.67	9.68	0.6	0.7404		24	14.15	10.01	0.8	0.7908		24	15.45	11.34	1.2	1.1655		24	16.55	14.14	1.6	1.9715		24	16.47	13.63	2	1.5287		24	16.78	15	2.6	2.1667		24	18.85	16.74	3	3.2229
	25	7.94	4.72	0.1	0.0685		25	14.51	10.01	0.7	0.7818		25	15.77	10.92	1.2	0.9521		25	15.77	12.04	1.3	1.3162		25	17.2	14.33	1.9	2.1555		25	16.45	14.62	2.6	2.0986		25	17.87	15.75	2.8	2.3862		25	19.15	17.02	3.2	3.3461
	26	8.91	5.16	0.2	0.152		26	13.88	9.74	0.6	0.7452		26	15.2	10.7	1	0.9389		26	16.02	12.15	1.4	1.3359		26	17.07	14	1.8	1.9191		26	16.92	13.84	2	1.8067		26	17.97	15.75	2.8	2.3892		26	17.79	15.84	2.8	2.5063
	27	10.04	6.37	0.3	0.2153		27	14.07	9.98	0.6	0.7602		27	14.91	10.33	0.9	0.8144		27	16.58	12.27	1.6	1.3911		27	15.91	13.33	1.5	1.7021		27	18.02	15.46	2.7	2.5015		27	17.54	15.81	2.8	2.4042		27	19.01	16.91	3	3.1897
	28	10.16	6.73	0.3	0.2093		28	15.1	10.17	0.8	0.7923		28	13.89	9.85	0.7	0.7847		28	17.11	12.4	1.8	1.4304		28	15.84	13.49	1.5	1.7661		28	16.79	14.77	2.4	2.2119		28	18.88	16.31	2.8	2.6719		28	17.72	15.77	2.6	2.4999
	29	7.44	4.61	0.1	0.0644		29	14.66	9.7	0.7	0.7665		29	13.62	10.04	0.7	0.7065		29	17.09	12.41	1.8	1.4388		29	16.99	14.37	1.9	2.0988		29	18.56	14.59	2.6	2.3444		29	17.91	15.27	2.8	2.3882		29	17.25	15.47	2.6	2.3521
	30	8.18	4.84	0.1	0.8002		30	13.72	9.73	0.6	0.6973		30	14.04	10.12	0.8	0.7415		30	16.83	12.22	1.6	1.4255		30	15.93	13.36	1.5	1.5802		30	18.37	14.34	2.4	2.2764		30	17.93	15.75	2.8	2.4077		30	16.66	14.48	2.4	2.2866
Jinzao Wuhe	1	10.52	8.56	0.4	0.4219	Jinzao Wuhe	1	15.08	12.04	0.8	1.1949	Jinzao Wuhe	1	17.16	14.42	1.6	1.9678	Jinzao Wuhe	1	15.51	13.19	2	1.5742	Jinzao Wuhe	1	18.52	16.76	3	3.3035	Jinzao Wuhe	1	20.09	20.03	4	4.8209	Jinzao Wuhe	1	20.28	18.83	5	4.4886	Jinzao Wuhe	1	21.89	21.57	5	5.9926
	2	9.24	7.06	0.3	0.2202		2	15.72	13.24	1.8	1.4711		2	16.92	15.12	1.4	2.0016		2	17.54	15.7	2.5	2.5209		2	20.23	18.94	3.8	4.2557		2	19.64	18.95	3.8	4.3231		2	20.04	20.46	5.2	4.7601		2	20.21	19.79	4.2	4.7137
	3	9.24	7.04	0.3	0.2179		3	14.76	11.68	1.2	1.0561		3	17.12	14.82	1.6	1.9847		3	17.68	15.27	2.4	2.1242		3	17.52	17.26	3.8	3.2739		3	17.5	17.6	3.2	3.6172		3	20.16	18.68	5	4.1809		3	19.61	19.15	4	4.1706
	4	10.04	7.36	0.3	0.2501		4	16.48	13.06	1.9	1.4086		4	16.42	14.54	1.4	1.9194		4	14.76	14.06	1.8	1.7104		4	19.45	17.72	3.6	3.7313		4	19.14	18.08	3	3.6195		4	19.97	18.7	5	4.1297		4	21.21	20.18	5	4.9236
	5	9.48	6.72	0.3	0.2285		5	14.38	13.28	1.2	1.3506		5	17.36	14.64	1.8	1.9477		5	18.58	16.16	2.5	2.6523		5	20.33	18.37	3	3.9382		5	20.64	19.73	4	4.636		5	20.5	19.73	5.4	4.1781		5	21.04	20.55	5.2	5.5542
	6	10.04	7.32	0.4	0.2753		6	15.42	12.26	0.9	1.1718		6	17.42	13.36	1.8	1.6611		6	15.45	14.12	1.6	1.742		6	18.44	17.86	3.2	3.5453		6	20.41	18.88	4	4.6673		6	18.46	18.12	4.6	4.5873		6	22.12	21.82	6	6.5474
	7	9.32	6.68	0.3	0.1824		7	14.82	12.24	1.4	1.094		7	15.88	13.48	1.4	1.6652		7	17.55	15.37	2.5	2.3723		7	17.81	17.17	3	3.1375		7	18.3	18.28	3.8	3.8831		7	20.13	19.78	5.4	4.7594		7	16.26	17.95	4	3.3762
	8	8.42	5.82	0.2	0.1273		8	15.06	11.86	1.2	1.0946		8	15.46	13.82	1.4	1.6178		8	15.54	15.01	1.8	1.9239		8	17.32	16.62	2.8	3.0344		8	16.19	15.59	3	2.6386		8	18.65	17.74	4.4	3.4359		8	21.56	20.86	4.8	5.2873
	9	6.42	5.06	0.1	0.0831		9	15.22	11.72	1.2	1.1312		9	16.72	14.62	1.6	1.8007		9	15.4	13.75	1.6	1.7492		9	18.55	16.82	3.4	3.3036		9	17.99	17.1	3	3.3281		9	20.36	18.8	5	4.0486		9	21.49	20.56	4.8	5.3646
	10	7.46	5.62	0.1	0.1196		10	15.46	12.12	1.4	1.1787		10	17.48	13.64	2	1.88		10	17.87	14.97	2.5	2.3057		10	17.59	17.32	3	3.1944		10	16.72	15.31	3	2.5309		10	21.09	19.45	5.6	4.9417		10	19.66	19.43	4.2	4.6952
	11	7.86	6.38	0.2	0.1409		11	13.24	11.04	0.8	0.7973		11	14.76	12.16	1.2	1.0801		11	14.47	13.96	1.8	1.9277		11	16.88	16.19	3	2.7063		11	15.84	14.51	3	2.2347		11	18.03	17.28	4.2	3.4577		11	18.26	17.83	4	3.6665
	12	6.04	5.14	0.1	0.0672		12	13.34	11.38	0.6	0.9459		12	15.44	13.34	1.4	1.4661		12	14.13	13.55	1.6	1.6402		12	16.69	15.83	3.2	2.6969		12	17.59	19.78	3	2.7486		12	18.15	17.04	4	3.1365		12	17.88	17.06	4	3.0484
	13	10.27	8.09	0.3	0.3581		13	13.5	11.12	0.6	0.8836		13	14.93	12.37	1.2	1.2899		13	15.29	14.97	1.8	1.8545		13	17.65	17.07	3	3.1881		13	18.6	18.34	3.8	4.0469		13	19.68	19.04	5	4.2415		13	20.2	19.11	5	4.4676
	14	8.09	5.73	0.2	0.1204		14	15.56	12.65	1.6	1.2954		14	16.39	14.09	1.4	1.6903		14	16.8	14.9	2.2	2.1497		14	17.32	16.81	2.8	2.8781		14	19.76	19.09	4	4.2562		14	18.94	18.08	4.8	3.9171		14	22.47	20.87	5.6	5.8147
	15	7.43	5.22	0.1	0.1033		15	14.24	12.25	1.2	1.1873		15	15.37	12.81	1.2	1.3765		15	17.44	15.29	2.4	2.0643		15	17.29	16.77	3	2.9385		15	18.52	18.09	3.7	3.7531		15	18.92	18.29	4.8	4.0241		15	21.06	18.74	5	4.175
	16	9.34	6.55	0.3	0.1972		16	15.29	11.11	1.2	1.0957		16	16.8	14.44	1.5	1.7767		16	14.9	14.71	1.6	1.8018		16	17.18	17.04	3.2	3.3865		16	18.31	17.55	3.4	3.6051		16	20.34	19.77	5.2	4.6718		16	19.67	18.31	4	4.0133
	17	8.51	5.11	0.2	0.1288		17	14.45	11.46	1	0.8995		17	15.19	13.25	1.3	1.5566		17	16.45	15.23	2	1.9779		17	16.79	16.01	3	2.7228		17	19.79	19.19	4	4.2884		17	19.23	18.54	4.9	4.199		17	20.58	19.5	5	4.2597
	18	8.84	5.97	0.2	0.1404		18	14.19	12.27	1	1.1658		18	16.13	13.81	1.4	1.7023		18	17.16	15.09	2.4	2.2261		18	16.91	16.3	2.8	2.8823		18	19.24	18.11	3.8	3.9147		18	19.33	18.43	4.8	4.1718		18	20.65	19.8	4.6	4.7092
	19	9.99	6.57	0.2	0.2037		19	14.12	11.62	1	0.9553		19	16.23	13.74	1.4	1.6445		19	16.7	14.99	2	19516		19	17.78	17.09	3	3.0819		19	18.85	18.28	3.8	4.1748		19	19.93	18.39	4.9	4.0238		19	21.86	19.42	4.8	4.935
	20	9.28	7.1	0.3	0.2353		20	15.69	12.86	1.2	1.2721		20	15.72	13.6	1.4	1.5842		20	17.26	15.23	2.5	2.2877		20	16.95	16.58	2.8	2.9545		20	20.43	19.84	4	4.7333		20	19.32	19.04	5	4.2037		20	20.51	20.25	5	5.0701
	21	9.2	7.15	0.3	0.2357		21	14.31	11.84	1	0.8381		21	14.98	12.52	1.2	1.1474		21	16.43	15.15	2	1.9016		21	17.15	16.83	3	3.0449		21	17.46	16.69	3.2	3.5535		21	18.29	17.28	4.3	3.4909		21	21.21	20.57	5.2	5.0849
	22	10.12	8.19	0.3	0.422		22	14.65	11.87	1	0.8448		22	16.24	14.58	1.4	1.9394		22	17.38	15.11	2.4	2.2862		22	18.12	17.58	3.4	3.4536		22	20.25	20.01	4	4.7998		22	20	18.99	5	4.1762		22	20.01	18.68	4	4.0748
	23	9.86	6.86	0.3	0.2238		23	13.57	11.01	0.8	0.8174		23	14.91	12.77	1.2	1.3334		23	16.09	14.54	1.9	1.7467		23	17.92	17.17	3	3.0557		23	17.79	17.25	3	3.5062		23	19.54	19.04	5	4.2812		23	20.79	19.52	4.8	4.6676
	24	9.73	6.94	0.3	0.2402		24	15.58	11.57	1.2	1.1672		24	15.06	13.28	1.3	1.5059		24	15.14	14.17	1.8	1.7365		24	19.16	18.05	3.8	3.5965		24	16.8	16.1	3	2.7944		24	18.73	17.86	4.6	3.9156		24	18.62	18.03	4	3.9771
	25	9.74	7.25	0.3	0.2762		25	16.31	12.75	1.7	1.3561		25	17.14	15.01	1.7	1.9664		25	16.99	14.84	2	2.0001		25	18.99	17.67	3.4	3.4162		25	20.27	19.55	4	4.6972		25	18.59	17.37	4.4	3.5786		25	18.69	18.54	4.2	4.3565
	26	8.27	5.23	0.2	0.1079		26	16.37	12.66	1.7	1.3169		26	16.3	13.85	1.4	1.7451		26	16.86	15.13	2.2	2.1059		26	17.58	17.01	3	3.0066		26	19.16	18.17	3.8	4.0562		26	19.14	18.59	5	4.1573		26	19.57	19.22	4.4	4.4728
	27	8.29	5.87	0.2	0.1408		27	15.44	11.95	1.4	1.1773		27	17.15	14.88	1.6	1.9768		27	15.64	14.87	1.8	1.8574		27	19.16	17.97	3.6	3.4781		27	18.44	18.39	3.8	4.0919		27	20.49	20.1	5.1	4.4871		27	18.15	17.77	4	3.6541
	28	9.15	6.13	0.3	0.1659		28	15.45	11.83	1.3	1.1696		28	17.01	14.54	1.6	1.8891		28	16.97	14.51	12	1.9852		28	19.87	19.02	3.8	3.7651		28	17.55	17.03	3	3.3851		28	18.03	17.43	4.2	3.5119		28	20.22	19.84	4.4	4.6695
	29	9.26	6.58	0.3	0.1969		29	15.52	12.22	1.5	1.9923		29	16.46	14.03	1.4	1.7912		29	17.42	15.05	2.4	2.3066		29	19.32	18.08	3.8	3.7343		29	16.98	15.99	3	2.8141		29	19.18	18.77	4.8	3.8766		29	20.81	20.03	5	4.9811
	30	10.19	8.01	0.3	0.3333		30	15.64	12.18	1.5	1.9087		30	16.28	13.51	1.4	1.8224		30	16.58	14.44	2	1.9016		30	18.92	17.56	3.4	3.4961		30	17.37	17.31	3	3.4117		30	19.49	19.16	5	4.3195		30	20.47	19.75	4.6	4.7076
