# Supplementary material for: Integrative genomic and transcriptomic analyses of a bud sport mutant ‘Jinzao Wuhe’ with the phenotype of large berries in grapevines
Source: PeerJ. 2023 Jan 3;11:e14617. doi: 10.7717/peerj.14617 (PMC9817954; doi:10.7717/peerj.14617)
Supplement: Supplemental Information 5 [file peerj-11-14617-s005.xlsx]

## Sheet: Sheet1
Table S3: Annotation and statistics of InDels.
InDel	Thompson Seedless	Dawuhebai	Himord Seedless	Jinzao Wuhe
DOWNSTREAN	900,016 (27.82%)	978,360 (28.00%)	1,523,290 (28.68%)	1,512,551 (28.62%)
EXON	32,943 (1.02%)	34,863 (1.00%)	46,939 (0.88%)	46,839 (0.89%)
GENE	165 (0.01%)	224 (0.01%)	385 (0.01%)	398 (0.01%)
INTERGENIC	493,982 (15.27%)	535,220 (15.32%)	783,120 (14.74%)	778,812 (14.74%)
INTRON	373,682 (11.55%)	396,908 (11.36%)	586,320 (11.04%)	586,388 (11.10%)
SPLICE_SITE_ACCEPTOR	364 (0.01%)	365 (0.01%)	557 (0.01%)	539 (0.01%)
SPLICE_SITE_DONOR	376 (0.01%)	385 (0.01%)	642 (0.01%)	604 (0.01%)
SPLICE_SITE_REGION	4,201 (0.13%)	4,341 (0.12%)	6,580 (0.12%)	6,531 (0.12%)
TRANSCRIPT	437,876 (13.53%)	464,678 (13.29%)	686,096 (12.92%)	685,675 (12.98%)
UPSTREAM	948,006 (29.30%)	1,033,053 (29.56%)	1,607,311 (30.26%)	1,595,858 (30.20%)
UTR_3_PRIME	28,042 (0.87%)	29,285 (0.84%)	43,466 (0.82%)	43,192 (0.82%)
UTR_5_PRIME	15,671 (0.48%)	17,082 (0.49%)	26,629 (0.50%)	26,644 (0.50%)
DEL	382040	411191	596483	594456
INS	316341	341594	516558	513699
HET	475013	530711	882896	877527
HOM	223368	222074	230145	230628
HET_rate	0.6802	0.705	0.7932	0.7919
Total	698381	752785	1113041	1108155
