# Supplementary material for: Integrative genomic and transcriptomic analyses of a bud sport mutant ‘Jinzao Wuhe’ with the phenotype of large berries in grapevines
Source: PeerJ. 2023 Jan 3;11:e14617. doi: 10.7717/peerj.14617 (PMC9817954; doi:10.7717/peerj.14617)
Supplement: Supplemental Information 6 [file peerj-11-14617-s006.xlsx]

## Sheet: Sheet1
Table S5: Annotation and statistics of SVs.
SV	Thompson Seedless	Dawuhebai	Himord Seedless	Jinzao Wuhe
CHROMOSOME	545 (0.03%)	685 (0.03%)	1,008 (0.03%)	936 (0.03%)
DOWNSTREAN	33,398 (2.08%)	40,510 (1.94%)	58,582 (1.96%)	55,132 (2.05%)
EXON	18,703 (1.16%)	22,321 (1.07%)	34,698 (1.16%)	32,117 (1.20%)
GENE	425,418 (26.44%)	547,174 (26.18%)	805,316 (26.97%)	749,657 (27.90%)
INTERGENIC	80,791 (5.02%)	129,345 (6.19%)	159,798 (5.35%)	149,711 (5.57%)
INTRON	7,033 (0.44%)	8,122 (0.39%)	11,298 (0.38%)	10,940 (0.41%)
SPLICE_SITE_ACCEPTOR	630 (0.04%)	759 (0.04%)	1,124 (0.04%)	1,107 (0.04%)
SPLICE_SITE_DONOR	587 (0.04%)	700 (0.03%)	1,132 (0.04%)	1,074 (0.04%)
SPLICE_SITE_REGION	608 (0.04%)	714 (0.03%)	1,088 (0.04%)	1,081 (0.04%)
TRANSCRIPT	1,006,385 (62.54%)	1,296,666 (62.05%)	1,850,833 (61.99%)	1,627,695 (60.58%)
UPSTREAM	34,242 (2.13%)	41,758 (2.00%)	59,504 (1.99%)	55,891 (2.08%)
UTR_3_PRIME	377 (0.02%)	422 (0.02%)	705 (0.02%)	646 (0.02%)
UTR_5_PRIME	434 (0.03%)	591 (0.03%)	793 (0.03%)	686 (0.03%)
BND	6,808 (32.77%)	9,342 (36.21%)	12,620 (35.34%)	11,481 (34.47%)
DEL	11,909 (57.32%)	13,895 (53.85%)	19,187 (53.73%)	18,234 (54.75%)
Total	18717	23237	31807	29715
