# Supplementary material for: Integrative genomic and transcriptomic analyses of a bud sport mutant ‘Jinzao Wuhe’ with the phenotype of large berries in grapevines
Source: PeerJ. 2023 Jan 3;11:e14617. doi: 10.7717/peerj.14617 (PMC9817954; doi:10.7717/peerj.14617)
Supplement: Supplemental Information 7 [file peerj-11-14617-s007.xlsx]

## Sheet: Sheet1
Table S6 Genes carrying differential SNPs, InDels and SVs
SNP							InDel							Table S6 Genes carrying differential SVs
Chr	Location	Ref	Var	Gene_id	Protein_id		Chr	Location	Ref	Var	Gene_id	Protein_id		Chr	Location	Ref	Var	Gene_id	Protein_id
Chr1	355823	G	A	LOC100267868	XP_019075215.1		Chr1	971033	ATT	A	LOC100259464	XP_002273557.1		Chr1	873193	N	N]CHR1:896732]	LOC109123387	XP_019078491.1
Chr1	355874	C	A	LOC100267868	XP_019075215.1		Chr1	3597691	AGT	A	LOC100266298	XP_019074461.1		Chr10	6603715	N	]CHR9:22390108]N	LOC100261680	XP_002278367.1
Chr1	356270	C	T	LOC100267868	XP_019075215.1		Chr1	3687240	TGG	T	LOC109123579	XP_019079397.1		Chr10	6604157	N	<DEL>	LOC100261680	XP_002278367.1
Chr1	357131	G	T	LOC100267868	XP_019075277.1		Chr1	3687257	C	CTAGCT	LOC109123579	XP_019079397.1		Chr11	7897922	N	N]CHR11:7903089]	LOC100250183	XP_019078654.1
Chr1	386475	G	T	LOC104879402	XP_010650408.1		Chr1	5643470	C	CGT	LOC104879319	XP_010650197.1		Chr11	7897923	N	<DEL>	LOC100250183	XP_019078654.1
Chr1	873363	A	C	LOC109123387	XP_019078491.1		Chr1	10679217	GATGGGTCCGTTCCA	G	LOC104880062	XP_010653586.1		Chr11	13987956	N	N]CHR11:13988237]	LOC100263801	XP_010656700.1
Chr1	902929	A	G	LOC100256051	XP_002275317.3		Chr1	11237430	AG	A	LOC100253317	XP_002277256.1		Chr13	959971	N	N[CHR1:22397122[	LOC100263932	XP_010658233.1
Chr1	1431979	C	T	LOC100264488	XP_002276461.1		Chr1	20804486	TGACA	T	LOC100245452	XP_010655805.1		Chr13	1000184	N	]CHR1:22770704]N	LOC100244922	XP_002276986.1
Chr1	1560899	A	G	LOC100243937	XP_019080404.1		Chr1	20804493	T	TAATA	LOC100245452	XP_010655805.1		Chr13	2615113	N	<DEL>	LOC100263302	XP_019079756.1
Chr1	1844751	T	C	LOC100245596	XP_010648419.1		Chr2	7626057	AT	A	LOC104882505	XP_010664448.1		Chr13	20553703	N	N[CHR7:12401933[	LOC100263478	XP_010659172.2
Chr1	1844964	T	G	LOC100245596	XP_010648419.1		Chr2	8579164	A	AC	LOC100266131	XP_010663114.1		Chr14	1026717	N	N[CHR6:5064978[	LOC100233104	NP_001268072.1
Chr1	2409015	A	G	LOC104878916	XP_010648150.1		Chr2	10851235	A	AC	LOC100242099	XP_002272457.1		Chr14	2507122	N	<DEL>	LOC109123835	XP_019080348.1
Chr1	2542990	C	T	LOC100254250	XP_010648027.1		Chr2	10851236	T	TAA	LOC100242099	XP_002272457.1		Chr14	6672400	N	]CHR6:18175483]N	LOC100265943	XP_010659899.1
Chr1	2542998	G	A	LOC100254250	XP_010648027.1		Chr2	11774038	CT	C	LOC104882198	XP_019080489.1		Chr14	21231557	N	N[CHR8:22179310[	LOC100253195	XP_003633728.1
Chr1	3551879	G	A	LOC100247375	XP_002279634.3		Chr3	1053817	ATTTT	A	LOC109122359	XP_019074468.1		Chr14	24760261	N	N[CHR7:919607[	LOC100241226	XP_002275991.1
Chr1	3607346	C	T	LOC100259351	XP_019074475.1		Chr3	2773016	A	ATT	LOC100245230	XP_002279830.1		Chr14	26762177	N	N[CHR12:20848897[	LOC100255888	XP_002270990.1
Chr1	3607568	C	G	LOC100259351	XP_019074475.1		Chr3	2773018	G	GTCGCA	LOC100245230	XP_002279830.1		Chr14	28052620	N	]CHR4:7051227]N	LOC100252575	XP_003633834.1
Chr1	3607582	G	A	LOC100259351	XP_019074475.1		Chr3	3459346	C	CA	LOC100267485	XP_002284074.1		Chr15	12545918	N	]CHR14:29786380]N	LOC104881830	XP_010661457.1
Chr1	3629042	A	T	LOC100266298	XP_010644106.1		Chr3	4372560	ACG	A	LOC100241846	XP_002281956.2		Chr15	14586498	N	N]CHR15:14613775]	LOC109124052	XP_019081132.1
Chr1	3629064	G	T	LOC100266298	XP_010644106.1		Chr3	11876434	AC	A	LOC100257661	XP_019073866.1		Chr15	17301446	N	]CHR4:2063439]N	LOC100265555	XP_010661956.1
Chr1	3637355	C	T	LOC100266298	XP_010644031.1		Chr3	12637726	ATC	A	LOC104878893	XP_010648108.2		Chr15	19689840	N	N[CHR4:655864[	LOC100258547	XP_019081179.1
Chr1	3687245	G	A	LOC109123579	XP_019079397.1		Chr3	14601135	G	GA	LOC104878938	XP_010648232.1		Chr16	10957599	N	]CHR1:11886496]N	LOC104882144	XP_010662487.1
Chr1	3687248	G	A	LOC109123579	XP_019079397.1		Chr4	3392580	GT	G	LOC100254233	XP_002284380.1		Chr16	11340337	N	<DEL>	LOC109124221	XP_019081589.1
Chr1	3757909	C	T	LOC100250808	XP_002283405.1		Chr4	6494106	A	AAG	LOC100249142	XP_010648823.1		Chr16	13742301	N	N]CHR16:18337621]	LOC100258260	XP_002267774.2
Chr1	3757932	C	A	LOC100250808	XP_002283405.1		Chr4	6494107	TAC	T	LOC100249142	XP_010648823.1		Chr16	19660523	N	]CHR4:13331910]N	LOC100855089	XP_019081537.1
Chr1	3757933	C	T	LOC100250808	XP_002283405.1		Chr4	14571805	C	CAT	LOC104879108	XP_010648973.1		Chr16	21978133	N	]CHR4:11469493]N	LOC100258861	XP_002278061.1
Chr1	3757960	G	A	LOC100250808	XP_002283405.1		Chr4	14571806	CCT	C	LOC104879108	XP_010648973.1		Chr17	2695292	N	]CHR13:22751638]N	LOC100259544	XP_002280824.1
Chr1	3757963	G	A	LOC100250808	XP_002283405.1		Chr4	14571832	C	CT	LOC104879108	XP_010648973.1		Chr17	3169986	N	<DEL>	LOC100244012	XP_002279248.1
Chr1	3757983	T	C	LOC100250808	XP_002283405.1		Chr4	20898581	AG	A	LOC100250644	XP_002279718.1		Chr17	3176038	N	N[CHR14:18873529[	LOC100244012	XP_002279248.1
Chr1	5000241	G	A	LOC109122499	XP_019074959.1		Chr4	20898587	G	GA	LOC100250644	XP_002279718.1		Chr17	3176039	N	N[CHR14:18873529[	LOC100244012	XP_002279248.1
Chr1	5446711	C	T	LOC100243944	XP_010652088.1		Chr4	21883001	GA	G	LOC100260762	XP_019074866.1		Chr17	3465360	N	]CHR16:18018506]N	LOC100257667	XP_002278114.1
Chr1	5643557	G	A	LOC104879319	XP_010650197.1		Chr4	21925144	TCC	T	LOC100260762	XP_019074866.1		Chr17	4901158	N	N[CHR3:8079648[	LOC100243884	XP_019082095.1
Chr1	5672165	T	G	LOC109123409	XP_019078567.1		Chr5	2416999	GT	G	LOC100259724	XP_002274591.1		Chr17	5602292	N	N[CHR7:3174834[	LOC100253660	XP_002265310.1
Chr1	5890424	G	C	LOC104879144	XP_010649264.1		Chr5	5752044	A	AC	LOC100264870	XP_002279339.1		Chr17	7106630	N	N[CHR5:15283354[	LOC100258790	XP_019082001.1
Chr1	6809705	G	A	LOC100259418	XP_010650869.1		Chr5	5752046	T	TTC	LOC100264870	XP_002279339.1		Chr17	7943783	N	]CHR2:8271696]N	LOC100265641	XP_010663262.1
Chr1	7023114	T	A	LOC100261157	XP_002285456.1		Chr5	5752053	TTATA	T	LOC100264870	XP_002279339.1		Chr18	287861	N	N[CHR8:22261419[	LOC100259801	XP_019072017.1
Chr1	7029339	G	C	LOC100256069	XP_002285460.2		Chr5	5752060	T	TCCCC	LOC100264870	XP_002279339.1		Chr18	2670359	N	N[CHR15:6223597[	LOC100260874	XP_010664193.1
Chr1	7048290	G	C	LOC100245779	XP_002285472.2		Chr5	5752079	C	CTT	LOC100264870	XP_002279339.1		Chr18	3644591	N	]CHR1:22042554]N	LOC100262519	XP_010664264.1
Chr1	7048412	G	A	LOC100245779	XP_002285472.2		Chr5	5752081	TCA	T	LOC100264870	XP_002279339.1		Chr18	3669716	N	]CHR5:14902103]N	LOC100245365	XP_010664266.1
Chr1	7060983	A	G	LOC104879551	XP_010651036.1		Chr5	5752091	TTG	T	LOC100264870	XP_002279339.1		Chr18	4052505	N	]CHR3:15467778]N	LOC100252269	XP_010664300.1
Chr1	7367372	C	T	LOC104879707	XP_010651738.2		Chr5	5752095	GC	G	LOC100264870	XP_002279339.1		Chr18	9465508	N	]CHR12:15804117]N	LOC100267853	XP_002284254.1
Chr1	7602205	A	G	LOC104879663	XP_010651604.1		Chr5	6142958	G	GC	LOC100264868	XP_002279864.1		Chr18	10395642	N	N[CHR15:14481356[	LOC100260826	XP_002281605.1
Chr1	7805740	A	T	LOC104879712	XP_010651778.1		Chr5	6142961	TG	T	LOC100264868	XP_002279864.1		Chr18	10818575	N	]CHR3:8413756]N	LOC100267767	XP_002281331.1
Chr1	7930975	C	T	LOC100852822	XP_010651402.1		Chr5	10802988	A	ATG	LOC100249421	XP_019075405.1		Chr18	11288711	N	N[CHR11:3758783[	LOC100232901	NP_001268162.1
Chr1	8185257	G	T	LOC109123566	XP_019079300.1		Chr5	12683403	ATG	A	LOC104879343	XP_010650255.1		Chr18	12148849	N	N[CHR3:12619659[	LOC100245445	XP_002276474.1
Chr1	9185116	C	T	LOC100253564	XP_002265788.2		Chr5	12683406	G	GTC	LOC104879343	XP_010650255.1		Chr18	25195614	N	<DEL>	LOC100251178	XP_010665394.2
Chr1	9429962	G	A	LOC109122762	XP_019076019.1		Chr5	12683412	CATCT	C	LOC104879343	XP_010650255.1		Chr18	27520081	N	N[CHR14:18459429[	LOC100267042	XP_019072347.1
Chr1	9878740	G	A	LOC104879926	XP_019076119.1		Chr5	12683417	A	AGGCG	LOC104879343	XP_010650255.1		Chr18	27961115	N	<DEL>	LOC100244774	XP_002271789.1
Chr1	9878742	C	A	LOC104879926	XP_019076119.1		Chr5	13258540	C	CT	LOC109122600	XP_019075410.1		Chr19	205057	N	N[CHR18:5665672[	LOC100246880	XP_010644060.1
Chr1	9878750	G	T	LOC104879926	XP_019076119.1		Chr5	15345372	AGTTT	A	LOC100855002	XP_019075256.1		Chr19	205058	N	N[CHR18:5665673[	LOC100246880	XP_010644060.1
Chr1	10046026	G	A	LOC100262086	XP_002268171.1		Chr5	21702284	C	CAT	LOC104879439	XP_010650517.1		Chr19	1441848	N	]CHR10:14533599]N	LOC100264158	XP_002283150.1
Chr1	11071827	G	A	LOC109123576	XP_019079371.1		Chr5	22731130	T	TG	LOC104879475	XP_010650637.1		Chr19	7200511	N	]CHR18:27388633]N	LOC100245205	XP_002277314.1
Chr1	11888038	G	A	LOC109123424	XP_019078704.1		Chr5	24585416	A	AG	LOC100245620	XP_019075575.1		Chr2	17864176	N	<DUP>	LOC100263012	XP_010644575.2
Chr1	13829758	T	C	LOC100264433	XP_002267746.1		Chr5	24585421	C	CTAAAGGAA	LOC100245620	XP_019075575.1		Chr4	4464683	N	<DEL>	LOC100252520	XP_002282428.2
Chr1	14446568	C	T	LOC109123427	XP_019078762.1		Chr6	6483559	T	TGCGC	LOC109122826	XP_019076336.1		Chr5	6786607	N	N]CHR5:6796582]	LOC100246045	XP_010650011.1
Chr1	18414518	G	C	LOC100251075	XP_019078843.1		Chr6	10640050	CCA	C	LOC100242804	XP_010651657.1		Chr5	19610079	N	N]CHR5:19619965]	LOC100258300	XP_002266277.1
Chr1	18633922	T	A	LOC100247600	XP_002269169.1		Chr6	10640056	G	GCA	LOC100242804	XP_010651657.1		Chr6	3843862	N	N[CHR4:19762635[	LOC100233065	XP_002282216.1
Chr1	18639061	C	G	LOC100252708	XP_002269145.1		Chr6	13010737	AG	A	LOC109122746	XP_019075991.1		Chr7	2480394	N	<DEL>	LOC100256270	XP_019076687.1
Chr1	18639100	C	A	LOC100252708	XP_002269145.1		Chr6	13013671	GTA	G	LOC100259922	XP_010651614.1		Chr7	14248245	N	N[CHR1:7096907[	LOC100254928	XP_010652623.1
Chr1	19530992	G	A	LOC100259590	XP_002266601.1		Chr6	13013757	TAA	T	LOC100259922	XP_010651614.1		Chr7	14423063	N	<DEL>	LOC100248291	XP_010652634.1
Chr1	19653417	G	T	LOC100261441	XP_002266185.1		Chr6	13013769	CT	C	LOC100259922	XP_010651614.1		Chr8	4662217	N	]CHR7:4876640]N	LOC100242721	XP_002270570.2
Chr1	19653422	G	A	LOC100261441	XP_002266185.1		Chr6	18758512	ATT	A	LOC100256913	XP_019076010.1		Chr8	12268553	N	]CHR2:5379002]N	LOC100263725	XP_002282650.1
Chr1	20213204	A	G	LOC104880714	XP_019078926.1		Chr6	18758518	T	TGC	LOC100256913	XP_019076010.1		Chr8	12684171	N	N[CHR6:6912192[	LOC100256832	XP_002276746.2
Chr1	20337444	G	A	LOC100855131	XP_003631326.1		Chr7	14333	G	GTTTT	LOC100245920	XP_010651927.1		Chr8	15115129	N	N[CHR1:20814117[	LOC100242668	XP_002272361.1
Chr1	20351639	G	T	LOC100855162	XP_003631327.1		Chr7	14473	T	TG	LOC100245920	XP_010651927.1		Chr8	15693528	N	N[CHR3:7174828[	LOC100242619	XP_002273523.2
Chr1	20566175	T	A	LOC100266020	XP_019077591.1		Chr7	14478	GA	G	LOC100245920	XP_010651927.1		Chr8	16165661	N	<DEL>	LOC100249491	XP_010654171.1
Chr1	20603667	T	C	LOC100241971	XP_019078949.1		Chr7	1642426	CT	C	LOC100254459	XP_010652126.1		Chr8	17561584	A	<DEL>	LOC100233035	NP_001267971.1
Chr1	20767880	T	A	LOC109123498	XP_019078962.1		Chr7	14734347	CT	C	LOC104879903	XP_010652671.1		Chr8	19524658	C	<DEL>	LOC104880180	XP_010654328.1
Chr1	21314465	T	C	LOC109123217	XP_019077813.1		Chr7	16057508	C	CCCGG	LOC100247722	XP_002265855.1		Chr8	21785773	N	N[CHR1:13614145[	LOC100258928	XP_002278051.2
Chr1	21315652	G	A	LOC109123217	XP_019077813.1		Chr7	16057623	AT	A	LOC100247722	XP_002265855.1		Chr8	22261598	N	<DEL>	LOC100252000	XP_002284404.1
Chr1	21316079	G	A	LOC109123217	XP_019077813.1		Chr7	17517353	C	CA	LOC100252456	XP_002276397.3		Chr9	2778489	N	]CHR7:7369375]N	LOC100251452	XP_010654591.1
Chr2	251762	C	T	LOC100263989	XP_002279684.1		Chr7	17517356	C	CAG	LOC100252456	XP_002276397.3		Chr9	17256889	N	N]CHR9:17257884]	LOC104877362	XP_010655175.1
Chr2	1728294	G	A	LOC100244488	XP_019072234.1		Chr7	18649756	CAT	C	LOC100254367	XP_003632537.1		Chr9	17256890	N	<DEL>	LOC104877362	XP_010655175.1
Chr2	1728479	A	C	LOC100244488	XP_019072234.1		Chr8	4061842	AAG	A	LOC100247933	XP_010653229.1		Chr9	19145021	N	<DEL>	LOC100853428	XP_003632910.1
Chr2	1768119	A	C	LOC100267402	XP_010661870.1		Chr8	8634385	CTGGTCCTATTGATTCT	C	LOC100247292	XP_010653415.1
Chr2	3470914	T	C	LOC100254793	XP_002276972.2		Chr8	8634422	C	CGT	LOC100247292	XP_010653415.1
Chr2	3520182	A	G	LOC104881692	XP_010661030.1		Chr8	8702817	AATGG	A	LOC100257540	XP_019077069.1
Chr2	3755156	A	G	LOC100244461	XP_010661214.1		Chr8	8702822	T	TA	LOC100257540	XP_019077069.1
Chr2	4965367	G	T	LOC100852623	XP_003631451.1		Chr8	9916890	A	AT	LOC100251663	XP_010653373.1
Chr2	5607452	A	G	LOC100853585	XP_010662700.1		Chr8	12103324	AG	A	LOC109123015	XP_019077145.1
Chr2	6612783	C	T	LOC104882513	XP_019081831.1		Chr8	13164196	CT	C	LOC109122968	XP_019077008.1
Chr2	8469110	C	A	LOC100260925	XP_019080275.1		Chr8	13778148	T	TG	LOC100255011	XP_002277576.1
Chr2	8469111	A	G	LOC100260925	XP_019080275.1		Chr8	13778150	CT	C	LOC100255011	XP_002277576.1
Chr2	8579634	A	G	LOC100266131	XP_010663114.1		Chr8	14215784	C	CTATTA	LOC100243094	XP_019077234.1
Chr2	11781331	C	T	LOC104882198	XP_019080489.1		Chr8	14258732	G	GCC	LOC100265411	XP_002274570.1
Chr2	11873712	A	T	LOC104877356	XP_010664268.1		Chr8	16386145	TTA	T	LOC100854478	XP_003632656.1
Chr2	12280620	A	C	LOC104882542	XP_019081395.1		Chr8	16386149	C	CACAAAATG	LOC100854478	XP_003632656.1
Chr2	13503229	G	C	LOC100246589	XP_019080598.1		Chr8	16506046	C	CA	LOC100251106	XP_002275202.1
Chr2	13687150	C	T	LOC109124294	XP_019081915.1		Chr8	18970864	A	AACTTGTGGAATTGTTTCATTGGAGAATCCACAGGAAG	LOC100267423	XP_019077093.1
Chr2	13687389	G	A	LOC109124294	XP_019081915.1		Chr8	19382701	GTC	G	LOC100853352	XP_010653952.1
Chr2	13687405	C	T	LOC109124294	XP_019081915.1		Chr8	19382719	CCT	C	LOC100853352	XP_010653952.1
Chr2	14040604	C	T	LOC104877459	XP_010644016.1		Chr8	22039022	T	TCA	LOC100265754	XP_010653773.1
Chr2	14040616	C	A	LOC104877459	XP_010644016.1		Chr9	968827	GT	G	LOC104880290	XP_010654880.1
Chr2	14040642	G	A	LOC104877459	XP_010644016.1		Chr9	1691131	TA	T	LOC100266890	XP_010654511.1
Chr2	14041110	C	A	LOC104877459	XP_010644016.1		Chr9	1691136	T	TTATG	LOC100266890	XP_010654511.1
Chr2	16356113	C	T	LOC104877524	XP_010644263.2		Chr9	2736254	A	AAC	LOC100261686	XP_019077913.1
Chr2	16667841	G	A	LOC109124165	XP_019081487.1		Chr9	2736256	T	TGGAC	LOC100261686	XP_019077913.1
Chr2	16668026	G	T	LOC109124165	XP_019081487.1		Chr9	2736262	A	AG	LOC100261686	XP_019077913.1
Chr2	16880965	T	C	LOC100242634	XP_010665449.1		Chr9	2736274	T	TGA	LOC100261686	XP_019077913.1
Chr2	17855334	A	G	LOC109124340	XP_019082050.1		Chr9	3684556	T	TA	LOC100855084	XP_019077490.1
Chr3	721326	T	G	LOC100267621	XP_010647545.1		Chr9	12683804	AT	A	LOC104880341	XP_010654987.2
Chr3	1055512	C	T	LOC100245253	XP_010647281.1		Chr9	12683808	A	AT	LOC104880341	XP_010654987.2
Chr3	1055521	G	A	LOC100245253	XP_010647281.1		Chr10	10224612	AAG	A	LOC100252519	XP_002269462.1
Chr3	1106993	T	C	LOC109121502	XP_019074359.1		Chr10	10436293	G	GAA	LOC100242277	XP_002270585.1
Chr3	1107134	A	G	LOC109121502	XP_019074359.1		Chr10	10436295	TGA	T	LOC100242277	XP_002270585.1
Chr3	1176893	A	C	LOC104877365	XP_010647711.2		Chr10	14106890	TTG	T	LOC100264792	XP_002270542.1
Chr3	1192927	C	T	LOC100852508	XP_010647709.1		Chr10	14106894	A	AC	LOC100264792	XP_002270542.1
Chr3	1234885	C	T	LOC100262288	XP_019074473.1		Chr11	1479855	TGATA	T	LOC100264596	XP_003633095.2
Chr3	1426973	C	T	LOC100262391	XP_010647103.1		Chr11	3607008	CGT	C	LOC100242417	XP_002281437.1
Chr3	1426978	T	C	LOC100262391	XP_010647103.1		Chr11	5562332	T	TAC	LOC100259059	XP_002266646.3
Chr3	1872408	G	A	LOC100248713	XP_003631567.1		Chr11	8289518	TC	T	LOC104880719	XP_010656657.1
Chr3	1872466	C	A	LOC100248713	XP_003631567.1		Chr11	8566935	G	GT	LOC100246835	XP_002274695.1
Chr3	1910435	C	A	LOC100255550	XP_019074365.1		Chr11	8707573	TGA	T	LOC109123377	XP_019078470.1
Chr3	2367453	G	A	LOC104878126	XP_010646207.1		Chr12	4378	G	GT	LOC104880812	XP_019078891.1
Chr3	2749883	A	T	LOC100253733	XP_010645840.1		Chr12	2517008	A	AT	LOC100267662	XP_019079308.1
Chr3	2846634	G	A	LOC100854676	XP_010645791.1		Chr12	2517315	C	CA	LOC100267662	XP_019079308.1
Chr3	2850629	A	T	LOC109122301	XP_019074375.1		Chr12	2517318	CA	C	LOC100267662	XP_019079308.1
Chr3	3459339	C	A	LOC100267485	XP_002284074.1		Chr12	2598588	CTT	C	LOC100254091	XP_010657053.1
Chr3	3848725	C	T	LOC100260681	XP_019074444.1		Chr12	4411230	GT	G	LOC100259120	XP_002274156.4
Chr3	5097326	A	G	LOC100260579	XP_010647831.1		Chr12	4411235	C	CCG	LOC100259120	XP_002274156.4
Chr3	5097331	C	T	LOC100260579	XP_010647831.1		Chr12	4411238	TC	T	LOC100259120	XP_002274156.4
Chr3	5099079	G	A	LOC100260579	XP_010647831.1		Chr12	5123407	T	TG	PMT4	XP_002263849.1
Chr3	5099084	T	G	LOC100260579	XP_010647831.1		Chr12	5123505	GTTTCA	G	PMT4	XP_002263849.1
Chr3	5629699	T	G	LOC104878818	XP_019074386.1		Chr12	5123512	C	CAAAAG	PMT4	XP_002263849.1
Chr3	5629712	T	C	LOC104878818	XP_019074386.1		Chr12	5124057	CTA	C	PMT4	XP_002263849.1
Chr3	5701045	C	T	LOC100853292	XP_019074557.1		Chr12	5124061	A	AGG	PMT4	XP_002263849.1
Chr3	7054740	A	T	LOC100263572	XP_010647928.1		Chr12	5654840	GAC	G	LOC100261975	XP_002270663.2
Chr3	7056024	T	A	LOC100246442	XP_010647929.1		Chr12	8292413	AT	A	LOC104880912	XP_010657399.1
Chr3	7201957	C	T	LOC100265163	XP_002264769.1		Chr12	9198593	G	GAA	LOC100249432	XP_002272021.1
Chr3	7428757	A	G	LOC100244661	XP_002264800.1		Chr12	12176129	G	GC	LOC104880954	XP_010657550.1
Chr3	7748711	G	T	LOC100259955	XP_019074395.1		Chr12	15659705	CT	C	LOC100241228	XP_010657835.1
Chr3	7852946	C	T	LOC100258345	XP_002268333.1		Chr12	15659707	AGGGTT	A	LOC100241228	XP_010657835.1
Chr3	7852987	G	A	LOC100258345	XP_002268333.1		Chr12	17240542	GT	G	LOC100246324	XP_019078998.1
Chr3	7853032	A	G	LOC100258345	XP_002268333.1		Chr12	17880908	AT	A	LOC100254853	XP_010657726.1
Chr3	9150195	T	C	LOC100256689	XP_002273199.1		Chr12	17880911	T	TG	LOC100254853	XP_010657726.1
Chr3	9470116	C	T	LOC109122316	XP_019074400.1		Chr12	19146590	AACCAATG	A	LOC100256081	XP_019079083.1
Chr3	9740500	G	C	LOC100245063	XP_002264871.2		Chr12	19171928	TCTGATTCAACTATTACCTTGGGGATCTCAAGA	T	LOC100261042	XP_010658086.1
Chr3	9740513	C	G	LOC100245063	XP_002264871.2		Chr12	19879030	C	CT	LOC100245802	XP_019078824.1
Chr3	10788146	C	T	LOC109122375	XP_019074609.1		Chr12	21104263	GTGCT	G	LOC104881040	XP_019078822.1
Chr3	11345391	C	A	LOC100247569	XP_002265008.1		Chr12	21192566	TC	T	LOC104881039	XP_010657950.1
Chr3	11345454	C	G	LOC100247569	XP_002265008.1		Chr12	21192576	A	AG	LOC104881039	XP_010657950.1
Chr3	11917064	T	G	LOC100854955	XP_010648089.1		Chr12	21439507	CA	C	LOC104881064	XP_019078794.1
Chr3	13183662	A	T	LOC104878898	XP_010648112.2		Chr12	21439511	A	AG	LOC104881064	XP_019078794.1
Chr3	13899621	C	T	LOC109122323	XP_019074415.1		Chr12	21649888	ATG	A	LOC104881057	XP_010658092.1
Chr3	13900086	C	T	LOC109122323	XP_019074415.1		Chr12	22502421	GT	G	LOC109123451	XP_019078848.1
Chr3	14601728	G	A	LOC104878938	XP_010648232.1		Chr13	268649	GA	G	LOC104881107	XP_010658317.2
Chr3	14601782	C	T	LOC104878938	XP_010648232.1		Chr13	1527325	CTCTGGTTTAAACTTTAA	C	LOC100263812	XP_002274952.2
Chr3	15601498	G	A	LOC104878942	XP_010648236.1		Chr13	4061987	TACGACAGGCG	T	LOC109123622	XP_019079466.1
Chr3	15601501	C	T	LOC104878942	XP_010648236.1		Chr13	6690056	C	CAA	LOC100256418	XP_010658347.1
Chr3	15604113	G	A	LOC104878944	XP_010648238.1		Chr13	6690058	AAG	A	LOC100256418	XP_010658347.1
Chr3	17180204	C	T	LOC100254677	XP_002270573.2		Chr13	18482655	GT	G	LOC100854267	XP_010659051.1
Chr3	17250179	C	T	LOC104878954	XP_010648247.1		Chr13	19382230	TG	T	LOC104881264	XP_010659076.1
Chr3	17250183	G	A	LOC104878954	XP_010648247.1		Chr13	21381396	T	TCATGCATCAAAAA	LOC100854534	XP_019079832.1
Chr3	17442494	G	T	LOC100263307	XP_019074667.1		Chr13	21760686	A	ATG	LOC100248162	XP_019079747.1
Chr3	17476257	T	C	LOC100246147	XP_010648252.1		Chr13	21760687	CAA	C	LOC100248162	XP_019079747.1
Chr3	18805016	A	G	LOC100267294	XP_002265264.1		Chr13	24215617	AG	A	LOC100266629	XP_019079703.1
Chr3	18862236	G	C	LOC100244985	XP_002265067.1		Chr14	6133808	CA	C	LOC100854639	XP_019080448.1
Chr3	18862934	G	A	LOC100244985	XP_002265067.1		Chr14	7207689	GCTCC	G	LOC100248643	XP_002274129.1
Chr3	19128470	C	A	LOC109122329	XP_019074426.1		Chr14	7207695	TC	T	LOC100248643	XP_002274129.1
Chr4	313779	T	C	LOC100266420	XP_019074808.1		Chr14	7207699	G	GTGCGA	LOC100248643	XP_002274129.1
Chr4	314169	A	G	LOC100266420	XP_019074808.1		Chr14	7207725	CGTCT	C	LOC100248643	XP_002274129.1
Chr4	521541	C	T	LOC100243932	XP_010648308.1		Chr14	9464747	TCC	T	LOC100246029	XP_019080606.1
Chr4	521543	C	A	LOC100243932	XP_010648308.1		Chr14	11944553	TGG	T	LOC100264805	XP_010660193.1
Chr4	2462485	C	T	LOC100247441	XP_002280960.2		Chr14	11944556	AGG	A	LOC100264805	XP_010660193.1
Chr4	2537177	T	C	LOC100254299	XP_010648467.1		Chr14	14487334	ACC	A	LOC109123847	XP_019080387.1
Chr4	3392561	T	A	LOC100254233	XP_002284380.1		Chr14	18122976	TG	T	LOC100854795	XP_010660470.1
Chr4	3392636	A	C	LOC100254233	XP_002284380.1		Chr14	23180185	G	GAAAA	LOC100256705	XP_010660565.1
Chr4	3392637	A	C	LOC100254233	XP_002284380.1		Chr14	27243209	C	CT	LOC100852579	XP_019080540.1
Chr4	3392701	C	T	LOC100254233	XP_002284380.1		Chr15	725836	TGATCGGATCG	T	LOC100248844	XP_019081052.1
Chr4	3419553	C	T	LOC109122449	XP_019074819.1		Chr15	5123637	GCC	G	LOC104881757	XP_019081138.1
Chr4	3419583	G	A	LOC109122449	XP_019074819.1		Chr15	5123658	TC	T	LOC104881757	XP_019081138.1
Chr4	4020866	C	T	LOC109122450	XP_019074822.1		Chr15	9438812	GCT	G	LOC100854617	XP_010661473.1
Chr4	4020878	C	T	LOC109122450	XP_019074822.1		Chr15	14297980	T	TGTAC	LOC100264273	XP_003633934.2
Chr4	6494113	A	C	LOC100249142	XP_010648823.1		Chr15	15732629	TTG	T	LOC100266067	XP_010661587.1
Chr4	6831541	T	C	LOC100262865	XP_010648761.1		Chr15	16653081	AG	A	LOC109123988	XP_019080959.1
Chr4	7315807	T	G	LOC100255364	XP_002268758.2		Chr15	17268156	C	CT	LOC100255258	XP_010661962.1
Chr4	7315828	C	A	LOC100255364	XP_002268758.2		Chr15	19560230	AT	A	LOC100258459	XP_002273976.1
Chr4	8488187	A	T	LOC100265839	XP_002270975.3		Chr15	19674517	AAACACGTC	A	LOC100248312	XP_010661763.2
Chr4	8664982	A	G	LOC109122482	XP_019074885.1		Chr15	19674528	GGGCTTCGAAACCAAGACCCCTCTGAGCATACCCGGCAA	G	LOC100248312	XP_010661763.2
Chr4	8725113	G	C	LOC100245134	XP_019075154.1		Chr15	19884378	T	TGG	LOC104881911	XP_010661744.1
Chr4	8725916	C	A	LOC100245134	XP_019075154.1		Chr15	19957558	GGA	G	LOC100256854	XP_019081248.1
Chr4	10078812	G	A	LOC100256473	XP_002265819.1		Chr16	1406481	G	GCC	LOC104881997	XP_010662176.1
Chr4	10078815	G	T	LOC100256473	XP_002265819.1		Chr16	1406486	TGG	T	LOC104881997	XP_010662176.1
Chr4	14571851	C	T	LOC104879108	XP_010648973.1		Chr16	1406493	T	TATCAG	LOC104881997	XP_010662176.1
Chr4	15400147	A	G	LOC100240846	XP_002266962.1		Chr16	1406496	CAAACT	C	LOC104881997	XP_010662176.1
Chr4	15504554	G	A	LOC109122464	XP_019074850.1		Chr16	1406508	TTC	T	LOC104881997	XP_010662176.1
Chr4	15504572	G	A	LOC109122464	XP_019074850.1		Chr16	1489803	GTTAAACA	G	LOC109124144	XP_019081451.1
Chr4	15504588	T	C	LOC109122464	XP_019074850.1		Chr16	1489812	TTTCTTGATGCCCAAACG	T	LOC109124144	XP_019081451.1
Chr4	15505035	A	G	LOC109122464	XP_019074850.1		Chr16	1489853	CAT	C	LOC109124144	XP_019081451.1
Chr4	16659541	A	G	LOC100253049	XP_019074745.1		Chr16	7016166	T	TGTGGAGACGAAAGA	LOC100251162	XP_003634026.2
Chr4	16661327	A	G	LOC100253049	XP_019074745.1		Chr16	8619000	TG	T	LOC100854021	XP_010662265.1
Chr4	18075335	G	A	LOC100261569	XP_002270711.1		Chr16	11014106	AT	A	LOC109124126	XP_019081406.1
Chr4	18139270	T	C	LOC100263333	XP_002267239.2		Chr16	11016430	C	CT	LOC100248523	XP_019081407.1
Chr4	18210784	C	T	LOC104879157	XP_010649293.1		Chr16	18224862	TTA	T	LOC100242184	XP_010662676.1
Chr4	18210853	C	T	LOC104879157	XP_010649293.1		Chr16	18234735	AAGTT	A	LOC104882188	XP_019081571.1
Chr4	19956067	G	A	LOC104879128	XP_010649038.1		Chr16	18234744	G	GATTTT	LOC104882188	XP_019081571.1
Chr4	19958540	G	A	LOC104879127	XP_010649035.2		Chr16	18234752	C	CATAG	LOC104882188	XP_019081571.1
Chr4	20407911	C	T	LOC100259998	XP_002264366.2		Chr16	18234753	C	CG	LOC104882188	XP_019081571.1
Chr4	20898583	C	T	LOC100250644	XP_002279718.1		Chr16	18234765	TGG	T	LOC104882188	XP_019081571.1
Chr4	21198738	T	C	LOC100250500	XP_002277147.1		Chr16	18234769	C	CT	LOC104882188	XP_019081571.1
Chr4	21247897	G	A	LOC100259237	XP_019075183.1		Chr16	18234876	GA	G	LOC104882188	XP_019081571.1
Chr4	21408849	T	C	LOC109122504	XP_019075004.1		Chr16	20283775	TTG	T	LOC100264416	XP_019081644.1
Chr4	21525228	C	G	LOC104879197	XP_010649467.1		Chr16	20283778	G	GAA	LOC100264416	XP_019081644.1
Chr4	21925120	A	G	LOC100260762	XP_019074866.1		Chr16	20283783	TAGAC	T	LOC100264416	XP_019081644.1
Chr4	21940402	C	A	LOC100265971	XP_019075130.1		Chr16	20887202	AGG	A	LOC100257345	XP_010662963.1
Chr4	21940412	A	T	LOC100265971	XP_019075130.1		Chr17	2369802	A	ATT	LOC100853858	XP_003634202.1
Chr4	21940417	T	A	LOC100265971	XP_019075130.1		Chr17	3242402	GCAAGTGAGACCGAAGTC	G	LOC104882351	XP_019082117.1
Chr4	21940423	T	C	LOC100265971	XP_019075130.1		Chr17	6967699	ACT	A	LOC100246665	XP_002284835.1
Chr5	136368	A	G	LOC104879219	XP_010649591.1		Chr17	7939951	C	CA	LOC100265641	XP_010663262.1
Chr5	1571817	C	T	LOC100246529	XP_002270853.2		Chr18	394555	CGT	C	LOC100261642	XP_002276703.1
Chr5	1572473	A	G	LOC100246529	XP_002270853.2		Chr18	963061	G	GT	LOC100263329	XP_002272226.1
Chr5	2074495	T	C	LOC104879268	XP_019075376.1		Chr18	1605033	ACTTATTC	A	LOC100264310	XP_002285900.1
Chr5	2541253	G	A	METK2	XP_002266358.1		Chr18	1605042	C	CTG	LOC100264310	XP_002285900.1
Chr5	3111779	G	A	LOC104879232	XP_010649733.1		Chr18	1606044	TA	T	LOC100264310	XP_002285900.1
Chr5	3502820	T	C	LOC100244281	XP_002275787.1		Chr18	1606054	A	AG	LOC100264310	XP_002285900.1
Chr5	3502827	A	C	LOC100244281	XP_002275787.1		Chr18	2339020	C	CTT	LOC100266161	XP_002284607.2
Chr5	3502835	G	C	LOC100244281	XP_002275787.1		Chr18	2339023	AAG	A	LOC100266161	XP_002284607.2
Chr5	4316624	C	G	LOC100249482	XP_002277591.1		Chr18	3673725	C	CA	LOC100245365	XP_019072103.1
Chr5	4684541	C	T	LOC100242550	XP_002281192.1		Chr18	3691041	CA	C	LOC100245365	XP_019072103.1
Chr5	5501157	A	G	LOC104879257	XP_010649938.1		Chr18	4308120	T	TCA	LOC100255818	XP_002285800.1
Chr5	5752051	C	G	LOC100264870	XP_002279339.1		Chr18	4308122	CTT	C	LOC100255818	XP_002285800.1
Chr5	6026619	A	G	LOC100259585	XP_002279629.1		Chr18	4742894	G	GGC	LOC100257548	NP_001267852.1
Chr5	6026625	C	T	LOC100259585	XP_002279629.1		Chr18	5344291	C	CGG	LOC100248818	XP_002285709.1
Chr5	6027193	A	G	LOC100259585	XP_002279629.1		Chr18	5344295	TCC	T	LOC100248818	XP_002285709.1
Chr5	6028935	C	T	LOC100259585	XP_002279629.1		Chr18	5344298	GGCGGTGGCGGTGGT	G	LOC100248818	XP_002285709.1
Chr5	6142862	A	C	LOC100264868	XP_002279864.1		Chr18	5344315	T	TC	LOC100248818	XP_002285709.1
Chr5	6155492	G	T	LOC100254571	XP_002279888.1		Chr18	5344318	CGG	C	LOC100248818	XP_002285709.1
Chr5	6695479	C	G	LOC100240916	XP_002284322.1		Chr18	5605523	AG	A	LOC100245527	XP_002285693.1
Chr5	7339712	G	A	LOC109122674	XP_019075692.1		Chr18	6227853	TA	T	LOC100250527	XP_002283715.3
Chr5	7625080	T	A	LOC109122625	XP_019075447.1		Chr18	6227856	C	CA	LOC100250527	XP_002283715.3
Chr5	7848735	T	C	LOC100266522	XP_010650078.2		Chr18	6903863	GAATTCTCAGCT	G	LOC109121713	XP_019072402.1
Chr5	7852604	A	T	LOC100249526	XP_002285082.2		Chr18	7088638	ACC	A	LOC100260890	XP_002283504.2
Chr5	10236296	G	A	LOC100259730	XP_002285579.2		Chr18	7088643	TGCCA	T	LOC100260890	XP_002283504.2
Chr5	10576670	G	A	LOC100852779	XP_010650208.1		Chr18	7088672	CTT	C	LOC100260890	XP_002283504.2
Chr5	10803050	C	T	LOC100249421	XP_019075405.1		Chr18	7088676	A	ATG	LOC100260890	XP_002283504.2
Chr5	10803163	T	C	LOC100249421	XP_019075405.1		Chr18	9437574	A	AGG	LOC100266128	XP_019072349.1
Chr5	11809233	A	G	LOC104879339	XP_010650252.1		Chr18	11234273	TAGGC	T	LOC104882612	XP_010664948.1
Chr5	11871178	G	C	LOC109122598	XP_019075408.1		Chr18	11234278	T	TA	LOC104882612	XP_010664948.1
Chr5	12095605	A	G	LOC100854167	XP_003632035.1		Chr18	11234375	GT	G	LOC104882612	XP_010664948.1
Chr5	12096718	G	A	LOC100854167	XP_003632035.1		Chr18	12632720	GC	G	LOC104882618	XP_010664957.1
Chr5	12100817	G	A	LOC100854167	XP_003632035.1		Chr18	12994706	C	CCAAA	LOC100245451	XP_002268860.1
Chr5	13261125	G	T	LOC109122600	XP_019075410.1		Chr18	12994715	T	TG	LOC100245451	XP_002268860.1
Chr5	13261246	G	A	LOC109122600	XP_019075410.1		Chr18	12994721	CAG	C	LOC100245451	XP_002268860.1
Chr5	13261251	G	A	LOC109122600	XP_019075410.1		Chr18	12994724	CAGTTTTG	C	LOC100245451	XP_002268860.1
Chr5	14080028	C	T	LOC100264062	XP_010650386.1		Chr18	15066983	AG	A	LOC109121607	XP_019071882.1
Chr5	14081502	C	T	LOC100264062	XP_010650386.1		Chr18	18351043	GC	G	LOC100259656	XP_010665057.1
Chr5	14083001	G	A	LOC100264062	XP_010650386.1		Chr18	21253583	C	CCAAA	LOC100256631	XP_002269211.1
Chr5	14920349	G	C	LOC100250260	XP_003632038.1		Chr18	22124646	C	CATTT	LOC100252625	XP_019071898.1
Chr5	16266823	T	C	LOC104879366	XP_019075513.1		Chr18	22124656	CAACT	C	LOC100252625	XP_019071898.1
Chr5	16362518	C	A	LOC100255539	XP_019075315.1		Chr18	22273509	A	AT	LOC100256018	XP_002265415.1
Chr5	16479351	C	G	LOC104877443	XP_019075292.1		Chr18	23109906	ACACCC	A	LOC100251142	XP_019071994.1
Chr5	16479376	T	A	LOC104877443	XP_019075292.1		Chr18	23805242	TC	T	LOC100249312	XP_010665286.1
Chr5	16869206	A	G	LOC100253844	XP_010650297.1		Chr18	24253077	A	ATC	LOC100264863	XP_019071906.1
Chr5	17558296	C	T	LOC109121511	XP_019075300.1		Chr18	24513928	TCG	T	LOC100855387	XP_019072370.1
Chr5	18100729	G	A	LOC104879405	XP_019075421.1		Chr18	24592619	AT	A	LOC100855211	XP_010665418.1
Chr5	18541625	C	T	LOC104879409	XP_010650446.1		Chr18	25996853	GA	G	LOC109121637	XP_019071918.1
Chr5	19000473	G	C	LOC100242998	XP_002263532.1		Chr18	26577935	ACACT	A	LOC100255078	XP_010665343.1
Chr5	19911863	T	C	LOC100259995	XP_002268048.1		Chr18	26577944	TC	T	LOC100255078	XP_010665343.1
Chr5	21017563	C	T	LOC100244691	XP_010650481.1		Chr18	27341112	C	CAA	LOC104882737	XP_010665310.1
Chr5	21499285	C	A	LOC104879438	XP_010650514.1		Chr18	27341131	GA	G	LOC104882737	XP_010665310.1
Chr5	21574101	C	T	LOC104879443	XP_010650522.1		Chr18	27341133	CAA	C	LOC104882737	XP_010665310.1
Chr5	21702261	A	G	LOC104879439	XP_010650517.1		Chr18	27341144	A	AG	LOC104882737	XP_010665310.1
Chr5	21864831	G	A	LOC104879472	XP_010650632.1		Chr18	27984182	TCGGTTTG	T	LOC100263666	XP_002269754.2
Chr5	21864858	G	A	LOC104879472	XP_010650632.1		Chr19	1703243	TC	T	LOC100262268	XP_010644140.1
Chr5	21864859	A	T	LOC104879472	XP_010650632.1		Chr19	4967011	CG	C	LOC100232919	XP_002283286.1
Chr5	21864877	G	A	LOC104879472	XP_010650632.1		Chr19	4967018	T	TG	LOC100232919	XP_002283286.1
Chr5	21882289	G	C	LOC104879451	XP_010650531.1		Chr19	10157068	C	CATAT	LOC104877638	XP_010644670.1
Chr5	22572638	C	T	LOC109122646	XP_019075499.1		Chr19	13706139	CTT	C	LOC104877696	XP_010644776.2
Chr5	22730719	T	C	LOC104879475	XP_010650637.1		Chr19	15366800	TC	T	LOC104877707	XP_019072593.1
Chr5	22731108	A	G	LOC104879475	XP_010650637.1		Chr19	15366803	TTTACC	T	LOC104877707	XP_019072593.1
Chr5	22775473	T	C	LOC104879459	XP_019075669.1		Chr19	17935264	AG	A	LOC104877743	XP_010644840.1
Chr5	22775918	A	T	LOC104879459	XP_019075669.1		Chr19	22476971	ACCACT	A	LOC100251296	XP_010645146.1
Chr5	22857820	A	G	LOC104879481	XP_010650641.2
Chr5	22860761	G	T	LOC100242192	XP_019075335.1
Chr5	22860798	C	T	LOC100242192	XP_019075335.1
Chr5	22918622	G	A	LOC104879464	XP_010650607.1
Chr5	22918643	A	C	LOC104879464	XP_010650607.1
Chr5	22918655	G	A	LOC104879464	XP_010650607.1
Chr5	23035666	C	G	LOC100852897	XP_010650609.1
Chr5	23047136	A	G	LOC104879486	XP_010650651.2
Chr5	23141355	A	G	LOC100259295	XP_010650656.1
Chr5	23172266	T	A	LOC104879468	XP_010650611.2
Chr5	23177475	T	G	LOC100852910	XP_010650661.1
Chr5	23194664	T	A	LOC104879469	XP_010650613.1
Chr5	24056825	A	T	LOC100252677	XP_002274652.1
Chr5	24056828	C	T	LOC100252677	XP_002274652.1
Chr5	24614767	G	A	LOC104879509	XP_010650778.1
Chr6	411364	G	A	LOC100854198	XP_010651392.1
Chr6	462210	A	G	LOC104879638	XP_019075960.1
Chr6	602199	T	C	LOC100263945	XP_010651384.1
Chr6	602220	G	A	LOC100263945	XP_010651384.1
Chr6	1813322	C	T	LOC109122730	XP_019075963.1
Chr6	1994108	C	A	LOC104879631	XP_010651467.2
Chr6	3843123	C	T	LOC100233065	XP_002282216.1
Chr6	3843131	G	T	LOC100233065	XP_002282216.1
Chr6	5739141	T	G	LOC100258611	XP_002283598.1
Chr6	5739225	C	T	LOC100258611	XP_002283598.1
Chr6	6090354	A	G	LOC100852670	XP_003632146.1
Chr6	6483380	G	C	LOC109122826	XP_019076336.1
Chr6	6483566	T	C	LOC109122826	XP_019076336.1
Chr6	6483578	C	A	LOC109122826	XP_019076336.1
Chr6	6698012	G	A	LOC104879535	XP_010650947.1
Chr6	6698038	G	A	LOC104879535	XP_010650947.1
Chr6	8324228	A	G	LOC109122794	XP_019076104.1
Chr6	8503889	G	A	LOC100241658	XP_010650837.1
Chr6	10049812	G	A	LOC109122742	XP_019075986.1
Chr6	10699852	A	T	LOC109122719	XP_019075929.1
Chr6	10699857	G	T	LOC109122719	XP_019075929.1
Chr6	11283341	A	G	LOC100241079	XP_010651704.1
Chr6	12984994	G	C	LOC100249534	XP_019076182.1
Chr6	13010585	G	A	LOC109122746	XP_019075991.1
Chr6	13010600	A	G	LOC109122746	XP_019075991.1
Chr6	13010861	G	A	LOC109122746	XP_019075991.1
Chr6	13013712	C	G	LOC100259922	XP_010651614.1
Chr6	13013714	T	G	LOC100259922	XP_010651614.1
Chr6	13015193	T	C	LOC100259922	XP_010651614.1
Chr6	15963796	T	C	LOC109122748	XP_019075998.1
Chr6	16119853	G	A	LOC104879676	XP_019076001.1
Chr6	16316685	C	T	LOC100246526	XP_019076029.1
Chr6	17480819	C	T	LOC109122754	XP_019076006.1
Chr6	17480826	C	T	LOC109122754	XP_019076006.1
Chr6	17483699	G	A	LOC109122754	XP_019076006.1
Chr6	18113413	G	A	LOC109122756	XP_019076008.1
Chr6	18758556	G	T	LOC100256913	XP_019076010.1
Chr6	19216907	A	T	LOC100248181	XP_002270637.1
Chr6	19216932	C	T	LOC100248181	XP_002270637.1
Chr6	19328722	G	A	LOC104879702	XP_010651723.1
Chr6	19895629	C	T	LOC100251004	XP_010651909.1
Chr6	20533174	C	T	LOC109122758	XP_019076013.1
Chr6	20816510	A	G	LOC104879729	XP_010651869.1
Chr7	606173	G	A	LOC104879753	XP_010651958.1
Chr7	608942	C	T	LOC109122873	XP_019076497.1
Chr7	1468175	G	A	LOC109122875	XP_019076502.1
Chr7	1475516	A	G	LOC100266556	XP_002276977.1
Chr7	1642402	G	A	LOC100254459	XP_010652126.1
Chr7	1642405	G	A	LOC100254459	XP_010652126.1
Chr7	1642418	G	A	LOC100254459	XP_010652126.1
Chr7	1642431	C	T	LOC100254459	XP_010652126.1
Chr7	1642481	G	A	LOC100254459	XP_010652126.1
Chr7	1642483	G	A	LOC100254459	XP_010652126.1
Chr7	2383280	G	A	LOC100259713	XP_002268490.1
Chr7	2551470	A	G	LOC100249358	XP_010652054.1
Chr7	2551507	C	T	LOC100249358	XP_010652054.1
Chr7	2551526	C	T	LOC100249358	XP_010652054.1
Chr7	2924865	C	T	LOC100253790	XP_002267192.1
Chr7	2924892	G	A	LOC100253790	XP_002267192.1
Chr7	3231271	C	T	LOC100248573	XP_010652193.1
Chr7	3526385	C	T	LOC100248567	XP_010652216.1
Chr7	3600711	C	T	LOC100265777	XP_002274175.1
Chr7	3600720	C	T	LOC100265777	XP_002274175.1
Chr7	3600769	C	A	LOC100265777	XP_002274175.1
Chr7	3827727	G	T	LOC100257310	XP_010652234.1
Chr7	3827746	G	A	LOC100257310	XP_010652234.1
Chr7	4153034	G	A	LOC100255579	XP_002271180.1
Chr7	4213086	C	T	LOC100262417	XP_019076749.1
Chr7	4340505	T	G	LOC104879843	XP_010652541.1
Chr7	4340524	C	T	LOC104879843	XP_010652541.1
Chr7	4340533	C	T	LOC104879843	XP_010652541.1
Chr7	4340535	A	G	LOC104879843	XP_010652541.1
Chr7	4633844	C	A	LOC100258912	XP_010652308.1
Chr7	4979170	A	G	LOC100267452	XP_010652340.1
Chr7	5093099	C	T	LOC104879813	XP_010652352.1
Chr7	5093337	T	C	LOC104879813	XP_010652352.1
Chr7	7096716	T	C	LOC100260006	XP_002270968.1
Chr7	7096914	G	A	LOC100260006	XP_002270968.1
Chr7	7542058	G	A	LOC100258320	XP_010652424.1
Chr7	7914463	T	A	LOC100261770	XP_019076407.1
Chr7	9378728	T	C	LOC104879859	XP_010652564.1
Chr7	9547774	G	A	LOC100251082	XP_002265100.1
Chr7	9547850	C	T	LOC100251082	XP_002265100.1
Chr7	10721915	A	T	LOC100265401	XP_019076573.1
Chr7	11039656	G	A	LOC100251642	XP_002265419.1
Chr7	11137937	T	C	LOC100852949	XP_003632405.1
Chr7	11231730	C	T	LOC109122883	XP_019076536.1
Chr7	11237040	C	G	LOC104879869	XP_010652577.1
Chr7	12047063	T	C	LOC100250032	XP_010652521.1
Chr7	12594415	G	A	LOC104879875	XP_010652582.1
Chr7	14680596	G	T	LOC104879900	XP_019076547.1
Chr7	14734371	C	T	LOC104879903	XP_010652671.1
Chr7	14734383	C	T	LOC104879903	XP_010652671.1
Chr7	14753679	C	T	LOC100246132	XP_002268207.2
Chr7	14758512	C	T	LOC100251274	XP_003632466.2
Chr7	14858827	T	A	LOC100249503	XP_010652683.1
Chr7	16016760	G	A	LOC100249138	XP_002283500.1
Chr7	16016786	G	T	LOC100249138	XP_002283500.1
Chr7	16027170	C	T	LOC100254242	XP_010652758.1
Chr7	16056247	G	C	LOC100247722	XP_002265855.1
Chr7	16057686	G	A	LOC100247722	XP_002265855.1
Chr7	16057726	C	T	LOC100247722	XP_002265855.1
Chr7	16109449	G	A	LOC100264612	XP_002278713.1
Chr7	18028485	G	T	LOC100254360	XP_010652885.1
Chr7	18302795	G	A	LOC100257643	XP_019076423.1
Chr7	18507001	G	T	LOC104879933	XP_019076422.1
Chr7	18631190	C	T	LOC100254367	XP_003632537.1
Chr7	20188479	T	C	LOC100266579	XP_002268418.2
Chr7	20188495	C	G	LOC100266579	XP_002268418.2
Chr7	20324238	C	T	LOC100247650	XP_010653038.1
Chr7	20459759	T	C	LOC100256182	XP_010653046.1
Chr8	4588516	C	T	LOC104879996	XP_019077061.1
Chr8	4588549	C	T	LOC104879996	XP_019077061.1
Chr8	6781927	C	T	LOC100854783	XP_010653315.1
Chr8	7102040	C	G	LOC100854913	XP_019077067.1
Chr8	7102261	G	A	LOC100854913	XP_019077067.1
Chr8	7123912	T	C	LOC100250551	XP_002267438.1
Chr8	7123930	G	C	LOC100250551	XP_002267438.1
Chr8	7123932	A	T	LOC100250551	XP_002267438.1
Chr8	7716771	C	A	LOC100252223	XP_002264265.1
Chr8	7717001	G	T	LOC100252223	XP_002264265.1
Chr8	8592717	T	C	LOC100248811	XP_003632604.1
Chr8	8620341	A	G	LOC100242153	XP_003632603.2
Chr8	8702476	G	C	LOC100257540	XP_019077069.1
Chr8	8702812	C	T	LOC100257540	XP_019077069.1
Chr8	8702834	T	A	LOC100257540	XP_019077069.1
Chr8	8702839	C	T	LOC100257540	XP_019077069.1
Chr8	9505495	G	A	LOC104880026	XP_010653427.1
Chr8	9916893	C	A	LOC100251663	XP_010653373.1
Chr8	11300577	G	A	LOC104880095	XP_010653725.1
Chr8	12095738	G	C	LOC100251693	XP_002277420.3
Chr8	12103211	C	G	LOC109123015	XP_019077145.1
Chr8	12103315	G	C	LOC109123015	XP_019077145.1
Chr8	14141165	C	A	LOC100255110	XP_002274975.1
Chr8	14215698	C	T	LOC100243094	XP_019077234.1
Chr8	14215710	A	G	LOC100243094	XP_019077234.1
Chr8	14215761	T	G	LOC100243094	XP_019077234.1
Chr8	14793709	A	T	LOC100252795	XP_019077324.1
Chr8	15070753	A	G	LOC100254617	XP_010654243.1
Chr8	15324470	C	A	LOC100240889	XP_002272276.2
Chr8	16385946	C	T	LOC100854478	XP_003632656.1
Chr8	16386099	G	A	LOC100854478	XP_003632656.1
Chr8	16386154	T	A	LOC100854478	XP_003632656.1
Chr8	16506064	T	C	LOC100251106	XP_002275202.1
Chr8	16557542	C	T	LOC100252858	XP_010654144.1
Chr8	16557551	C	G	LOC100252858	XP_010654144.1
Chr8	16841855	T	C	LOC100256259	XP_010654126.1
Chr8	17561335	C	T	LOC100233035	NP_001267971.1
Chr8	17624536	C	T	LOC100266594	XP_002283153.2
Chr8	18276536	G	A	LOC100248644	XP_002264311.2
Chr8	18569142	G	A	LOC100243631	XP_019077178.1
Chr8	18970885	A	G	LOC100267423	XP_019077093.1
Chr8	19382711	T	A	LOC100853352	XP_010653952.1
Chr8	19382726	T	A	LOC100853352	XP_010653952.1
Chr8	19525183	C	T	LOC104880180	XP_010654328.1
Chr8	19525192	C	G	LOC104880180	XP_010654328.1
Chr8	19549103	C	A	LOC100852950	XP_010653943.1
Chr8	21139203	G	C	LOC100232979	NP_001267877.1
Chr9	874286	C	A	LOC104880201	XP_010654427.2
Chr9	968843	G	A	LOC104880290	XP_010654880.1
Chr9	1089406	A	G	LOC100263568	XP_019077599.1
Chr9	1575679	G	A	LOC100261822	XP_002277703.1
Chr9	1691137	C	A	LOC100266890	XP_010654511.1
Chr9	2189561	C	G	LOC100244602	XP_019077797.1
Chr9	2598932	C	T	LOC100241278	XP_010654583.1
Chr9	2598946	A	G	LOC100241278	XP_010654583.1
Chr9	2644962	G	T	LOC100253270	XP_019077795.1
Chr9	2650840	C	T	LOC100253270	XP_019077795.1
Chr9	2699319	C	A	LOC104880223	XP_010654590.1
Chr9	2723354	A	C	LOC100266874	XP_002277176.2
Chr9	2725506	C	G	LOC100266874	XP_002277176.2
Chr9	2736199	G	T	LOC100261686	XP_019077913.1
Chr9	2736207	T	C	LOC100261686	XP_019077913.1
Chr9	2736286	G	T	LOC100261686	XP_019077913.1
Chr9	2740173	C	G	LOC100261686	XP_019077913.1
Chr9	2801732	T	A	LOC104880299	XP_019077602.1
Chr9	2885758	C	T	LOC100244634	XP_010654898.1
Chr9	2885772	G	C	LOC100244634	XP_010654898.1
Chr9	2885781	G	C	LOC100244634	XP_010654898.1
Chr9	2885792	C	G	LOC100244634	XP_010654898.1
Chr9	3476659	T	C	LOC104880301	XP_019077757.1
Chr9	3477314	C	T	LOC104880301	XP_019077757.1
Chr9	3477631	G	A	LOC104880301	XP_019077757.1
Chr9	3682547	T	A	LOC100855084	XP_019077490.1
Chr9	3689464	G	T	LOC100260098	XP_010654641.1
Chr9	3689467	G	T	LOC100260098	XP_010654641.1
Chr9	3911830	C	T	LOC104880237	XP_019077790.1
Chr9	4487734	G	C	LOC100241167	XP_019077907.1
Chr9	4515282	T	C	LOC100263444	XP_019077909.1
Chr9	4517323	T	G	LOC104880304	XP_019077910.1
Chr9	4545180	T	C	LOC100248038	XP_010654915.1
Chr9	4671946	T	A	LOC100249841	XP_010654701.2
Chr9	4745477	C	G	LOC100244530	XP_010654918.1
Chr9	5747893	T	A	LOC100261739	XP_010654739.1
Chr9	5848758	G	A	LOC100241131	XP_010654748.1
Chr9	6035195	G	T	LOC104880312	XP_019077618.1
Chr9	6093161	T	C	LOC100241235	XP_003632805.1
Chr9	9465483	A	C	LOC109123144	XP_019077636.1
Chr9	10032976	A	G	LOC104880325	XP_010654960.1
Chr9	10971235	T	G	LOC100245650	XP_002274509.1
Chr9	11314142	G	A	LOC100257552	XP_002269053.1
Chr9	11643167	T	C	LOC100265292	XP_003632886.1
Chr9	12342286	G	A	LOC100247196	XP_002267120.1
Chr9	12764378	G	T	LOC104880352	XP_010655006.1
Chr9	12864981	A	G	LOC104880363	XP_010655072.2
Chr9	12865522	G	T	LOC104880363	XP_010655072.2
Chr9	12865526	T	C	LOC104880363	XP_010655072.2
Chr9	12866902	G	A	LOC104880363	XP_010655072.2
Chr9	13249248	A	G	LOC100256746	XP_010655022.1
Chr9	13646366	G	C	LOC104880366	XP_019077659.1
Chr9	14061077	G	A	LOC100255021	XP_019077520.1
Chr9	16439921	G	A	LOC109123227	XP_019077877.1
Chr9	17134910	C	T	LOC100265551	XP_019077765.1
Chr9	17192973	T	C	LOC100852491	XP_019077764.1
Chr9	17388499	G	A	LOC109123167	XP_019077665.1
Chr9	17388540	T	A	LOC109123167	XP_019077665.1
Chr9	17901701	A	G	LOC100852751	XP_019077481.1
Chr9	18550176	T	A	LOC100253643	XP_019077668.1
Chr9	18550195	G	C	LOC100253643	XP_019077668.1
Chr9	18550792	G	A	LOC100253643	XP_019077668.1
Chr9	20263471	G	T	LOC104880447	XP_019077540.1
Chr9	20551719	T	C	LOC100247976	XP_019077515.1
Chr9	20575385	C	T	LOC100242837	XP_010655336.2
Chr9	20864070	G	A	LOC104880442	XP_010655331.1
Chr9	20879533	G	A	LOC100852827	XP_003632926.1
Chr9	22418817	T	C	LOC100261496	XP_019077677.1
Chr9	22444181	G	T	LOC100251248	XP_002269328.2
Chr9	22445735	C	A	LOC100251248	XP_002269328.2
Chr9	22446638	C	G	LOC100251248	XP_002269328.2
Chr10	705640	C	A	LOC100264114	XP_002263315.1
Chr10	886250	A	G	LOC100854884	XP_003632943.1
Chr10	1018407	A	C	LOC100247051	XP_002268966.1
Chr10	1018435	G	A	LOC100247051	XP_002268966.1
Chr10	1018477	G	A	LOC100247051	XP_002268966.1
Chr10	1018777	G	A	LOC100247051	XP_002268966.1
Chr10	1420966	C	T	LOC100265740	XP_002279791.2
Chr10	1420969	G	T	LOC100265740	XP_002279791.2
Chr10	2527659	C	G	LOC100251554	XP_010655505.1
Chr10	2527725	C	T	LOC100251554	XP_010655505.1
Chr10	2745951	G	A	LOC100253193	XP_010655531.1
Chr10	3088175	C	T	LOC104880542	XP_010655791.1
Chr10	3088181	T	A	LOC104880542	XP_010655791.1
Chr10	3388938	A	G	LOC100266961	XP_010655573.1
Chr10	3446550	T	G	LOC104880495	XP_010655560.1
Chr10	3476897	C	T	LOC104880494	XP_019078077.1
Chr10	3535641	C	G	LOC100241193	XP_010655578.1
Chr10	3535655	A	T	LOC100241193	XP_010655578.1
Chr10	3535665	T	A	LOC100241193	XP_010655578.1
Chr10	3982905	A	T	LOC109123328	XP_019078271.1
Chr10	4090278	C	T	LOC109123299	XP_019078118.1
Chr10	4246216	C	A	LOC100260522	XP_002270514.1
Chr10	4264929	G	A	LOC104880549	XP_010655800.1
Chr10	4264949	T	A	LOC104880549	XP_010655800.1
Chr10	4265015	G	A	LOC104880549	XP_010655800.1
Chr10	5281964	G	A	LOC104880557	XP_010655806.1
Chr10	5281983	T	G	LOC104880557	XP_010655806.1
Chr10	5393867	T	C	LOC104880560	XP_019078067.1
Chr10	5595126	C	T	LOC109123277	XP_019078068.1
Chr10	5735740	G	A	LOC104880564	XP_010655814.1
Chr10	6146743	C	T	LOC100246387	XP_002270051.2
Chr10	6147981	C	T	LOC100246387	XP_002270051.2
Chr10	6412432	C	T	LOC109123280	XP_019078072.1
Chr10	6604935	A	G	LOC100261680	XP_002278367.1
Chr10	6604965	C	T	LOC100261680	XP_002278367.1
Chr10	6861441	A	G	LOC100254898	XP_010655692.1
Chr10	6861465	C	T	LOC100254898	XP_010655692.1
Chr10	8476235	C	T	LOC109123282	XP_019078082.1
Chr10	8477060	C	T	LOC109123282	XP_019078082.1
Chr10	8503565	A	G	LOC104880527	XP_010655739.2
Chr10	8503724	G	A	LOC104880527	XP_010655739.2
Chr10	8703132	C	T	LOC104880568	XP_010655826.2
Chr10	8705131	T	C	LOC104880568	XP_010655826.2
Chr10	8989363	C	A	LOC100247557	XP_002264039.1
Chr10	9371170	G	A	LOC104877439	XP_019078086.1
Chr10	9371409	G	A	LOC104877439	XP_019078086.1
Chr10	9371433	G	A	LOC104877439	XP_019078086.1
Chr10	9510805	C	G	LOC100259375	XP_019078088.1
Chr10	9511092	T	A	LOC100259375	XP_019078088.1
Chr10	9511119	C	T	LOC100259375	XP_019078088.1
Chr10	9658830	T	G	LOC100245738	XP_019078039.1
Chr10	9658843	C	G	LOC100245738	XP_019078039.1
Chr10	9658855	A	T	LOC100245738	XP_019078039.1
Chr10	10224619	A	T	LOC100252519	XP_002269462.1
Chr10	13063594	G	C	LOC100263454	XP_019078294.1
Chr10	13848096	G	A	LOC104880598	XP_010655939.1
Chr10	13848112	C	T	LOC104880598	XP_010655939.1
Chr10	13848204	C	T	LOC104880598	XP_010655939.1
Chr10	15500008	C	T	LOC104880602	XP_010655946.1
Chr10	16224822	C	T	LOC109123270	XP_019078031.1
Chr10	16488342	G	A	LOC100265136	XP_002273824.2
Chr10	16488380	G	T	LOC100265136	XP_002273824.2
Chr10	16488417	G	A	LOC100265136	XP_002273824.2
Chr10	16804445	C	G	LOC109123257	XP_019077973.1
Chr10	16836316	T	G	LOC100249798	XP_010656001.1
Chr10	17388929	T	C	LOC100247588	XP_010656033.1
Chr11	1244372	T	C	LOC104880673	XP_010656486.1
Chr11	1244547	G	A	LOC104880673	XP_010656486.1
Chr11	1244552	C	T	LOC104880673	XP_010656486.1
Chr11	1328633	G	T	LOC109123362	XP_019078447.1
Chr11	2799805	G	A	LOC100266345	XP_010656284.1
Chr11	2799826	C	T	LOC100266345	XP_010656284.1
Chr11	3621920	A	G	LOC100256125	XP_010656364.1
Chr11	4564859	G	T	LOC100266475	XP_010656422.1
Chr11	4564860	G	A	LOC100266475	XP_010656422.1
Chr11	4564875	C	A	LOC100266475	XP_010656422.1
Chr11	4612485	C	T	LOC100855242	XP_003633143.1
Chr11	4612516	G	T	LOC100855242	XP_003633143.1
Chr11	5286697	T	G	LOC100268134	XP_010656471.2
Chr11	5558500	A	C	LOC100259059	XP_019078386.1
Chr11	5587632	T	C	LOC100264230	XP_019078432.1
Chr11	5713938	A	G	LOC100248825	XP_010656507.1
Chr11	5713951	G	A	LOC100248825	XP_010656507.1
Chr11	6575829	G	T	LOC100251651	XP_010656541.1
Chr11	6616773	G	A	LOC109123372	XP_019078462.1
Chr11	6618952	G	A	LOC109123372	XP_019078462.1
Chr11	8032944	G	A	LOC109123373	XP_019078464.1
Chr11	8166912	C	T	LOC109123421	XP_019078688.1
Chr11	8167103	C	T	LOC109123421	XP_019078688.1
Chr11	8167113	C	T	LOC109123421	XP_019078688.1
Chr11	8179472	A	G	LOC109123374	XP_019078465.1
Chr11	8179658	T	C	LOC109123374	XP_019078465.1
Chr11	8481572	G	A	LOC100251863	XP_019078469.1
Chr11	8483000	C	T	LOC100251863	XP_019078469.1
Chr11	8566569	G	T	LOC100246835	XP_002274695.1
Chr11	9016930	G	A	LOC100265559	XP_010656659.1
Chr11	9303211	G	A	LOC104877351	XP_019078471.1
Chr11	15708161	A	G	LOC100248819	XP_002270183.2
Chr11	15815522	G	A	LOC100248929	XP_002267226.1
Chr11	16028413	G	A	LOC104880771	XP_010656782.2
Chr11	16481972	C	G	LOC109123398	XP_019078515.1
Chr11	18248605	C	T	LOC100241048	XP_002268396.1
Chr11	18559446	G	A	LOC100256524	XP_019078740.1
Chr11	18827548	C	T	LOC104880785	XP_010656832.1
Chr11	18827632	C	T	LOC104880785	XP_010656832.1
Chr11	19287300	C	G	LOC100241039	XP_019078585.1
Chr11	19288846	C	T	LOC100241039	XP_019078585.1
Chr11	19316870	C	T	LOC100253036	XP_019078500.1
Chr11	19316913	G	T	LOC100253036	XP_019078500.1
Chr11	19316915	C	A	LOC100253036	XP_019078500.1
Chr11	19316931	G	A	LOC100253036	XP_019078500.1
Chr11	19316950	C	T	LOC100253036	XP_019078500.1
Chr12	714252	G	A	LOC104880857	XP_010657165.1
Chr12	1253681	T	C	LOC100852705	XP_003633262.1
Chr12	2517054	A	C	LOC100267662	XP_019079308.1
Chr12	2518039	T	C	LOC100267662	XP_019079308.1
Chr12	2519516	C	T	LOC100267662	XP_019079308.1
Chr12	2595694	C	A	LOC100254091	XP_010657053.1
Chr12	2595782	T	G	LOC100254091	XP_010657053.1
Chr12	2597278	G	C	LOC100254091	XP_010657053.1
Chr12	3041868	T	C	LOC100252285	XP_002280230.2
Chr12	4411243	T	C	LOC100259120	XP_002274156.4
Chr12	4453669	G	A	LOC100243770	XP_002273678.2
Chr12	4453696	C	G	LOC100243770	XP_002273678.2
Chr12	4453718	G	A	LOC100243770	XP_002273678.2
Chr12	4453948	C	T	LOC100243770	XP_002273678.2
Chr12	4884855	C	A	LOC100252380	XP_010656960.1
Chr12	5059590	A	G	LOC100258492	XP_002266894.2
Chr12	5654816	G	T	LOC100261975	XP_002270663.2
Chr12	5792427	A	G	LOC100261952	XP_010657214.1
Chr12	6161086	C	T	LOC100260125	XP_010657229.1
Chr12	6311713	C	A	ACO2	NP_001267871.1
Chr12	6431645	C	T	LOC100265495	XP_010657244.2
Chr12	7535745	C	G	LOC100243167	NP_001268188.1
Chr12	7569190	C	T	LOC100258586	XP_002281476.1
Chr12	7625206	A	G	GER	NP_001268099.1
Chr12	7689566	A	G	LOC100261928	NP_001267920.1
Chr12	7930947	T	C	LOC109123508	XP_019078985.1
Chr12	7931710	G	T	LOC109123508	XP_019078985.1
Chr12	7931713	C	G	LOC109123508	XP_019078985.1
Chr12	8006624	C	A	LOC100264794	XP_019078990.1
Chr12	8226388	C	T	LOC100247749	XP_010657396.1
Chr12	8553957	C	A	LOC100243318	XP_019078805.1
Chr12	8660587	C	T	LOC104880914	XP_019079134.1
Chr12	8663150	T	A	LOC104880914	XP_019079134.1
Chr12	9082896	T	A	LOC100852993	XP_003633348.1
Chr12	9907162	T	C	LOC100245882	XP_002267947.3
Chr12	12208128	G	A	LOC104880955	XP_010657551.2
Chr12	12208182	G	A	LOC104880955	XP_010657551.2
Chr12	12285092	T	C	LOC100250179	XP_019078836.1
Chr12	12546341	G	A	LOC104880957	XP_019078937.1
Chr12	13839042	T	A	LOC100246885	XP_002267948.1
Chr12	14675584	C	G	LOC109123449	XP_019078832.1
Chr12	14677186	G	A	LOC104880972	XP_010657633.1
Chr12	14732584	C	T	LOC104880974	XP_010657635.1
Chr12	15659722	T	C	LOC100241228	XP_010657835.1
Chr12	15659725	G	A	LOC100241228	XP_010657835.1
Chr12	15659741	A	T	LOC100241228	XP_010657835.1
Chr12	15897075	C	T	LOC104881016	XP_010657873.2
Chr12	16437488	T	G	LOC109123450	XP_019078839.1
Chr12	16751303	C	A	LOC100256601	XP_010657833.1
Chr12	16783417	C	T	LOC100259948	XP_019079339.1
Chr12	16859578	C	G	LOC100254864	XP_010657822.1
Chr12	17240546	T	A	LOC100246324	XP_019078998.1
Chr12	17240557	A	C	LOC100246324	XP_019078998.1
Chr12	17240908	C	A	LOC100246324	XP_019078998.1
Chr12	17249068	G	C	LOC100246324	XP_019078996.1
Chr12	17339853	A	G	LOC100263564	XP_010657785.1
Chr12	17551782	T	C	LOC100249723	XP_010657762.1
Chr12	17722852	A	G	LOC100244662	XP_019079030.1
Chr12	17739143	G	A	LOC100254943	XP_019078951.1
Chr12	17880162	A	G	LOC100254853	XP_010657726.1
Chr12	18903977	G	C	LOC100258269	XP_019079092.1
Chr12	18903983	T	C	LOC100258269	XP_019079092.1
Chr12	18905594	G	A	LOC100258269	XP_019079092.1
Chr12	18979179	G	A	LOC104880997	XP_019078965.1
Chr12	18979189	T	C	LOC104880997	XP_019078965.1
Chr12	19054006	T	G	LOC104880996	XP_010657840.1
Chr12	19220135	G	A	LOC100855076	XP_019079086.1
Chr12	19220150	T	C	LOC100855076	XP_019079086.1
Chr12	19225799	G	C	LOC100855076	XP_019079086.1
Chr12	19225845	T	A	LOC100855076	XP_019079086.1
Chr12	19269230	T	C	LOC104881077	XP_019078969.1
Chr12	20010858	T	C	LOC100252572	XP_002264464.1
Chr12	21016148	A	G	LOC100248921	XP_010657962.1
Chr12	21192607	A	G	LOC104881039	XP_010657950.1
Chr12	21330226	A	C	LOC104881037	XP_019079349.1
Chr12	21330241	A	T	LOC104881037	XP_019079349.1
Chr12	21372719	C	T	LOC104881036	XP_019079394.1
Chr12	21372720	C	G	LOC104881036	XP_019079394.1
Chr12	21372791	C	T	LOC104881036	XP_019079394.1
Chr12	21372856	G	A	LOC104881036	XP_019079394.1
Chr12	21439482	A	T	LOC104881064	XP_019078794.1
Chr12	21788316	A	G	LOC104881031	XP_010657920.1
Chr12	22191797	C	A	LOC100262646	XP_010657907.1
Chr13	268699	A	T	LOC104881107	XP_010658317.2
Chr13	375419	C	T	LOC100265724	XP_002271517.1
Chr13	375442	T	C	LOC100265724	XP_002271517.1
Chr13	375444	C	T	LOC100265724	XP_002271517.1
Chr13	465693	C	G	LOC100246685	XP_010658277.1
Chr13	1533460	G	A	LOC100258660	XP_010658311.1
Chr13	1543492	T	G	LOC100253513	XP_003633447.2
Chr13	2316839	C	T	LOC100263803	XP_002276465.2
Chr13	2457548	C	T	LOC104881145	XP_010658621.1
Chr13	2773583	G	A	LOC100246192	XP_002283701.1
Chr13	2963573	G	C	LOC100259872	XP_002278735.1
Chr13	2963740	T	A	LOC100259872	XP_002278735.1
Chr13	2963760	T	A	LOC100259872	XP_002278735.1
Chr13	3267855	C	T	LOC100246103	XP_002283148.2
Chr13	3267885	T	A	LOC100246103	XP_002283148.2
Chr13	4062012	A	G	LOC109123622	XP_019079466.1
Chr13	4184780	G	C	LOC100251340	XP_002280624.1
Chr13	5867824	G	A	LOC104881152	XP_019079551.1
Chr13	6465041	G	A	LOC109123734	XP_019079917.1
Chr13	6647000	C	G	LOC100256388	XP_019079859.1
Chr13	6647306	C	A	LOC100256388	XP_019079859.1
Chr13	7178742	T	G	LOC100241073	XP_010658643.1
Chr13	9274380	C	T	LOC100241991	XP_010658795.1
Chr13	9574825	T	C	LOC104881205	XP_010658798.1
Chr13	9574834	A	G	LOC104881205	XP_010658798.1
Chr13	9577869	T	C	LOC100255160	XP_019079598.1
Chr13	9835462	G	T	LOC100260154	XP_002264201.2
Chr13	9893666	C	G	LOC100246546	XP_019079599.1
Chr13	11011832	T	C	LOC104881210	XP_010658863.1
Chr13	11011961	C	T	LOC104881210	XP_010658863.1
Chr13	11012006	G	T	LOC104881210	XP_010658863.1
Chr13	11886137	C	T	LOC109123664	XP_019079605.1
Chr13	11927909	C	T	LOC100267168	XP_019079965.1
Chr13	13567737	G	A	LOC100244619	XP_019079611.1
Chr13	16256086	C	T	LOC100260736	XP_010659007.1
Chr13	17084350	C	T	LOC104881252	XP_010659044.1
Chr13	17084401	G	A	LOC104881252	XP_010659044.1
Chr13	17425748	A	C	LOC104881248	XP_010659039.1
Chr13	17791844	G	T	LOC109123674	XP_019079625.1
Chr13	17791955	G	T	LOC109123674	XP_019079625.1
Chr13	17801992	A	T	LOC100267759	XP_019080134.1
Chr13	17805613	C	G	LOC100267759	XP_019080134.1
Chr13	18232578	G	T	LOC100264354	XP_002271166.1
Chr13	18484097	C	G	LOC100854267	XP_010659051.1
Chr13	19162292	G	C	LOC100257485	XP_010659069.1
Chr13	19162301	G	A	LOC100257485	XP_010659069.1
Chr13	19163260	A	G	LOC100257485	XP_010659069.1
Chr13	19165192	A	C	LOC100257485	XP_010659069.1
Chr13	19236762	T	C	LOC109123679	XP_019079631.1
Chr13	19379933	A	T	LOC104881264	XP_010659076.1
Chr13	19927577	T	C	LOC100853979	XP_019079975.1
Chr13	19927589	C	T	LOC100853979	XP_019079975.1
Chr13	19948922	G	A	LOC100251485	XP_010659100.1
Chr13	20222379	C	A	LOC100853980	XP_019079634.1
Chr13	20235333	C	G	LOC104881281	XP_010659184.2
Chr13	20249277	T	G	LOC109123682	XP_019079636.1
Chr13	20308766	A	G	LOC100244656	XP_010659152.2
Chr13	20308782	T	C	LOC100244656	XP_010659152.2
Chr13	20309937	C	G	LOC109123683	XP_019079638.1
Chr13	20334933	A	G	LOC104881283	XP_019079639.1
Chr13	20423894	G	A	LOC109123684	XP_019079642.1
Chr13	20553256	G	A	LOC100263478	XP_010659172.2
Chr13	20554064	C	G	LOC100263478	XP_010659172.2
Chr13	20554226	A	G	LOC100263478	XP_010659172.2
Chr13	21719912	C	T	LOC100246623	XP_010659463.1
Chr13	21778994	G	T	LOC100265334	XP_019079737.1
Chr13	21843343	A	G	LOC100267075	XP_019079710.1
Chr13	21844599	A	C	LOC100267075	XP_019079710.1
Chr13	21922870	C	T	LOC100261888	XP_019079946.1
Chr13	22627883	G	C	LOC100256787	XP_019079704.1
Chr13	22857581	A	G	LOC104881309	XP_019080052.1
Chr13	23029907	C	T	LOC104881329	XP_019079664.1
Chr13	23222742	C	T	LOC100264871	XP_010659324.1
Chr13	23368638	A	G	LOC100257867	XP_002263854.1
Chr13	23401828	C	T	LOC100264773	XP_002266606.1
Chr13	23696672	G	A	LOC109123723	XP_019079803.1
Chr13	23739215	T	C	LOC100244177	XP_019079670.1
Chr13	24110822	C	T	LOC104881347	XP_019079678.1
Chr13	24111958	T	C	LOC104881347	XP_019079678.1
Chr13	24111967	A	G	LOC104881347	XP_019079678.1
Chr13	24149602	T	C	LOC100249452	XP_019079673.1
Chr13	24166415	G	T	LOC100853465	XP_019079688.1
Chr13	24215931	G	A	LOC100266629	XP_019079703.1
Chr13	24246949	T	C	LOC100246038	XP_002268890.2
Chr14	657654	C	T	LOC100244167	XP_002281369.1
Chr14	879628	G	A	LOC100247652	XP_010659704.1
Chr14	1026507	T	C	LOC100233104	NP_001268072.1
Chr14	1347691	C	T	LOC100854181	XP_019080340.1
Chr14	2119902	A	G	LOC104881383	XP_010659794.1
Chr14	2120012	A	C	LOC104881383	XP_010659794.1
Chr14	2120016	G	T	LOC104881383	XP_010659794.1
Chr14	2120023	C	G	LOC104881383	XP_010659794.1
Chr14	2120037	C	G	LOC104881383	XP_010659794.1
Chr14	2120047	A	G	LOC104881383	XP_010659794.1
Chr14	2137034	T	C	LOC104881357	XP_010659624.1
Chr14	2137035	C	A	LOC104881357	XP_010659624.1
Chr14	2328462	C	T	LOC109123834	XP_019080347.1
Chr14	2561209	C	T	LOC104881378	XP_019080349.1
Chr14	3312696	G	T	LOX	NP_001268178.1
Chr14	3320880	A	C	LOC100252850	XP_019080267.1
Chr14	3522054	G	C	LOC100252737	XP_019080464.1
Chr14	3790453	A	C	LOC100243559	XP_010660084.1
Chr14	3917992	C	A	LOC109123838	XP_019080353.1
Chr14	5099948	C	A	LOC104881433	XP_010659984.1
Chr14	5257662	C	G	LOC104881432	XP_019080427.1
Chr14	5257687	T	A	LOC104881432	XP_019080427.1
Chr14	5304614	T	C	LOC100251264	XP_019080441.1
Chr14	5373204	A	C	LOC100251264	XP_019080436.1
Chr14	5387661	C	T	LOC100251264	XP_019080428.1
Chr14	5390660	A	G	LOC100251264	XP_019080428.1
Chr14	5391089	C	T	LOC100251264	XP_019080428.1
Chr14	7295877	G	A	LOC100265852	XP_002279350.1
Chr14	9138451	C	T	LOC100253070	XP_010660147.1
Chr14	9309573	C	G	LOC100246093	XP_019080622.1
Chr14	9309804	T	C	LOC100246093	XP_019080622.1
Chr14	9468587	T	C	LOC100246029	XP_019080606.1
Chr14	9468676	T	C	LOC100246029	XP_019080606.1
Chr14	9468876	G	C	LOC100246029	XP_019080606.1
Chr14	9493248	T	C	LOC109123925	XP_019080608.1
Chr14	9524338	C	A	LOC109123924	XP_019080605.1
Chr14	9525026	T	C	LOC109123924	XP_019080605.1
Chr14	9580666	G	A	LOC104881507	XP_010660241.2
Chr14	9704433	C	T	LOC104881526	XP_010660269.1
Chr14	9716348	T	G	LOC100853456	XP_010660268.1
Chr14	10673976	G	A	LOC100258643	XP_010660262.1
Chr14	11944612	G	T	LOC100264805	XP_010660193.1
Chr14	11944613	G	A	LOC100264805	XP_010660193.1
Chr14	12357952	A	G	LOC100240893	XP_010660192.1
Chr14	14487765	C	T	LOC109123847	XP_019080387.1
Chr14	15571169	G	C	LOC104881584	XP_010660459.1
Chr14	16502169	T	A	LOC104881545	XP_019080744.1
Chr14	16502181	T	C	LOC104881545	XP_019080744.1
Chr14	17513634	A	G	LOC104881548	XP_010660331.1
Chr14	17513710	G	A	LOC104881548	XP_010660331.1
Chr14	19225080	G	T	LOC104881598	XP_010660478.1
Chr14	20426873	C	G	LOC100853550	XP_010660405.1
Chr14	20830327	G	A	LOC109123857	XP_019080400.1
Chr14	21354325	C	T	LOC104881567	XP_010660436.2
Chr14	21354427	G	C	LOC104881567	XP_010660436.2
Chr14	21354445	G	A	LOC104881567	XP_010660436.2
Chr14	22392789	C	G	LOC100261655	XP_002282971.1
Chr14	22392798	T	A	LOC100261655	XP_002282971.1
Chr14	23178753	C	T	LOC100256705	XP_010660565.1
Chr14	23180158	G	A	LOC100256705	XP_010660565.1
Chr14	23596397	A	C	LOC100253138	XP_010660576.2
Chr14	23596461	C	G	LOC100253138	XP_010660576.2
Chr14	23596488	G	T	LOC100253138	XP_010660576.2
Chr14	25809329	C	T	LOC100263506	XP_003633782.1
Chr14	25809574	A	G	LOC100263506	XP_003633782.1
Chr14	25824493	G	T	LOC100246363	XP_019080408.1
Chr14	25874559	G	T	LOC109123865	XP_019080410.1
Chr14	25874735	T	A	LOC109123865	XP_019080410.1
Chr14	25919355	G	C	LOC100855333	XP_019080278.1
Chr14	25941931	A	G	LOC100855406	XP_010660777.1
Chr14	25942248	C	T	LOC100855406	XP_010660777.1
Chr14	26395977	G	A	LOC100264645	XP_010660826.1
Chr14	27220463	C	T	LOC100852430	XP_003633826.2
Chr14	27220739	G	A	LOC100852430	XP_003633826.2
Chr14	27224973	T	G	LOC100852430	XP_019080537.1
Chr14	27225465	T	G	LOC100852430	XP_019080537.1
Chr14	27234302	T	C	LOC100852461	XP_010660875.1
Chr14	27234647	G	A	LOC100852461	XP_010660875.1
Chr14	27243211	A	T	LOC100852579	XP_019080540.1
Chr14	27243265	T	C	LOC100852579	XP_019080540.1
Chr14	28962572	G	A	LOC104881708	XP_010661141.1
Chr14	29079223	C	T	LOC100244032	XP_002277477.1
Chr14	29079224	T	C	LOC100244032	XP_002277477.1
Chr14	29079271	A	T	LOC100244032	XP_002277477.1
Chr14	29345486	A	G	LOC100261080	XP_002283458.2
Chr14	29345493	A	T	LOC100261080	XP_002283458.2
Chr14	29345501	A	G	LOC100261080	XP_002283458.2
Chr14	29381994	A	T	LOC100854089	XP_003633854.1
Chr14	29382262	G	T	LOC100854089	XP_003633854.1
Chr14	29382322	A	T	LOC100854089	XP_003633854.1
Chr15	725826	C	T	LOC100248844	XP_019081052.1
Chr15	728061	C	G	LOC100248844	XP_019081052.1
Chr15	1158125	T	G	LOC109124056	XP_019081141.1
Chr15	1158301	T	A	LOC109124056	XP_019081141.1
Chr15	1987998	G	T	LOC104881743	XP_010661222.1
Chr15	2075125	C	G	LOC100264385	XP_002270130.2
Chr15	2671793	G	A	LOC104881740	XP_010661218.1
Chr15	2671795	G	T	LOC104881740	XP_010661218.1
Chr15	2752554	T	C	LOC100252257	XP_010661216.1
Chr15	3728965	C	T	LOC100249847	XP_010661151.1
Chr15	5123661	G	A	LOC104881757	XP_019081138.1
Chr15	5253413	C	T	LOC100854672	XP_010661273.1
Chr15	5347833	G	A	LOC100854779	XP_003633884.2
Chr15	5958813	A	G	LOC104881770	XP_010661279.1
Chr15	5961767	G	T	LOC109124031	XP_019081078.1
Chr15	5996862	A	C	LOC100258927	XP_003633889.1
Chr15	6021718	G	A	LOC109124032	XP_019081080.1
Chr15	6309905	C	T	LOC104881775	XP_010661287.1
Chr15	6309962	C	T	LOC104881775	XP_010661287.1
Chr15	7295278	G	A	LOC104881780	XP_010661292.1
Chr15	7544844	A	G	LOC100256874	XP_002262785.1
Chr15	9398127	C	G	LOC100267612	XP_010661449.1
Chr15	9408524	G	T	LOC104881844	XP_019081006.1
Chr15	9438740	G	T	LOC100854617	XP_010661473.1
Chr15	9438746	C	A	LOC100854617	XP_010661473.1
Chr15	9438844	G	A	LOC100854617	XP_010661473.1
Chr15	9493703	C	A	LOC109124038	XP_019081090.1
Chr15	9493792	G	A	LOC109124038	XP_019081090.1
Chr15	9493922	G	A	LOC109124038	XP_019081090.1
Chr15	10297155	G	A	LOC109124039	XP_019081092.1
Chr15	10684561	C	A	LOC104881836	XP_010661463.1
Chr15	10684587	A	G	LOC104881836	XP_010661463.1
Chr15	10684590	G	A	LOC104881836	XP_010661463.1
Chr15	10684655	T	A	LOC104881836	XP_010661463.1
Chr15	10698654	G	A	LOC104881835	XP_019081095.1
Chr15	10738159	C	A	LOC109124040	XP_019081096.1
Chr15	12323757	T	C	LOC104881833	XP_010661460.1
Chr15	12323877	T	C	LOC104881833	XP_010661460.1
Chr15	12372385	C	T	LOC100253023	XP_002272026.1
Chr15	12958571	G	A	LOC104881826	XP_010661453.1
Chr15	14415047	G	A	LOC100245349	XP_010661668.1
Chr15	14427324	A	T	LOC100245349	XP_019081194.1
Chr15	14885781	G	T	LOC100260735	XP_019081296.1
Chr15	15584459	C	A	LOC109123996	XP_019081002.1
Chr15	15584480	C	A	LOC109123996	XP_019081002.1
Chr15	15775608	T	C	LOC100259121	XP_010661704.2
Chr15	15885182	C	T	LOC100267685	XP_002270628.3
Chr15	15892588	G	A	LOC100245370	XP_002270594.3
Chr15	15893238	T	C	LOC100245370	XP_002270594.3
Chr15	15982822	A	G	LOC109123998	XP_019081008.1
Chr15	16331944	T	G	LOC100242047	XP_019081256.1
Chr15	16343038	C	A	LOC104881861	XP_010661545.1
Chr15	16652924	A	G	LOC109123988	XP_019080959.1
Chr15	16653013	C	T	LOC109123988	XP_019080959.1
Chr15	16653026	C	A	LOC109123988	XP_019080959.1
Chr15	16653031	G	A	LOC109123988	XP_019080959.1
Chr15	16653076	A	T	LOC109123988	XP_019080959.1
Chr15	16675662	G	A	LOC100248794	XP_010661504.1
Chr15	16675673	G	A	LOC100248794	XP_010661504.1
Chr15	16675674	T	C	LOC100248794	XP_010661504.1
Chr15	17034885	C	G	LOC104881883	XP_010661691.1
Chr15	17268151	C	A	LOC100255258	XP_010661962.1
Chr15	17398789	G	A	LOC100267384	XP_010661950.1
Chr15	17610025	G	A	LOC100852772	XP_019081109.1
Chr15	17710199	G	T	LOC104881966	XP_010662014.1
Chr15	18086783	A	G	LOC100241322	XP_010661910.1
Chr15	18982602	C	T	LOC100265462	XP_002275425.2
Chr15	19145790	C	T	LOC100260183	XP_002275801.1
Chr15	19457023	T	G	LOC100258544	XP_019081115.1
Chr15	19501883	C	T	LOC100267106	XP_010661781.1
Chr15	19543536	G	A	LOC100265369	XP_010661779.2
Chr15	19544386	T	C	LOC100265369	XP_010661779.2
Chr15	19567895	T	C	LOC100261854	XP_002272897.1
Chr15	19707428	G	A	LOC100263719	XP_010661757.1
Chr15	19748376	G	C	LOC100243078	XP_002273091.2
Chr15	19872209	C	T	LOC104881946	XP_010661989.1
Chr15	19957529	A	T	LOC100256854	XP_019081248.1
Chr16	467549	C	A	LOC104881992	XP_010662171.1
Chr16	543548	T	C	LOC100254521	XP_002266994.1
Chr16	1406484	T	C	LOC104881997	XP_010662176.1
Chr16	1421182	G	A	LOC104881998	XP_010662177.1
Chr16	1421194	C	T	LOC104881998	XP_010662177.1
Chr16	1421202	A	C	LOC104881998	XP_010662177.1
Chr16	1907635	T	C	LOC104881978	XP_010662108.1
Chr16	2291439	A	T	LOC100252838	XP_019081686.1
Chr16	2291446	T	G	LOC100252838	XP_019081686.1
Chr16	2321073	A	G	LOC100256288	XP_002275630.1
Chr16	2321079	G	T	LOC100256288	XP_002275630.1
Chr16	4561960	C	T	LOC109124206	XP_019081557.1
Chr16	4738964	G	A	LOC104882054	XP_010662280.1
Chr16	4739352	C	A	LOC104882054	XP_010662280.1
Chr16	4824706	G	C	LOC100251187	XP_019081467.1
Chr16	5005547	G	C	LOC104882059	XP_010662286.1
Chr16	5013502	C	G	LOC104882060	XP_010662287.1
Chr16	5187061	A	T	LOC104882063	XP_010662291.1
Chr16	6706667	G	C	LOC100259725	XP_002281912.1
Chr16	7015895	C	G	LOC100251162	XP_003634026.2
Chr16	7015967	C	T	LOC100251162	XP_003634026.2
Chr16	7433140	C	A	LOC104882081	XP_019081476.1
Chr16	7455338	T	G	LOC104882082	XP_019081478.1
Chr16	7455464	A	T	LOC104882082	XP_019081478.1
Chr16	7790476	C	A	LOC100268108	XP_019081480.1
Chr16	7920479	G	A	LOC104882085	XP_019081483.1
Chr16	7920485	C	T	LOC104882085	XP_019081483.1
Chr16	7920500	G	C	LOC104882085	XP_019081483.1
Chr16	7956563	C	T	LOC100266216	XP_002264064.1
Chr16	7958242	G	A	LOC100266216	XP_002264064.1
Chr16	7958299	C	T	LOC100266216	XP_002264064.1
Chr16	8593686	G	A	LOC100855408	XP_003634027.1
Chr16	8708690	C	T	LOC100250918	XP_010662268.1
Chr16	9270834	T	C	LOC104882094	XP_010662328.1
Chr16	9270844	C	T	LOC104882094	XP_010662328.1
Chr16	9271078	C	T	LOC104882094	XP_010662328.1
Chr16	9931602	T	A	LOC109124167	XP_019081488.1
Chr16	10195639	C	T	LOC100854289	XP_010662330.1
Chr16	11039015	G	A	LOC100253626	XP_019081829.1
Chr16	12489695	T	C	LOC104882109	XP_010662401.2
Chr16	12489699	C	T	LOC104882109	XP_010662401.2
Chr16	12489711	C	T	LOC104882109	XP_010662401.2
Chr16	13380099	A	G	LOC100250930	XP_002264835.1
Chr16	13710329	C	T	LOC100246431	XP_002267632.1
Chr16	13817977	G	A	LOC100254849	XP_010662458.1
Chr16	14250332	C	T	LOC100263566	XP_010662456.2
Chr16	15162225	C	T	LOC100243906	XP_019081442.1
Chr16	15307994	G	A	LOC100853805	XP_010662562.1
Chr16	15406469	T	C	LOC100853663	XP_010662558.1
Chr16	16492013	C	T	LOC100853406	XP_003634068.1
Chr16	16511751	G	A	LOC100242903	XP_002264989.1
Chr16	17024478	G	C	LOC104882202	XP_010662755.1
Chr16	17025012	T	C	LOC104882202	XP_010662755.1
Chr16	17054937	A	G	LOC104882200	XP_019081372.1
Chr16	17054958	T	C	LOC104882200	XP_019081372.1
Chr16	17106927	G	A	LOC100261929	XP_003634127.2
Chr16	17732065	C	T	LOC100264629	XP_002272322.1
Chr16	17732071	G	A	LOC100264629	XP_002272322.1
Chr16	17813727	C	A	LOC100266267	XP_003634097.1
Chr16	18234762	T	C	LOC104882188	XP_019081571.1
Chr16	18234781	T	A	LOC104882188	XP_019081571.1
Chr16	18234783	A	T	LOC104882188	XP_019081571.1
Chr16	18269747	T	A	LOC104882216	XP_010662792.1
Chr16	18474430	A	C	LOC100262982	XP_002274689.1
Chr16	18477050	T	A	LOC100262982	XP_002274689.1
Chr16	18511329	A	G	LOC104882211	XP_010662786.1
Chr16	18631782	A	G	LOC100257702	XP_010662662.1
Chr16	18851904	G	A	LOC100853486	XP_010662782.1
Chr16	18903465	A	G	LOC100247451	XP_019081559.1
Chr16	18903480	C	A	LOC100247451	XP_019081559.1
Chr16	18945479	G	C	LOC100254307	XP_010662639.1
Chr16	18946961	A	G	LOC100254307	XP_010662639.1
Chr16	18947345	T	C	LOC100254307	XP_010662639.1
Chr16	19004905	T	A	LOC100260469	XP_010662781.1
Chr16	19060518	T	C	LOC100245099	XP_010662631.2
Chr16	19061816	G	T	LOC100245099	XP_010662631.2
Chr16	19061993	T	C	LOC100245099	XP_010662631.2
Chr16	19411573	G	A	LOC109124193	XP_019081536.1
Chr16	19660948	C	T	LOC100855089	XP_019081537.1
Chr16	19718226	C	T	LOC100854711	XP_019081539.1
Chr16	19746682	T	C	LOC100854640	XP_010662565.1
Chr16	19913985	C	G	LOC100242248	XP_010662813.1
Chr16	19915928	C	A	LOC100853733	XP_019081733.1
Chr16	20008431	C	G	LOC100853763	XP_010662817.1
Chr16	20008476	T	G	LOC100853763	XP_010662817.1
Chr16	20193286	G	A	LOC109124232	XP_019081618.1
Chr16	20283689	C	G	LOC100264416	XP_019081644.1
Chr16	20828951	G	A	LOC100258962	XP_002268653.1
Chr16	20887171	C	G	LOC100257345	XP_010662963.1
Chr16	20887175	T	G	LOC100257345	XP_010662963.1
Chr16	20887181	C	T	LOC100257345	XP_010662963.1
Chr16	21131538	C	A	LOC100241862	XP_002269275.1
Chr16	21259766	G	C	LOC100853897	XP_019081569.1
Chr16	21422410	C	G	LOC100264034	XP_002273195.2
Chr16	21422861	G	A	LOC100264034	XP_002273195.2
Chr16	21422873	C	G	LOC100264034	XP_002273195.2
Chr17	500208	A	T	LOC100257713	XP_019081971.1
Chr17	1007196	A	G	LOC100252448	XP_003634216.1
Chr17	1154796	T	C	LOC100264631	XP_019081932.1
Chr17	1577390	G	C	LOC109124300	XP_019081934.1
Chr17	1577772	T	C	LOC109124300	XP_019081934.1
Chr17	1577832	G	A	LOC109124300	XP_019081934.1
Chr17	2067848	T	C	LOC100255980	XP_010663893.1
Chr17	2068271	G	C	LOC100255980	XP_010663893.1
Chr17	2068292	C	G	LOC100255980	XP_010663893.1
Chr17	2087590	C	T	LOC100261069	XP_002278590.1
Chr17	2087604	C	T	LOC100261069	XP_002278590.1
Chr17	2088392	C	G	LOC100261069	XP_002278590.1
Chr17	2092549	T	C	LOC100243949	XP_019082224.1
Chr17	2104807	T	G	LOC109124293	XP_019081913.1
Chr17	2104822	C	T	LOC109124293	XP_019081913.1
Chr17	2369492	A	G	LOC100853858	XP_003634202.1
Chr17	2678343	C	A	LOC100259333	XP_010663656.1
Chr17	2897456	G	A	LOC100242377	XP_019082058.1
Chr17	2908030	G	C	LOC100252619	XP_019081938.1
Chr17	3428946	C	T	LOC100264526	XP_002276557.3
Chr17	4922349	C	T	LOC100254141	XP_002269355.1
Chr17	4922353	T	C	LOC100254141	XP_002269355.1
Chr17	5820914	G	A	LOC104882410	XP_010663876.1
Chr17	5820943	C	T	LOC104882410	XP_010663876.1
Chr17	5820950	T	C	LOC104882410	XP_010663876.1
Chr17	5820964	A	G	LOC104882410	XP_010663876.1
Chr17	6081713	C	A	LOC100248440	XP_002271173.1
Chr17	6081721	T	C	LOC100248440	XP_002271173.1
Chr17	6433218	G	C	LOC104882405	XP_010663868.1
Chr17	6967697	T	A	LOC100246665	XP_002284835.1
Chr17	6978052	G	T	LOC100251801	XP_002284825.1
Chr17	7429013	T	C	LOC100241642	XP_010663322.1
Chr17	7703891	T	A	LOC100260418	XP_019082092.1
Chr17	7802965	T	G	LOC100255230	XP_002281187.1
Chr17	7803021	T	C	LOC100255230	XP_002281187.1
Chr17	7911121	G	T	LOC100262180	XP_010663273.1
Chr17	7939915	A	G	LOC100265641	XP_010663262.1
Chr17	7939935	G	C	LOC100265641	XP_010663262.1
Chr17	7939969	G	A	LOC100265641	XP_010663262.1
Chr17	7943869	C	T	LOC100265641	XP_010663262.1
Chr17	7943895	T	C	LOC100265641	XP_010663262.1
Chr17	7943910	G	T	LOC100265641	XP_010663262.1
Chr17	7970590	T	A	LOC100248444	XP_002280975.2
Chr17	8035429	A	G	LOC100263810	XP_002284151.1
Chr17	8368169	T	G	LOC100250236	XP_002283967.2
Chr17	8368187	C	T	LOC100250236	XP_002283967.2
Chr17	8936235	T	C	LOC104882395	XP_010663850.1
Chr17	8936253	G	A	LOC104882395	XP_010663850.1
Chr17	9652931	G	A	LOC104882389	XP_010663842.1
Chr17	9652949	G	A	LOC104882389	XP_010663842.1
Chr17	10195223	A	G	LOC100265372	XP_002263464.1
Chr17	11111372	C	A	LOC104882272	XP_019081928.1
Chr17	11115871	A	G	LOC100854961	XP_019081956.1
Chr17	11298149	C	T	LOC104882382	XP_019081958.1
Chr17	11655193	A	G	LOC104882379	XP_010663825.2
Chr17	11655218	C	T	LOC104882379	XP_010663825.2
Chr17	13612851	G	A	LOC104882424	XP_010663910.1
Chr17	16258751	C	T	LOC109124290	XP_019081910.1
Chr17	16693693	C	T	LOC104882433	XP_019081852.1
Chr18	963152	G	C	LOC100263329	XP_002272226.1
Chr18	1056359	A	G	LOC100244431	XP_002271954.2
Chr18	1056366	G	A	LOC100244431	XP_002271954.2
Chr18	1397339	C	A	LOC109121641	XP_019071948.1
Chr18	1397366	A	G	LOC109121641	XP_019071948.1
Chr18	1611728	C	T	LOC100264310	XP_002285900.1
Chr18	1611734	C	T	LOC100264310	XP_002285900.1
Chr18	1611741	C	T	LOC100264310	XP_002285900.1
Chr18	1886219	C	T	LOC100259095	XP_002284700.2
Chr18	2339022	A	C	LOC100266161	XP_002284607.2
Chr18	2339056	G	A	LOC100266161	XP_002284607.2
Chr18	2339074	C	T	LOC100266161	XP_002284607.2
Chr18	2339092	G	A	LOC100266161	XP_002284607.2
Chr18	2339100	G	C	LOC100266161	XP_002284607.2
Chr18	2339109	T	C	LOC100266161	XP_002284607.2
Chr18	2516732	C	T	LOC100266052	XP_002284556.1
Chr18	2670957	C	T	LOC100260874	XP_010664193.1
Chr18	2670967	C	T	LOC100260874	XP_010664193.1
Chr18	3644814	C	T	LOC100262519	XP_010664264.1
Chr18	4052651	T	C	LOC100252269	XP_010664300.1
Chr18	4104751	C	T	LOC100247288	XP_010664303.1
Chr18	4105253	C	T	LOC100247288	XP_010664303.1
Chr18	5065639	C	A	LOC100242048	XP_002285728.2
Chr18	5140392	T	C	LOC100262565	XP_002285719.1
Chr18	5344317	G	T	LOC100248818	XP_002285709.1
Chr18	5861925	C	T	LOC100245507	XP_010664417.1
Chr18	6247203	G	A	LOC100255704	XP_010664436.1
Chr18	6903861	G	C	LOC109121713	XP_019072402.1
Chr18	7088642	C	T	LOC100260890	XP_002283504.2
Chr18	8192822	T	G	LOC100245415	XP_002283069.1
Chr18	8192823	C	T	LOC100245415	XP_002283069.1
Chr18	8753431	G	A	LOC100262697	XP_010664566.1
Chr18	8928189	T	C	LOC100853407	XP_019071858.1
Chr18	9812887	C	T	LOC104882609	XP_019071862.1
Chr18	9812900	C	T	LOC104882609	XP_019071862.1
Chr18	9814741	C	T	LOC104882609	XP_019071862.1
Chr18	10167713	T	C	LOC109121595	XP_019071864.1
Chr18	10271374	A	T	LOC100243820	XP_002281733.1
Chr18	10395634	C	T	LOC100260826	XP_002281605.1
Chr18	10396105	C	A	LOC100260826	XP_002281605.1
Chr18	10396111	T	G	LOC100260826	XP_002281605.1
Chr18	10580305	C	T	LOC100252335	XP_010664679.1
Chr18	11234356	T	C	LOC104882612	XP_010664948.1
Chr18	11357445	T	C	LOC100247127	XP_002280873.1
Chr18	12248082	A	G	LOC104882615	XP_010664954.1
Chr18	12335813	G	T	LOC100853433	XP_003634464.2
Chr18	12632652	G	A	LOC104882618	XP_010664957.1
Chr18	12634653	C	A	LOC109121658	XP_019071988.1
Chr18	12955696	C	G	LOC100262607	XP_002269356.2
Chr18	12994720	G	C	LOC100245451	XP_002268860.1
Chr18	13617252	G	A	LOC100255873	XP_002264795.1
Chr18	13952244	G	A	LOC100255549	XP_019071875.1
Chr18	15046939	A	T	LOC109121606	XP_019071881.1
Chr18	15066887	C	A	LOC109121607	XP_019071882.1
Chr18	15066910	G	A	LOC109121607	XP_019071882.1
Chr18	15067253	C	A	LOC109121607	XP_019071882.1
Chr18	15155550	T	C	LOC109121608	XP_019071883.1
Chr18	16654253	T	C	LOC104882649	XP_010665038.1
Chr18	16962481	A	C	LOC109121615	XP_019071887.1
Chr18	16963457	C	T	LOC109121615	XP_019071887.1
Chr18	18179151	G	A	LOC109121620	XP_019071892.1
Chr18	18179167	G	A	LOC109121620	XP_019071892.1
Chr18	18179214	C	T	LOC109121620	XP_019071892.1
Chr18	18181555	G	C	LOC109121620	XP_019071892.1
Chr18	18807075	G	A	LOC104882666	XP_010665063.1
Chr18	18807100	T	C	LOC104882666	XP_010665063.1
Chr18	18807135	T	G	LOC104882666	XP_010665063.1
Chr18	21144008	T	A	LOC104882701	XP_010665217.2
Chr18	21144027	C	T	LOC104882701	XP_010665217.2
Chr18	21721799	C	T	LOC104882705	XP_010665223.2
Chr18	22016243	A	G	LOC104882707	XP_010665224.1
Chr18	22016258	G	A	LOC104882707	XP_010665224.1
Chr18	22016280	C	T	LOC104882707	XP_010665224.1
Chr18	22016295	G	T	LOC104882707	XP_010665224.1
Chr18	22273740	T	C	LOC100256018	XP_002265415.1
Chr18	22593416	G	A	LOC104882709	XP_010665229.1
Chr18	22594493	T	C	LOC104882709	XP_010665229.1
Chr18	23016843	A	G	LOC100268050	XP_002267700.1
Chr18	23073061	C	T	LOC100263169	XP_010665294.2
Chr18	23109686	A	T	LOC100251142	XP_019071994.1
Chr18	23928986	A	G	LOC100855349	XP_019071964.1
Chr18	23928987	T	C	LOC100855349	XP_019071964.1
Chr18	24020037	G	A	LOC100248240	XP_002271713.1
Chr18	24130701	C	T	LOC100256879	XP_019071807.1
Chr18	24252819	A	G	LOC100264863	XP_019071906.1
Chr18	24260156	A	C	LOC104882792	XP_010665469.1
Chr18	24275674	A	G	LOC100259679	XP_010665428.2
Chr18	24275691	C	A	LOC100259679	XP_010665428.2
Chr18	24590672	C	A	LOC100855211	XP_010665418.1
Chr18	24592614	T	C	LOC100855211	XP_010665418.1
Chr18	24598020	C	G	LOC109121633	XP_019071911.1
Chr18	24598037	C	G	LOC109121633	XP_019071911.1
Chr18	24598038	C	G	LOC109121633	XP_019071911.1
Chr18	24633531	T	C	LOC100261322	XP_019071771.1
Chr18	24633543	T	A	LOC100261322	XP_019071771.1
Chr18	24872280	G	A	LOC100247827	XP_002265124.2
Chr18	24872476	C	T	LOC100247827	XP_002265124.2
Chr18	24957120	C	T	LOC100854725	XP_019072011.1
Chr18	25053358	T	G	LOC104882760	XP_010665401.1
Chr18	25081984	T	A	LOC104882759	XP_010665398.1
Chr18	25129430	C	G	LOC100249450	XP_010665396.1
Chr18	25164627	C	T	LOC100266627	XP_002265992.2
Chr18	25164642	C	T	LOC100266627	XP_002265992.2
Chr18	25196240	C	A	LOC100251178	XP_010665394.2
Chr18	25334547	T	A	LOC100249347	XP_002272345.1
Chr18	25929719	C	T	LOC104882751	XP_019072111.1
Chr18	26160712	C	A	LOC100263700	XP_019071919.1
Chr18	26160727	T	C	LOC100263700	XP_019071919.1
Chr18	26190452	A	C	LOC100251701	XP_019071920.1
Chr18	26190453	T	A	LOC100251701	XP_019071920.1
Chr18	26317448	G	C	LOC100246475	XP_002279608.1
Chr18	26361456	A	G	LOC100256743	XP_010665446.1
Chr18	26365762	T	C	LOC100261835	XP_002279564.1
Chr18	26468960	C	T	LOC104882743	XP_019071984.1
Chr18	26581984	G	C	LOC100255078	XP_010665343.1
Chr18	27011975	A	G	LOC100249938	XP_019072330.1
Chr18	27198528	G	T	LOC100250034	XP_002278356.1
Chr18	27198717	C	T	LOC100250034	XP_002278356.1
Chr18	27341124	G	C	LOC104882737	XP_010665310.1
Chr18	27341129	C	A	LOC104882737	XP_010665310.1
Chr18	27341138	T	A	LOC104882737	XP_010665310.1
Chr18	27341140	G	C	LOC104882737	XP_010665310.1
Chr18	27400577	C	G	LOC104882734	XP_019071924.1
Chr18	27863344	A	C	LOC104877471	XP_019072016.1
Chr18	27871907	A	C	LOC104877471	XP_019072016.1
Chr18	27871925	G	A	LOC104877471	XP_019072016.1
Chr18	27874186	A	C	LOC104877471	XP_019072016.1
Chr18	28052880	A	G	LOC104877469	XP_010644038.1
Chr18	28053445	G	T	LOC104877469	XP_010644038.1
Chr18	28215209	A	G	LOC100232974	NP_001267857.1
Chr18	28215331	T	A	LOC100232974	NP_001267857.1
Chr18	28265038	T	C	LOC104877461	XP_010644021.1
Chr18	28577184	C	A	LOC109121700	XP_019072355.1
Chr18	28866655	T	C	LOC104877454	XP_010644000.1
Chr19	796935	A	T	LOC100267526	XP_010644094.1
Chr19	818416	A	T	LOC100250347	XP_002283464.2
Chr19	1740713	C	T	LOC100255658	XP_002283002.1
Chr19	1840859	G	A	LOC100264164	XP_003634635.1
Chr19	1840872	G	A	LOC100264164	XP_003634635.1
Chr19	1840877	C	T	LOC100264164	XP_003634635.1
Chr19	1840887	C	T	LOC100264164	XP_003634635.1
Chr19	1843075	A	G	LOC100264164	XP_003634635.1
Chr19	1843099	G	A	LOC100264164	XP_003634635.1
Chr19	1843111	C	T	LOC100264164	XP_003634635.1
Chr19	1843117	A	G	LOC100264164	XP_003634635.1
Chr19	1873486	C	T	LOC100247013	XP_019072546.1
Chr19	1908269	C	A	LOC100854819	XP_019072547.1
Chr19	1923316	G	A	LOC100257269	XP_002282943.4
Chr19	1929319	A	G	LOC100262382	XP_002282936.1
Chr19	2157008	C	T	LOC100267414	XP_002285222.1
Chr19	2157062	T	A	LOC100267414	XP_002285222.1
Chr19	2231680	A	G	LOC100260618	XP_002282717.1
Chr19	2231683	A	G	LOC100260618	XP_002282717.1
Chr19	2565452	A	G	LOC104877507	XP_010644183.2
Chr19	2976191	T	A	LOC100258876	XP_002284888.2
Chr19	3612863	G	A	LOC100247002	XP_002284596.1
Chr19	3984796	G	C	LOC104877565	XP_019072640.1
Chr19	3991675	G	T	LOC104877566	XP_010644382.1
Chr19	3991810	C	T	LOC104877566	XP_010644382.1
Chr19	3991885	G	A	LOC104877566	XP_010644382.1
Chr19	4311906	C	T	LOC100245158	XP_019072719.1
Chr19	4312741	C	T	LOC100245158	XP_019072719.1
Chr19	4322329	G	A	LOC109121830	XP_019072721.1
Chr19	4322663	C	T	LOC109121830	XP_019072721.1
Chr19	4431724	C	T	LOC100267572	XP_010644272.1
Chr19	4467575	G	A	LOC100255581	XP_019072976.1
Chr19	4734310	C	T	LOC100243545	XP_019072560.1
Chr19	4966999	C	G	LOC100232919	XP_002283286.1
Chr19	4967013	T	A	LOC100232919	XP_002283286.1
Chr19	5138835	G	T	LOC100264159	XP_002283076.1
Chr19	5157343	T	C	LOC100241877	XP_002283070.1
Chr19	5265912	T	C	LOC100245176	XP_019072563.1
Chr19	5329624	C	G	LOC100260605	XP_010644321.1
Chr19	5428624	C	A	LOC100247069	XP_019072981.1
Chr19	5444733	C	T	LOC109121831	XP_019072724.1
Chr19	5444734	T	A	LOC109121831	XP_019072724.1
Chr19	5445377	G	A	LOC109121831	XP_019072724.1
Chr19	5446927	G	A	LOC109121763	XP_019072564.1
Chr19	5768491	C	T	LOC104877545	XP_010644343.1
Chr19	5768683	A	G	LOC104877545	XP_010644343.1
Chr19	6329339	C	A	LOC100255495	XP_010644434.1
Chr19	6603464	G	T	LOC100253811	XP_002278138.1
Chr19	7180054	G	C	LOC104877600	XP_019072894.1
Chr19	7216057	C	T	LOC100241890	XP_002277794.1
Chr19	7498285	A	G	LOC100248725	XP_002276851.1
Chr19	7762965	C	A	LOC100245137	XP_010644520.1
Chr19	8127325	G	T	LOC100242915	XP_002264297.1
Chr19	8127343	C	T	LOC100242915	XP_002264297.1
Chr19	8909282	T	C	LOC100258297	XP_002266700.1
Chr19	9975370	G	C	LOC100853541	XP_010644663.1
Chr19	9996810	T	C	LOC104877635	XP_010644664.1
Chr19	9996816	T	C	LOC104877635	XP_010644664.1
Chr19	9996879	C	A	LOC104877635	XP_010644664.1
Chr19	10319195	C	T	LOC104877676	XP_010644749.2
Chr19	10319270	T	C	LOC104877676	XP_010644749.2
Chr19	10319290	G	C	LOC104877676	XP_010644749.2
Chr19	15366639	G	A	LOC104877707	XP_019072593.1
Chr19	15823461	G	A	LOC109121783	XP_019072594.1
Chr19	16267149	G	A	LOC109121784	XP_019072595.1
Chr19	16268721	A	C	LOC109121784	XP_019072595.1
Chr19	17935064	C	A	LOC104877743	XP_010644840.1
Chr19	18070730	G	A	LOC104877789	XP_010645073.1
Chr19	18072167	T	G	LOC104877789	XP_010645073.1
Chr19	18072660	T	C	LOC104877789	XP_010645073.1
Chr19	18072815	G	A	LOC104877789	XP_010645073.1
Chr19	20027310	C	T	LOC104877761	XP_010644982.1
Chr19	20488959	C	T	LOC100852663	XP_019072850.1
Chr19	21138450	C	A	LOC100250862	XP_010644907.2
Chr19	21141403	G	T	LOC100250862	XP_010644907.2
Chr19	21379118	C	T	LOC104877751	XP_019072791.1
Chr19	21379119	A	C	LOC104877751	XP_019072791.1
Chr19	21495421	C	G	LOC100259870	XP_010644892.1
Chr19	21495433	C	T	LOC100259870	XP_010644892.1
Chr19	22066985	G	A	LOC100256445	XP_019072612.1
Chr19	23142244	T	C	LOC100260352	XP_010645107.1
Chr19	23190506	A	G	LOC100250221	XP_003634822.1
Chr19	23481655	G	T	LOC104877801	XP_010645154.1
