# Supplementary material for: Integrative genomic and transcriptomic analyses of a bud sport mutant ‘Jinzao Wuhe’ with the phenotype of large berries in grapevines
Source: PeerJ. 2023 Jan 3;11:e14617. doi: 10.7717/peerj.14617 (PMC9817954; doi:10.7717/peerj.14617)
Supplement: Supplemental Information 8 [file peerj-11-14617-s008.xlsx]

## Sheet: Sheet1
Table S7:The cufflink results of DEGs at four different stages
	Up-regulated	Non-significant	Down-regulated	DEGs
S1	309	16976	619	928
S2	358	16083	483	841
S3	846	13204	781	1627
S4	548	13570	179	727
