# Supplementary material for: Integrative genomic and transcriptomic analyses of a bud sport mutant ‘Jinzao Wuhe’ with the phenotype of large berries in grapevines
Source: PeerJ. 2023 Jan 3;11:e14617. doi: 10.7717/peerj.14617 (PMC9817954; doi:10.7717/peerj.14617)
Supplement: Supplemental Information 10 [file peerj-11-14617-s010.xlsx]

## Sheet: Sheet1
Table S9 The gene list of blue module and brown modules
Blue Module	Brown Module
LOC100256140	LOC100262720
LOC100250979	LOC100262861
LOC109121469	LOC100257577
LOC100249015	LOC100261046
LOC100252517	LOC100268142
LOC100245685	LOC100252628
LOC100257798	LOC100254219
LOC104879009	LOC100262819
LOC100264553	LOC100232937
LOC100266416	LOC104880150
LOC100247541	LOC100261217
LOC109122425	LOC100252552
LOC100256020	LOC100248463
LOC100245676	LOC100267362
LOC100262843	LOC100258721
LOC100250961	LOC100251939
LOC100249140	LOC104879728
LOC100242244	LOC100253093
LOC100262836	LOC100247632
LOC100242324	LOC100240857
LOC100854116	LOC100253460
LOC100256093	LOC104881234
LOC100853085	TL1
LOC100257695	LOC100244525
LOC100262710	LOC100253079
LOC100266215	LOC100267708
LOC100244027	LOC100259122
LOC100267987	LOC104882174
LOC100267978	LOC100256037
LOC100256830	LOC100245427
LOC100263605	LOC100255790
LOC100852797	LOC100258003
LOC100258559	LOC100250277
LOC100267386	LOC100241895
LOC100854096	LOC100258852
LOC100267378	LOC100257225
LOC100241694	LOC100248701
LOC100265355	LOC100262425
LOC100248178	LOC100854929
LOC100258232	LOC100248616
LOC100266640	LOC100853024
LOC100259590	LOC100251483
LOC100259604	LOC100265141
LOC100264789	LOC100245631
LOC100266664	LOC100852789
LOC100259084	LOC100257251
LOC100254080	LOC100260591
LOC100266054	LOC100244413
LOC100854734	LOC104878931
LOC100247256	LOC100251889
LOC100262641	LOC100255284
LOC100245456	LOC100250890
LOC100258700	LOC100242399
LOC100245045	LOC100261100
LOC100243329	LOC100244029
LOC100265552	LOC100252631
LOC100243235	LOC100256163
LOC100248364	LOC104879010
LOC100253481	LOC104879016
LOC100257104	LOC100267884
LOC100258722	LOC100244119
LOC100250089	LOC100242384
LOC100244412	LOC100266429
LOC100249570	LOC100242814
LOC100247886	LOC100246246
LOC100266707	LOC100242728
LOC100259860	LOC100242068
VVYS1	LOC100852802
LOC100242761	LOC104879125
LOC100253026	LOC100247204
LOC100241028	ADH2
LOC100251364	LOC100243051
LOC100254752	LOC100260227
LOC100265051	LOC100255126
LOC100246127	PR10.7
LOC100247977	LOC100241405
LOC100263289	LOC100241482
LOC100263385	LOC100240944
LOC100241085	CIPK19
LOC100265013	LOC100251170
LOC100246096	LOC100246027
LOC100253090	LOC100263193
LOC100258212	LOC100261307
GFH2	LOC100264790
LOC100242743	LOC100263116
LOC100852547	LOC100251035
LOC100262648	LOC100250447
LOC100267804	LOC100255642
LOC100243757	LOC100242998
LOC100250600	LOC100252695
LOC100267737	LOC100241560
LOC100267793	LOC100253656
LOC100262584	LOXA
LOC100248894	LOC100853565
LOC100253987	LOC100255372
LOC104882552	LOC100255251
LOC100261851	LOC100265697
LOC104882693	LOC100246740
LOC100257894	LOC100251984
LOC100247636	LOC100257005
LOC100252842	LOC100250042
LOC100245856	LOC100261566
HYD2	LOC109122751
LOC100254598	LOC100265368
LOC100260651	LOC100263698
LOC100255460	LOC100256741
LOC100253771	LOC104879730
LOC100253710	LOC100253468
LOC100264136	LOC100852937
LOC100250259	LOC100263127
LOC100245139	LOC100252941
LOC100258952	LOC100267613
LOC100232985	LOC104879789
LOC100241875	LOC100245280
LOC104877917	LOC100257315
LOC100241765	LOC100250396
IFRL5	LOC100252171
LOC100241832	LOC100260673
LOC100264205	LOC100254997
LOC100257333	LOC100254904
LOC100245165	LOC100242917
LOC100252181	LOC100251558
LOC100265900	LOC100262963
LOC100250402	LOC100242185
LOC104878791	LOC100259470
LOC100265761	LOC100251912
LOC100267586	LOC100244898
LOC100253713	LOC100250551
LOC100267479	LOC100259051
LOC100262358	LOC100251671
LOC100855200	LOC100255017
LOC100249018	LOC100261951
LOC100245601	LOC100244812
LOC100241306	LOC100253412
LOC100263403	LOC100258555
LOC100249727	LOC100259551
LOC100854891	LOC100854994
LOC100853950	GRIP21
LOC100241199	LOC100240931
LOC100253281	LOC100261261
LOC104878911	LOC100264838
LOC100243488	LOC100247748
LOC100248624	LOC100256294
LOC100253491	LOC100254577
LOC104878964	LOC100264066
LOC100266178	LOC104880119
LOC100243924	LOC100267590
LOC100268063	LOC100250331
LOC100266315	LOC100251577
LOC100268056	LOC100265183
LOC100256096	LOC100259980
LOC100245801	LOC100256666
LOC100260963	LOC100260001
LOC100244044	LOC104880304
LOC100254385	LOC100241136
LOC100261144	LOC100258352
LOC100259490	LOC100256729
LOC100244135	LOC100253480
LOC100852414	LOC100251833
LOC100266281	LOC100853464
LOC100245739	THI1.2
LOC100265510	LOC100246851
LOC100253065	LOC100248583
LOC100246195	LOC100255611
LOC100262160	LOC100853501
LOC100257053	LOC100853452
LOC100267316	LOC100252176
LOC100259906	LOC100247041
LOC100242709	LOC100260521
LOC100264999	LOC100252168
LOC100232848	LOC100264074
LOC100247095	LOC104880541
LOC109122432	LOC100257231
LOC100264253	LOC100265752
LOC100247111	LOC104880563
LOC104879121	LOC100258062
LOC100267946	LOC100266208
LOC100255715	LOC104880619
LOC100257411	LOC100244113
LOC100242028	GER6
LOC100267164	LOC100259328
LOC100249955	LOC100247568
LOC100260212	LOC100260997
LOC100255010	LOC100262713
LOC100853348	LOC100247336
LOC100241383	LOC100255957
LOC100260115	LOC100268134
LOC100258513	LOC100258760
PR10.3	LOC100243678
LOC100255033	LOC100256457
LOC100260209	LOC100242781
LOC100258504	LOC100255766
LOC100252933	LOC100266042
LOC100263041	LOC100247528
LOC100242564	LOC100242144
LOC100259559	LOC100256792
LOC100245862	LOC100233045
LOC104879247	LOC100266600
LOC100261454	LOC100247755
LOC100244275	LOC100265929
LOC109122557	LOC100252276
LOC100252916	LOC100248433
LOC100251046	LOC100853941
LOC100259653	LOC100261497
LOC100252909	LOC100253085
LOC100259648	LOC100265113
LOC100245936	LOC104881112
LOC100264939	LOC100242723
LOC100252939	LOC100248183
LOC100240909	LOC100259102
LOC100247822	LOC100257397
LOC100259740	LOC100266045
LOC100252920	LOC100248873
LOC100244356	LOC100244589
LOC100241904	LOC104881300
LOC100262385	LOC104881332
LOC100263523	LOC100855101
LOC100261667	LOC109121430
LOC100258367	LOC104881303
LOC100854828	LOC100242579
LOC100254364	LOC100247715
LOC100245626	LOC100266479
LOC109122648	LOC100249500
LOC100255318	LOC100251008
LOC100258679	LOC100252793
LOC100255211	LOC100264841
LOC100263949	LOC100245905
LOC100255325	LOC100241803
LOC100258789	LOC100257170
LOC100255221	LOC100267205
LOC100265516	LOC100257904
LOC100250068	LOC100265534
LOC100241690	LOC104881591
LOC100241571	LOC100250218
GRIP22	LOC109123822
LOC100233065	LOC100261795
LOC104879566	LOC100241313
LOC100260311	LOC100265199
LOC100248374	LOC100242999
LOC100250080	LOC100251407
LOC100262095	LOC100244128
LOC109122806	LOC100254241
CTR6	LOC100266391
LOC100245101	LOC100853271
LOC100241504	LOC100252611
LOC100265583	LOC100253773
LOC100263882	LOC100259767
LOC100262223	LOC100266067
LOC100257036	LOC100264301
LOC100258727	LOC100261908
LOC100263377	LOC100246456
LOC104879665	LOC100255094
LOC100266702	LOC100259640
LOC100242686	X4CL
LOC100853566	LOC100247770
LOC100249993	LOC104882120
LOC100243073	LOC100260301
LOC100248187	LOC100241682
LOC100260228	LOC100256970
LOC100258458	LOC100241164
LOC100249900	LOC100261661
LOC100251777	LOC100257557
LOC100261833	LOC100256632
LOC100260258	LOC100262858
LOC100260331	LOC100243904
LOC100257100	LOC100267290
LOC100263879	LOC100853763
LOC104879729	LOC100262465
LOC100255248	LOC100241862
LOC100253485	LOC100252122
LOC100264878	LOC100258861
LOC104879748	LOC100232957
LOC100852532	LOC100262849
LOC100853449	LOC100257659
LOC100242600	LOC100255963
LOC104879779	LOC100262718
LOC100247629	LOC100260995
LOC109122929	LOC100264717
LOC100242506	LOC100852784
LOC100250437	LOC100242382
LOC100243466	LOC100242243
LOC100253698	LOC104882330
LOC100260568	LOC100854093
LOC100257320	LOC100251801
LOC100245304	LOC100257078
LOC100247060	LOC100241707
LOC100245167	LOC100253569
LOC100267577	LOC104882284
LOC100252201	LOC100246781
LOC100855136	LOC100255885
LOC100264006	LOC100261556
LOC100264000	LOC100244431
LOC100255480	LOC100250620
LOC100263560	LOC104882457
MYB14	FLS1
LOC100254562	LOC100267713
LOC100241465	LOC100252269
LOC100853965	LOC100854472
LOC100855319	LOC100255713
LOC100242338	LOC100242048
LOC100266458	LOC100854998
LOC100262817	LOC100257555
LOC100254242	LOC100245416
LOC100263656	LOC100262564
LOC100854604	LOC100253922
LOC104879927	LOC100250659
LOC100250895	LOC100248833
LOC100259386	LOC100245545
LOC100250696	LOC100245555
LOC104879953	LOC100248962
LOC104879960	LOC100259186
LOC100267301	LOC100267750
LOC100241637	LOC100245344
LOC100266829	LOC100248853
LOC100260891	LOC100260737
LOC100246625	LOC100243742
LOC100255050	LOC100259201
LOC104880093	LOC100251262
LOC100260246	LOC104882682
LOC100260104	LOC100262413
LOC100258578	LOC100248251
LOC100241377	LOC104877452
LOC100265482	LOC100262369
LOC100265405	LOC100245111
LOC104880048	LOC100267572
LOC100265489	LOC100267424
LOC100261866	LOC100258992
LOC100244737	LOC100265876
LOC100263625	LOC100255502
LOC109123044	LOC100250445
LOC100249439	LOC100260620
LOC100254427	LOC100265189
LOC100249316	LOC100258180
LOC100245981
LOC100240808
LOC100257936
LOC100256304
LOC104880159
LOC100242499
LOC100264776
LOC100853778
LOC100259738
LOC100267442
LOC100267549
LOC100246895
LOC100243497
LOC100852723
G1
LOC100233076
LOC100265920
GDHB
LOC100265797
LOC100241935
LOC100232865
LOC100262351
LOC100255477
LOC100258928
LOC100252116
LOC100255467
LOC100245312
LOC100262460
LOC100251413
LOC100253135
LOC100263428
LOC100266896
LOC100244575
LOC100246362
LOC100259945
LOC100244602
LOC100241282
LOC100242977
LOC100248102
LOC100233007
LOC104880223
LOC100266874
HP2
LOC100243009
LOC100261674
LOC100267000
LOC100256715
LOC100246445
LOC100248007
LOC100244693
LOC100252579
LOC100242170
LOC100251699
LOC100259994
CIPK02
LOC100251623
LOC100265463
LOC100246729
LOC100251973
LOC100255236
LOC100265643
LOC109123183
LOC100251259
LOC100263288
LOC100261598
LOC104880450
LOC100258941
LOC104880463
LOC100252054
LOC100253865
LOC100248671
LOC100241806
LOC100243523
LOC100246411
LOC100244549
CIPK16
LOC100261772
LOC100246308
LOC100263543
LOC100260650
LOC100265745
LOC100255578
LOC100249695
LOC104880516
LOC100260008
LOC100263534
LOC100854662
LOC100254822
LOC100253161
LOC100247557
LOC104877323
LOC100262909
LOC100264744
LOC100254557
LOC100256326
LOC100263121
LOC100240855
LOC100252832
LOC100251557
LOC100242940
LOC100263558
LOC100254231
LOC100250788
LOC109123420
LOC100262821
LOC100264512
LOC100242363
LOC100249262
LOC100243880
LOC100264581
LOC100254286
LOC109121390
LOC100266427
LOC100268083
LOC100242430
LOC100266265
LOC100250904
LOC100854924
LOC100257654
LOC100266327
LOC100255960
LOC100252508
LOC100241955
LOC100257854
LOC100263642
SIUP1
LOC100241931
LOC100265878
LOC100265762
LOC100244999
LOC104877289
LOC100266954
LOC100241546
CYP716A15
LOC104880753
LOC100245404
LOC100255720
LOC100245233
LOC100244514
LOC100254783
LOC104880789
LOC100254698
LOC100241056
LOC100263324
LOC100252949
LOC100256515
LOC100259123
LOC100260926
LOC100247105
LOC100853556
LOC100255689
LOC100243731
LOC100259255
LOC100257395
LOC100248923
LOC100257429
LOC100260198
LOC100260129
LOC100248217
LOC100256762
LOC100261876
ACO2
LOC100260207
LOC100263742
LOC104880881
LOC100241457
LOC100244716
LOC100246598
LOC100261396
LOC100263140
LOC100247673
LOC100263064
LOC100245897
LOC100244345
LOC100853006
LOC100259620
LOC100263071
LOC100242530
LOC100262089
LOC100255538
LOC100250360
LOC100262371
LOC100265935
LOC100854937
LOC100265260
LOC100255940
LOC100266411
LOC100252582
LOC100255705
LOC100243755
LOC100233113
LOC100255226
LOC100251838
LOC100245010
LOC100246676
LOC100245026
LOC100257029
LOC100248430
LOC100261526
LOC100246192
LOC100242732
LOC100261491
LOC100251245
LOC100266698
LOC100244414
LOC100256525
LOC100263317
LOC100251314
LOC100249618
LOC100265038
LOC100251231
LOC100259822
LOC100263369
LOC100265438
LOC100254987
LOC100854267
LOC100256802
LOC100255038
LOC100853803
LOC100249968
LOC100253394
LOC100852428
LOC100252836
LOC100254566
LOC100263212
LOC104881350
LOC100245930
LOC100264849
LOC100251129
LOC104881392
LOC100242631
LOC100257908
LOC100244347
LOC109123818
LOC100242551
LOC100249438
LOC100240968
LOC100261443
LOC104881433
LOC100852422
LOC100243532
LOC100262295
LOC100267439
LOC100265702
LOC104881519
LOC100265304
LOC100246645
LOC100252958
LOC100249652
LOC100253189
LOC100853032
LOC104881611
LOC100251581
LOC100249810
LOC100266848
LOC100259969
LOC100261814
LOC100265266
LOC100265200
LOC100251434
LOC100266440
LOC100249110
LOC100262761
LOC100245735
LOC100268167
LOC100267902
LOC100256128
LOC100243933
LOC100261203
MYB24
LOC100254332
LOC100259439
LOC100244055
LOC100266380
LOC100853126
LOC100250761
LOC100245627
LOC100250998
LOC100243953
LOC100257486
LOC100243849
LOC100263313
LOC100263389
LOC100265053
LOC100247928
LOC100264963
LOC100254818
LOC100253046
LOC100242036
LOC100262551
LOC100259034
MADS3
LOC100243647
LOC100257406
LOC100259130
LOC100255690
LOC100255716
LOC100265990
LOC100260872
LOC100265555
LOC100250031
LOC100249906
LOC100265354
LOC100261943
LOC104881953
LOC100242511
LOC100257926
LOC100264930
LOC104882061
LOC104882062
LOC100252930
LOC100261260
LOC100266344
LOC100260413
LOC100253548
LOC100244033
LOC100256609
LOC100244570
LOC100255607
LOC100853590
LOC104882225
LOC100247339
LOC100264629
LOC100257736
LOC100247478
LOC100254171
LOC100247451
CHIT3
LOC100251796
LOC100233044
LOC100252559
LOC100258962
LOC100854885
LOC100264126
LOC100853897
LOC100267630
LOC100264034
LOC100266238
LOC104882374
LOC100262834
LOC100267921
LOC100267995
LOC100252657
LOC100268010
LOC100243949
LOC109124293
LOC100249181
LOC100247357
LOC100853765
MIR159C
LOC100266447
LOC100259493
LOC100247520
LOC100247427
LOC100245622
LOC100245724
LOC100244020
LOC100268098
LOC100258803
LOC100253660
LOC109124329
LOC100263850
LOC100262158
LOC104882318
LOC100251824
LOC104882311
LOC100248401
LOC100251924
LOC109121534
LOC104882299
HSP101
LOC100251806
LOC100250236
LOC100257083
LOC100854641
LOC100251811
LOC100265712
LOC100245004
LOC100262226
LOC100262049
LOC100243357
LOC100265684
LOC100265573
LOC100249666
LOC100244516
LOC100247942
LOC100245335
LOC100267810
LOC100250514
LOC100262628
LOC100267819
LOC100249002
LOC100262634
LOC100259145
LOC100257428
LOC100255792
LOC100242128
LOC100264214
LOC100255823
LOC100264219
LOC100245527
LOC100266086
LOC100255834
LOC100267828
LOC100267736
LOC100854033
LOC100252417
LOC100260792
LOC100247092
LOC100252217
LOC100257562
LOC100245540
LOC100243702
LOC100255855
LOC100232856
LOC100257474
LOC100250571
LOC100260826
LOC100854643
LOC100260944
LOC100252354
LOC100253967
LOC100262624
LOC100250572
LOC100853433
LOC100264374
LOC100259232
LOC100247121
LOC100245373
LOC104882634
LOC100264851
LOC100254342
LOC100257198
LOC100852716
LOC100261816
LOC104882728
LOC100251158
LOC100248240
LOC100252816
LOC100853111
LOC100264754
LOC100249943
LOC100253312
LOC100262357
LOC104877492
LOC100255640
LOC100258873
LOC100257171
LOC100257275
LOC100260618
LOC100264065
LOC100255434
LOC100245224
LOC100258876
LOC100255559
LOC100243607
LOC100260599
LOC100267563
LOC100255568
LOC100232954
LOC100253691
LOC100258838
LOC100257237
LOC100267550
LOC100257132
LOC100255629
LOC100249762
LOC100256645
LOC100253239
LOC100256562
LOC100241162
LOC100254980
LOC100258359
LOC100267274
LOC100248372
LOC100250517
LOC100264177
LOC100262772
LOC100242892
LOC100254239
LOC100855352
LOC104877794
LOC100263786
