# Supplementary material for: Integrative genomic and transcriptomic analyses of a bud sport mutant ‘Jinzao Wuhe’ with the phenotype of large berries in grapevines
Source: PeerJ. 2023 Jan 3;11:e14617. doi: 10.7717/peerj.14617 (PMC9817954; doi:10.7717/peerj.14617)
Supplement: Supplemental Information 11 [file peerj-11-14617-s011.xlsx]

## Sheet: Sheet1
	Table S10 Identified important candidate genes harboring differential variants
Pep id	Gene id	Genetic variation information	Description	Paper
XP_002278061.1	LOC100258861	Chr16: 21,978,133: N-]CHR4:11,469,493]N	pectinesterase	(Siddiqui et al., 2020)
XP_002284888.2	LOC100258876	Chr19: 2,976,191: T-A	Belongs to the glycosyl hydrolase 5 (cellulase A) family	(Fasoli et al., 2016)
XP_002271954.2	LOC100244431	Chr18: 1,056,359: A-G; Chr18: 1,056,366: G-A	Belongs to the cytochrome P450 family	(Qi et al., 2017)
XP_002265310.1	LOC100253660	Chr17: 5,602,292: N-N[CHR7:3,174,834[	cytochrome P450
XP_010661587.1	LOC100266067	Chr15: 15,732,629: TTG-T	Belongs to the cytochrome P450 family
XP_010652758.1	LOC100254242	Chr7: 16,027,170: C-T	Belongs to the cytochrome P450 family
XP_002263532.1	LOC100242998	Chr5: 19,000,473: G-C	Belongs to the UDP-glycosyltransferase family	(Dong et al., 2020)
XP_002282717.1	LOC100260618	Chr19: 2,231,680: A-G; Chr19: 2,231,683: A-G	Belongs to the UDP-glycosyltransferase family
XP_002281605.1	LOC100260826	Chr18: 10,395,634: C-T; Chr18: 10,396,105: C-A; Chr18:10,396,111: T-G; Chr18: 10,395,642: N-N[CHR15:14,481,356[	Zinc finger protein	(Zhao et al., 2021)
XP_002267438.1	LOC100250551	Chr8: 7,123,930: G-C; Chr8: 7,123,932: A-T	RING-type E3 ubiquitin transferase	(Xia et al., 2013)
XP_019081559.1	LOC100247451	Chr16: 18,903,465: A-G; Chr16: 18,903,480: C-A	regulation of response to stimulus
XP_010661956.1	LOC100265555	Chr15: 17,301,446: N-]CHR4:2,063,439]N	Auxin response factors (ARFs)	(Tello et al., 2015)
XP_002284825.1	LOC100251801	Chr17: 6,978,052: G-T	(NAC) domain-containing protein	(Li et al., 2022)
XP_002266601.1	LOC100259590	Chr1: 19,530,992: G-A	ABC transporter C family member	-
XP_019082224.1	LOC100243949	Chr17: 2,092,549: T-C	LRR receptor-like serine threonine-protein kinase	(Ye et al., 2017)
XP_002264039.1	LOC100247557	Chr10: 8,989,363: C-A	LRR receptor-like serine threonine-protein kinase	(Ye et al., 2017)
XP_019081913.1	LOC109124293	Chr17: 2,104,807: T-G; Chr17: 2,104,822: C-T	LRR receptor-like serine threonine-protein kinase	(Ye et al., 2017)
XP_010662817.1	LOC100853763	Chr16: 20,008,431: C-G; Chr16: 20,008,476: T-G	receptor-like protein kinase	(Ye et al., 2017)
XP_002268653.1	LOC100258962	Chr16: 20,828,951: G-A	receptor-like protein kinase	(Ye et al., 2017)
XP_010644272.1	LOC100267572	Chr19: 4,431,724: C-T	serine threonine-protein kinase	(Ye et al., 2017)
XP_002277176.2	LOC100266874	Chr9: 2,723,354: A-C; Chr9: 2,725,506: C-G	receptor-like serine threonine-protein kinase	(Ye et al., 2017)
XP_002278051.2	LOC100258928	Chr8: 21,785,773: N-N[CHR1:13,614,145[	Leucine-rich repeat receptor-like tyrosine-protein kinase	(Wang et al., 2019)
XP_010654590.1	LOC104880223	Chr9: 2,699,319: C-A	receptor-like serine threonine-protein kinase	(Ye et al., 2017)
XP_019077797.1	LOC100244602	Chr9: 2,189,561: C-G	inactive protein kinase	(Ye et al., 2017)
XP_002283701.1	LOC100246192	Chr13: 2,773,583: G-A	belongs to the protein kinase superfamily	(Ye et al., 2017)
XP_002285728.2	LOC100242048	Chr18: 5,065,639: C-A	Belongs to the multi antimicrobial extrusion (MATE) (TC 2.A.66.1) family	(Suzuki et al., 2015)
XP_002285693.1	LOC100245527	Chr18: 5,605,523: AG-A	Belongs to the mitochondrial carrier (TC 2.A.29) family	-
XP_019081569.1	LOC100853897	Chr16: 21,259,766: G-C	termination of mitochondrial transcription	-
XP_002273195.2	LOC100264034	Chr16: 21,422,410: C-G; Chr16: 21,422,861: G-A; Chr16: 21,422,873: C-G	termination of mitochondrial transcription	-
NP_001267871.1	ACO2	Chr12: 6,311,713: C-A	Belongs to the iron ascorbate-dependent oxidoreductase family	-
XP_002282216.1	LOC100233065	Chr6: 3,843,123: C-T; Chr6: 3,843,131: G-T; Chr6: 3,843,862: N-N[CHR4:19,762,635[	Sec61beta family	-
XP_002269275.1	LOC100241862	Chr16: 21,131,538: C-A	cellular transition metal ion homeostasis	-
XP_002271713.1	LOC100248240	Chr18: 24,020,037: G-A	Belongs to the multicopper oxidase family	-
XP_010664300.1	LOC100252269	Chr18: 4,052,651: T-C; Chr18: 4,052,505: N-]CHR3:15,467,778]N	Sulfate transporter	-
XP_002272322.1	LOC100264629	Chr16; 17,732,065; C-T; Chr16: 17,732,071: G-A	Hydroxyproline-rich glycoprotein family protein	-
XP_010656471.2	LOC100268134	Chr11: 5,286,697: T-G	galactinol--sucrose galactosyltransferase 6	-
XP_003634464.2	LOC100853433	Chr18: 12,335,813: G-T	-	-
XP_010659051.1	LOC100854267	Chr13: 18,484,097: C-G; Chr13: 18,482,655: GT-G	synthase	-
XP_010651869.1	LOC104879729	Chr6: 20,816,510: A-G	-	-
XP_019077910.1	LOC104880304	Chr9:4,517,323: T-G	F-box kelch-repeat protein	(Li et al., 2011)
