# Supplementary material for: Integrative genomic and transcriptomic analyses of a bud sport mutant ‘Jinzao Wuhe’ with the phenotype of large berries in grapevines
Source: PeerJ. 2023 Jan 3;11:e14617. doi: 10.7717/peerj.14617 (PMC9817954; doi:10.7717/peerj.14617)
Supplement: Supplemental Information 12 [file peerj-11-14617-s012.xlsx]

## Sheet: Sheet1
Table S11 The candidate genes in QTL regions
pep_id	gene_id	P_EL23_1	P_EL23_2	P_EL23_3	V_EL23_1	V_EL23_2	V_EL23_3	P_EL31_1	P_EL31_2	P_EL31_3	V_EL31_1	V_EL31_2	V_EL31_3	P_EL35_1	P_EL35_2	P_EL35_3	V_EL35_1	V_EL35_2	V_EL35_3	P_EL38_1	P_EL38_2	P_EL38_3	V_EL38_1	V_EL38_2	V_EL38_3	release25_id	COG_class	COG_class_annotation	GO_annotation	KEGG_annotation	KEGG_pathway_annotation	KOG_class	KOG_class_annotation	Pfam_annotation	Swiss_Prot_annotation	eggNOG_class	eggNOG_class_annotation	NR_annotation
NP_001267842.1	LOC100263179	20960.1	21280.6	21386.3	24843.8	25302.4	24621.3	2785.25	2900.39	2778.19	3095.68	3285.95	3212.65	1761.74	1560.76	1588.14	1649.68	1841.32	1638.2	11.9533	4.46441	1.39196	9.98082	9.11205	13.9473	VIT_05s0020g04110	--	--	Biological Process: response to cold (GO:0009409);; Cellular Component: chloroplast thylakoid membrane (GO:0009535);; Biological Process: anthocyanin-containing compound biosynthetic process (GO:0009718);; Biological Process: response to sucrose (GO:0009744);; Biological Process: positive regulation of seed germination (GO:0010030);; Biological Process: photoprotection (GO:0010117);; Biological P…	--	--	--	--	Chlorophyll A-B binding protein	Early light-induced protein 1, chloroplastic (Precursor) GN=ELIP1 OS=Arabidopsis thaliana (Mouse-ear cress) PE=1 SV=1	S	Function unknown	uncharacterized protein LOC100263179 [Vitis vinifera]	early light-induced protein
NP_001268149.1	GRIP32	2245.13	2017.91	2057.39	1924.64	1750.54	1766.53	7921.66	7902.39	7717.08	7694.46	8038.9	8020.59	937.589	1032.72	939.123	2569.85	2455.7	2511.12	1235.97	1246.46	1176.21	1920.31	1959.85	1907.29	VIT_08s0056g01610	--	--	--	--	--	--	--	--	--	--	--	unnamed protein product [Vitis vinifera]
NP_001268207.1	HT5	606.52	593.556	554.771	257.96	253.205	269.035	173.429	183.194	162.214	192.668	178.819	110.337	1979.05	2786.24	2779.49	2792.87	2956.88	2882.76	2444.46	2500.07	2545.89	2279.62	2274.21	2155.73	VIT_05s0020g03140	[GEPR]	Carbohydrate transport and metabolism;; Amino acid transport and metabolism;; Inorganic ion transport and metabolism;; General function prediction only	Molecular Function: high-affinity hydrogen:glucose symporter activity (GO:0005358);; Cellular Component: cytoplasm (GO:0005737);; Cellular Component: plasma membrane (GO:0005886);; Cellular Component: integral component of plasma membrane (GO:0005887);; Biological Process: protein folding (GO:0006457);; Biological Process: purine nucleobase transport (GO:0006863);; Molecular Function: sucrose:pro…	--	--	[R]	General function prediction only	Sugar (and other) transporter;; Major Facilitator Superfamily	Sugar transport protein 13 GN=F9D12.17 OS=Arabidopsis thaliana (Mouse-ear cress) PE=1 SV=2	R	General function prediction only	hexose transporter [Vitis vinifera]	Belongs to the major facilitator superfamily. Sugar transporter (TC 2.A.1.1) family
XP_002265439.2	LOC100266002	26.8075	23.2585	39.4387	15.5508	14.2785	5.79461	3205.84	3009.62	3249.7	5517.38	5809.92	5737.53	143.509	112.15	129.603	184.716	241.919	223.141	519.97	544.658	595.759	412.208	478.382	384.422	VIT_08s0105g00180	--	--	Cellular Component: ubiquitin ligase complex (GO:0000151);; Biological Process: MAPK cascade (GO:0000165);; Biological Process: respiratory burst involved in defense response (GO:0002679);; Molecular Function: ubiquitin-protein transferase activity (GO:0004842);; Molecular Function: protein binding (GO:0005515);; Cellular Component: cytosol (GO:0005829);; Biological Process: protein targeting to …	--	--	--	--	U-box domain;; Zinc-finger of the MIZ type in Nse subunit	E3 ubiquitin-protein ligase PUB23 GN=PUB23 OS=Arabidopsis thaliana (Mouse-ear cress) PE=1 SV=1	O	Posttranslational modification, protein turnover, chaperones	PREDICTED: E3 ubiquitin-protein ligase PUB23-like [Vitis vinifera]	RING-type E3 ubiquitin transferase
XP_002266059.1	LOC100256460	54.732	52.099	49.9557	75.9244	62.8253	63.7407	2491.35	2458.9	2501.35	2064.51	3595.75	3765.25	1914.81	1752.35	2055.7	1563.7	1766.46	1657.06	2125.3	2204.53	2065.67	2510.18	2419.25	2398.93	VIT_11s0052g00440	[R]	General function prediction only	Biological Process: polysaccharide biosynthetic process (GO:0000271);; Cellular Component: lytic vacuole (GO:0000323);; Molecular Function: protein binding (GO:0005515);; Cellular Component: mitochondrion (GO:0005739);; Cellular Component: endoplasmic reticulum (GO:0005783);; Biological Process: asymmetric cell division (GO:0008356);; Biological Process: regulation of cell size (GO:0008361);; Bio…	K13947|0|vvi:100256460|K13947 auxin efflux carrier family | (RefSeq) auxin efflux carrier component 2	--	--	--	Membrane transport protein	Auxin efflux carrier component 2 GN=At5g57090 OS=Arabidopsis thaliana (Mouse-ear cress) PE=1 SV=2	P	Inorganic ion transport and metabolism	PREDICTED: auxin efflux carrier component 2 isoform 1 [Vitis vinifera]	May act as a component of the auxin efflux carrier
XP_002266241.1	LOC100266829	11.1698	24.1888	17.0901	32.9311	47.5949	44.7012	871.299	848.838	922.46	954.682	882.707	889.133	61.5037	28.0376	36.887	40.0077	31.9515	35.3568	187.667	188.398	208.794	223.57	230.079	183.058	VIT_08s0032g00510	--	--	Molecular Function: binding (GO:0005488);; Cellular Component: nucleus (GO:0005634);; Cellular Component: cytoplasm (GO:0005737);; Biological Process: amino acid transport (GO:0006865);; Biological Process: defense response (GO:0006952);; Biological Process: metabolic process (GO:0008152);; Biological Process: cell death (GO:0008219);; Biological Process: response to abiotic stimulus (GO:0009628)…	--	--	[V]	Defense mechanisms	alpha/beta hydrolase fold;; Alpha/beta hydrolase family;; Alpha/beta hydrolase family;; Carboxylesterase family	Probable carboxylesterase 15 GN=CXE15 OS=Arabidopsis thaliana (Mouse-ear cress) PE=2 SV=1	V	Defense mechanisms	PREDICTED: probable carboxylesterase 15 [Vitis vinifera]	carboxylesterase 15
XP_002267438.1	LOC100250551	42.4452	42.7956	38.1241	28.3573	15.2304	13.2448	146.428	169.54	259.543	160.196	193.626	222.513	3154.45	3484.84	3793.38	3480.67	3608.7	3432.75	14.344	14.2861	1.39196	12.9751	9.87138	7.84535	VIT_08s0105g00190	--	--	Cellular Component: ubiquitin ligase complex (GO:0000151);; Biological Process: MAPK cascade (GO:0000165);; Biological Process: respiratory burst involved in defense response (GO:0002679);; Molecular Function: ubiquitin-protein transferase activity (GO:0004842);; Molecular Function: protein binding (GO:0005515);; Cellular Component: cytosol (GO:0005829);; Biological Process: protein targeting to …	--	--	--	--	U-box domain;; Zinc-finger of the MIZ type in Nse subunit	E3 ubiquitin-protein ligase PUB23 GN=PUB23 OS=Arabidopsis thaliana (Mouse-ear cress) PE=1 SV=1	O	Posttranslational modification, protein turnover, chaperones	PREDICTED: E3 ubiquitin-protein ligase PUB23-like [Vitis vinifera]	RING-type E3 ubiquitin transferase
XP_002268382.1	LOC100250123	86.0074	82.8002	93.3383	90.5605	65.6809	78.6411	62.3098	53.4791	72.4558	62.0579	56.9489	41.3764	1215.04	1101.64	1068.73	1059.78	1154.82	1013.56	3417.46	3592.96	3752.72	3190.87	2981.16	3077.12	VIT_08s0056g01140	--	--	Molecular Function: catalytic activity (GO:0003824);; Cellular Component: Golgi apparatus (GO:0005794);; Biological Process: metabolic process (GO:0008152);; Biological Process: megagametogenesis (GO:0009561);; Cellular Component: membrane (GO:0016020);; Molecular Function: transferase activity (GO:0016740);; Biological Process: cell wall biogenesis (GO:0042546);; Cellular Component: intracellula…	--	--	[GMW]	Carbohydrate transport and metabolism;; Cell wall/membrane/envelope biogenesis;; Extracellular structures	Exostosin family	Xylogalacturonan beta-1,3-xylosyltransferase GN=XGD1 OS=Arabidopsis thaliana (Mouse-ear cress) PE=1 SV=2	GMW	Carbohydrate transport and metabolism;; Cell wall/membrane/envelope biogenesis;; Extracellular structures	PREDICTED: xylogalacturonan beta-1,3-xylosyltransferase [Vitis vinifera]	arabinosyltransferase ARAD1
XP_002268452.1	LOC100267301	698.112	594.487	654.683	592.76	540.678	559.593	1.0385	1.13785	0	1.44321	6.83386	5.51686	2812.77	2094.64	2360.77	1407.93	1691.6	1547.84	540.291	637.518	597.151	592.861	552.038	549.175	VIT_08s0056g01160	[R]	General function prediction only	Cellular Component: cytoplasm (GO:0005737);; Molecular Function: hydrolase activity (GO:0016787);;	--	--	[R]	General function prediction only	Alpha/beta hydrolase family;; alpha/beta hydrolase fold;; Alpha/beta hydrolase family;; Serine hydrolase;; Uncharacterised conserved protein (DUF2305)	--	R	General function prediction only	PREDICTED: uncharacterized protein LOC100267301 [Vitis vinifera]	cell wall organization
XP_002268704.1	LOC100256389	31.2754	25.1192	28.9217	78.6687	115.18	85.2635	313.626	427.833	323.347	305.238	425.977	385.261	1749.44	1667.07	1519.35	2408.12	2448.4	2406.62	13856.3	13978.1	13852.8	14494.1	14731.9	14509.5	VIT_08s0032g00700	[I]	Lipid transport and metabolism	Molecular Function: carboxylic ester hydrolase activity (GO:0004091);; Molecular Function: binding (GO:0005488);; Cellular Component: nucleus (GO:0005634);; Cellular Component: cytoplasm (GO:0005737);; Biological Process: amino acid transport (GO:0006865);; Biological Process: defense response (GO:0006952);; Biological Process: metabolic process (GO:0008152);; Biological Process: cell death (GO:0…	--	--	[V]	Defense mechanisms	alpha/beta hydrolase fold;; Alpha/beta hydrolase family;; Alpha/beta hydrolase family;; Carboxylesterase family;; Protein of unknown function (DUF2424)	Probable carboxylesterase 15 GN=CXE15 OS=Arabidopsis thaliana (Mouse-ear cress) PE=2 SV=1	V	Defense mechanisms	unnamed protein product [Vitis vinifera]	carboxylesterase 15
XP_002269188.1	LOC100246087	877.946	921.966	847.932	945.854	944.283	959.421	1015.65	941.004	984.101	923.653	875.873	948.899	1.36675	2.33647	0	2.55368	0	11.7856	32154.5	31173.2	33049.3	34168.3	34581	35416.5	VIT_08s0032g00760	--	--	Cellular Component: nucleus (GO:0005634);; Cellular Component: cytoplasm (GO:0005737);; Biological Process: defense response (GO:0006952);; Biological Process: cell communication (GO:0007154);; Biological Process: response to organic substance (GO:0010033);; Biological Process: cellular metabolic process (GO:0044237);; Biological Process: regulation of cellular process (GO:0050794);; Biological P…	--	--	--	--	Tubby C 2	Protein LURP-one-related 8 GN=At2g38640 OS=Arabidopsis thaliana (Mouse-ear cress) PE=2 SV=1	S	Function unknown	PREDICTED: protein LURP-one-related 8 [Vitis vinifera]	LURP-one-related
XP_002269517.1	LOC100261426	5174.97	5291.77	5209.85	3905.08	3947.52	3926.26	2372.97	2458.9	2464.58	1575.98	2346.29	2348.34	999.093	912.391	789.581	921.027	910.162	869.778	2039.24	2192.92	2099.08	2842.54	2628.83	2866.17	VIT_17s0053g00990	--	--	Molecular Function: structural constituent of cell wall (GO:0005199);; Cellular Component: extracellular region (GO:0005576);; Cellular Component: cytosol (GO:0005829);; Biological Process: syncytium formation (GO:0006949);; Cellular Component: plant-type cell wall (GO:0009505);; Cellular Component: plasmodesma (GO:0009506);; Cellular Component: chloroplast (GO:0009507);; Biological Process: plan…	--	--	--	--	Pollen allergen;; Rare lipoprotein A (RlpA)-like double-psi beta-barrel	Expansin-A15 (Precursor) GN=T17M13.26 OS=Arabidopsis thaliana (Mouse-ear cress) PE=2 SV=2	R	General function prediction only	PREDICTED: expansin-A15 [Vitis vinifera]	Belongs to the expansin family
XP_002269659.1	LOC100246152	41.3282	43.7259	57.8434	24.6983	33.3164	25.6618	3694.97	3588.79	3360	3534.41	3446.54	3179.55	5169.04	6920.62	6445.26	6871.95	6951.74	7069.79	40.6413	36.6082	58.4623	25.9501	28.8548	18.3058	VIT_11s0052g01070	--	--	Cellular Component: Golgi apparatus (GO:0005794);; Biological Process: protein glycosylation (GO:0006486);; Molecular Function: galactosyltransferase activity (GO:0008378);; Cellular Component: integral component of membrane (GO:0016021);;	--	--	[G]	Carbohydrate transport and metabolism	Galactosyltransferase	Probable beta-1,3-galactosyltransferase 16 GN=B3GALT16 OS=Arabidopsis thaliana (Mouse-ear cress) PE=2 SV=1	G	Carbohydrate transport and metabolism	PREDICTED: uncharacterized protein LOC100246152 [Vitis vinifera]	Belongs to the glycosyltransferase 31 family
XP_002269945.1	LOC100265063	30.1584	40.9349	34.1802	3.65901	17.1342	14.9004	611.675	465.382	580.728	448.837	501.15	512.148	251.482	185.749	197.395	189.824	223.661	211.355	600.057	598.231	606.894	662.726	603.673	612.809	VIT_11s0052g01110	[IQ]	Lipid transport and metabolism;; Secondary metabolites biosynthesis, transport and catabolism	Molecular Function: fatty-acyl-CoA synthase activity (GO:0004321);; Molecular Function: ATP binding (GO:0005524);; Cellular Component: nucleus (GO:0005634);; Cellular Component: peroxisome (GO:0005777);; Biological Process: polyamine catabolic process (GO:0006598);; Biological Process: protein targeting to membrane (GO:0006612);; Biological Process: response to wounding (GO:0009611);; Biological …	K01904|0|vvi:100265063|K01904 4-coumarate--CoA ligase [EC:6.2.1.12] | (RefSeq) 4-coumarate--CoA ligase 2	Ubiquinone and other terpenoid-quinone biosynthesis (ko00130);; Phenylalanine metabolism (ko00360);; Phenylpropanoid biosynthesis (ko00940)	[I]	Lipid transport and metabolism	AMP-binding enzyme;; AMP-binding enzyme C-terminal domain	4-coumarate--CoA ligase 2 GN=4CL2 OS=Solanum tuberosum (Potato) PE=3 SV=1	H	Coenzyme transport and metabolism	PREDICTED: 4-coumarate--CoA ligase 1 [Vitis vinifera]	4-coumarate-coa ligase
XP_002270299.1	LOC100241119	87.1244	78.1485	89.3944	56.7146	71.3923	54.6349	436.169	377.767	350.383	357.194	456.73	411.006	9.56724	1.16823	3.98779	32.3466	13.6935	17.2856	686.121	610.731	622.206	682.688	616.582	611.937	VIT_11s0052g01220	--	--	Molecular Function: hydrolase activity, hydrolyzing O-glycosyl compounds (GO:0004553);; Cellular Component: cell wall (GO:0005618);; Cellular Component: Golgi apparatus (GO:0005794);; Biological Process: cellular glucan metabolic process (GO:0006073);; Biological Process: response to heat (GO:0009408);; Biological Process: response to cold (GO:0009409);; Cellular Component: plant-type cell wall (…	--	--	--	--	Glycosyl hydrolases family 16;; Xyloglucan endo-transglycosylase (XET) C-terminus	Probable xyloglucan endotransglucosylase/hydrolase protein 23 (Precursor) GN=F14M19.90 OS=Arabidopsis thaliana (Mouse-ear cress) PE=2 SV=1	R	General function prediction only	PREDICTED: probable xyloglucan endotransglucosylase/hydrolase protein 23 [Vitis vinifera]	-
XP_002270321.1	LOC100252982	5198.42	5670.42	5630.53	5793.13	5639.04	5706.86	4417.77	4455.83	4573.37	3519.98	4242.69	4432.79	326.653	271.03	278.148	237.492	220.009	216.069	0	0.892882	0	0	2.27801	0	VIT_08s0032g00910	[M]	Cell wall/membrane/envelope biogenesis	Cellular Component: extracellular region (GO:0005576);; Cellular Component: vacuole (GO:0005773);; Biological Process: cell adhesion (GO:0007155);;	--	--	[MW]	Cell wall/membrane/envelope biogenesis;; Extracellular structures	Fasciclin domain	Fasciclin-like arabinogalactan protein 17 (Precursor) GN=FLA17 OS=Arabidopsis thaliana (Mouse-ear cress) PE=2 SV=1	MW	Cell wall/membrane/envelope biogenesis;; Extracellular structures	PREDICTED: fasciclin-like arabinogalactan protein 17 [Vitis vinifera]	fasciclin-like arabinogalactan protein
XP_002270416.1	LOC100252949	5.5849	3.72136	7.88774	4.57376	2.85569	2.4834	3409.39	3492.07	3495.18	3639.77	3273.42	3492.17	3262.43	2540.91	2736.62	3409.16	3506.45	3545.9	1153.5	1150.92	1191.52	833.398	935.503	899.6	VIT_11s0052g01320	--	--	Molecular Function: hydrolase activity, hydrolyzing O-glycosyl compounds (GO:0004553);; Cellular Component: cell wall (GO:0005618);; Cellular Component: Golgi apparatus (GO:0005794);; Biological Process: cellular glucan metabolic process (GO:0006073);; Biological Process: response to heat (GO:0009408);; Biological Process: response to cold (GO:0009409);; Cellular Component: plant-type cell wall (…	K08235|0|vvi:100252949|K08235 xyloglucan:xyloglucosyl transferase [EC:2.4.1.207] | (RefSeq) probable xyloglucan endotransglucosylase/hydrolase protein 23	--	--	--	Glycosyl hydrolases family 16;; Xyloglucan endo-transglycosylase (XET) C-terminus	Probable xyloglucan endotransglucosylase/hydrolase protein 23 (Precursor) GN=F14M19.90 OS=Arabidopsis thaliana (Mouse-ear cress) PE=2 SV=1	R	General function prediction only	PREDICTED: probable xyloglucan endotransglucosylase/hydrolase protein 23 [Vitis vinifera]	Catalyzes xyloglucan endohydrolysis (XEH) and or endotransglycosylation (XET). Cleaves and religates xyloglucan polymers, an essential constituent of the primary cell wall, and thereby participates in cell wall construction of growing tissues
XP_002270512.2	LOC100246655	503.758	492.149	617.873	418.957	416.931	418.867	7878.04	7449.52	7845.77	8401.63	9511.6	9591.06	550.8	574.771	653	583.09	661.853	585.352	1575.45	1582.19	1489.4	1112.86	1011.44	1040.82	VIT_08s0056g01480	[P]	Inorganic ion transport and metabolism	Molecular Function: manganese ion transmembrane transporter activity (GO:0005384);; Molecular Function: calcium:sodium antiporter activity (GO:0005432);; Cellular Component: vacuolar membrane (GO:0005774);; Biological Process: animal organ senescence (GO:0010260);; Cellular Component: endomembrane system (GO:0012505);; Molecular Function: potassium ion transmembrane transporter activity (GO:00150…	K13754|0|vvi:100246655|K13754 solute carrier family 24 (sodium/potassium/calcium exchanger), member 6 | (RefSeq) cation/calcium exchanger 1	--	[P]	Inorganic ion transport and metabolism	Sodium/calcium exchanger protein	Cation/calcium exchanger 1 OS=Arabidopsis thaliana (Mouse-ear cress) PE=2 SV=1	P	Inorganic ion transport and metabolism	PREDICTED: cation/calcium exchanger 3-like [Vitis vinifera]	Belongs to the Ca(2 ) cation antiporter (CaCA) (TC 2.A.19) family
XP_002271585.1	LOC100247834	218.928	259.565	302.363	379.622	393.134	417.212	241.97	291.29	256.299	271.323	198.182	238.144	97.0391	82.9446	87.7313	41.7101	48.3837	43.2139	2879.56	2765.26	2771.39	3784.73	3887.05	4135.37	VIT_11s0052g01730	[HI]	Coenzyme transport and metabolism;; Lipid transport and metabolism	Molecular Function: 1-deoxy-D-xylulose-5-phosphate synthase activity (GO:0008661);; Biological Process: thiamine biosynthetic process (GO:0009228);; Cellular Component: chloroplast stroma (GO:0009570);; Biological Process: chlorophyll biosynthetic process (GO:0015995);; Biological Process: terpenoid biosynthetic process (GO:0016114);; Molecular Function: metal ion binding (GO:0046872);; Biologica…	K01662|0|vvi:100247834|K01662 1-deoxy-D-xylulose-5-phosphate synthase [EC:2.2.1.7] | (RefSeq) probable 1-deoxy-D-xylulose-5-phosphate synthase 2, chloroplastic	Thiamine metabolism (ko00730);; Terpenoid backbone biosynthesis (ko00900)	[G]	Carbohydrate transport and metabolism	1-deoxy-D-xylulose-5-phosphate synthase;; Transketolase, pyrimidine binding domain;; Transketolase, C-terminal domain;; Dehydrogenase E1 component	Probable 1-deoxy-D-xylulose-5-phosphate synthase 2, chloroplastic (Precursor) OS=Oryza sativa subsp. japonica (Rice) PE=2 SV=1	H	Coenzyme transport and metabolism	PREDICTED: probable 1-deoxy-D-xylulose-5-phosphate synthase, chloroplastic [Vitis vinifera]	cla,cla1,def,dxps2,dxs
XP_002271614.1	LOC100259767	10.0528	13.0247	14.4609	0.914752	7.61518	0	2097.76	2101.61	2004.97	1817.72	1790.47	1876.65	496.13	454.443	425.696	385.606	371.551	458.853	285.685	320.545	268.648	265.49	294.623	242.334	VIT_15s0021g01630	--	--	Biological Process: respiratory burst involved in defense response (GO:0002679);; Molecular Function: DNA binding (GO:0003677);; Molecular Function: transcription factor activity, sequence-specific DNA binding (GO:0003700);; Molecular Function: protein binding (GO:0005515);; Cellular Component: nucleus (GO:0005634);; Biological Process: regulation of transcription, DNA-templated (GO:0006355);; Bi…	--	--	--	--	AP2 domain	Ethylene-responsive transcription factor 2 GN=MQL5.7 OS=Arabidopsis thaliana (Mouse-ear cress) PE=2 SV=1	K	Transcription	PREDICTED: ethylene-responsive transcription factor 2-like [Vitis vinifera]	ethylene-responsive transcription factor
XP_002272592.1	LOC100267393	60.3169	68.8451	27.6071	20.1246	23.7974	17.3838	2394.77	2235.88	2189.9	2099.87	2180	2132.27	1.36675	0	0	0	0.912901	0	888.133	903.597	778.105	823.418	837.549	822.89	VIT_11s0037g00890	[F]	Nucleotide transport and metabolism	Cellular Component: mitochondrion (GO:0005739);;	--	--	[F]	Nucleotide transport and metabolism	Glutamine amidotransferase class-I;; Peptidase C26	--	F	Nucleotide transport and metabolism	PREDICTED: putative glutamine amidotransferase YLR126C [Vitis vinifera]	glutamine amidotransferase YLR126C
XP_002272782.1	LOC100254698	4934.82	5048.02	5397.84	5401.61	5640.95	5526.4	450.708	398.248	486.643	618.414	415.727	433.073	5113.01	5026.91	5094.4	3920.75	4161	4173.68	71.72	77.6807	62.6382	125.758	95.6765	106.348	VIT_11s0052g01090	[IQ]	Lipid transport and metabolism;; Secondary metabolites biosynthesis, transport and catabolism	Molecular Function: fatty-acyl-CoA synthase activity (GO:0004321);; Molecular Function: ATP binding (GO:0005524);; Cellular Component: nucleus (GO:0005634);; Cellular Component: peroxisome (GO:0005777);; Biological Process: polyamine catabolic process (GO:0006598);; Biological Process: protein targeting to membrane (GO:0006612);; Biological Process: response to wounding (GO:0009611);; Biological …	K01904|0|vvi:100254698|K01904 4-coumarate--CoA ligase [EC:6.2.1.12] | (RefSeq) 4-coumarate--CoA ligase 2	Ubiquinone and other terpenoid-quinone biosynthesis (ko00130);; Phenylalanine metabolism (ko00360);; Phenylpropanoid biosynthesis (ko00940)	[I]	Lipid transport and metabolism	AMP-binding enzyme;; AMP-binding enzyme C-terminal domain	4-coumarate--CoA ligase 2 GN=4CL2 OS=Nicotiana tabacum (Common tobacco) PE=2 SV=1	H	Coenzyme transport and metabolism	PREDICTED: 4-coumarate--CoA ligase 1 isoform 1 [Vitis vinifera]	4-coumarate-coa ligase
XP_002273653.1	LOC100253104	8.93584	19.5371	35.4948	5.48851	0	3.3112	2145.54	2115.27	1881.69	2350.98	2443.11	2283.98	8.20049	10.5141	0.996946	5.95859	6.3903	19.6427	8382.87	8333.27	8197.25	7571.45	7844.71	8073.74	VIT_15s0021g02060	--	--	Biological Process: transition metal ion transport (GO:0000041);; Cellular Component: nucleus (GO:0005634);; Cellular Component: cytosol (GO:0005829);; Biological Process: cellular amino acid metabolic process (GO:0006520);; Biological Process: protein targeting to membrane (GO:0006612);; Biological Process: xenobiotic metabolic process (GO:0006805);; Biological Process: anion transport (GO:00068…	K08237|0|vvi:100253104|K08237 hydroquinone glucosyltransferase [EC:2.4.1.218] | (RefSeq) hydroquinone glucosyltransferase	--	[GC]	Carbohydrate transport and metabolism;; Energy production and conversion	UDP-glucoronosyl and UDP-glucosyl transferase	Hydroquinone glucosyltransferase GN=AS OS=Rauvolfia serpentina (Serpentwood) PE=1 SV=1	R	General function prediction only	PREDICTED: hydroquinone glucosyltransferase [Vitis vinifera]	Belongs to the UDP-glycosyltransferase family
XP_002273742.2	LOC100266747	55.849	45.5866	35.4948	10.0623	14.2785	17.3838	2433.2	2449.8	2554.34	2223.26	2511.44	2447.65	724.377	973.139	956.072	955.076	841.694	935.777	0	0	0	3.99233	2.27801	1.74341	VIT_11s0052g01200	--	--	Molecular Function: hydrolase activity, hydrolyzing O-glycosyl compounds (GO:0004553);; Cellular Component: cell wall (GO:0005618);; Cellular Component: Golgi apparatus (GO:0005794);; Biological Process: cellular glucan metabolic process (GO:0006073);; Biological Process: response to heat (GO:0009408);; Biological Process: response to cold (GO:0009409);; Cellular Component: plant-type cell wall (…	K14504|0|vvi:100266747|K14504 xyloglucan:xyloglucosyl transferase TCH4 [EC:2.4.1.207] | (RefSeq) probable xyloglucan endotransglucosylase/hydrolase protein 23	Plant hormone signal transduction (ko04075)	--	--	Glycosyl hydrolases family 16;; Xyloglucan endo-transglycosylase (XET) C-terminus	Probable xyloglucan endotransglucosylase/hydrolase protein 23 (Precursor) GN=F14M19.90 OS=Arabidopsis thaliana (Mouse-ear cress) PE=2 SV=1	R	General function prediction only	PREDICTED: probable xyloglucan endotransglucosylase/hydrolase protein 23-like [Vitis vinifera]	Catalyzes xyloglucan endohydrolysis (XEH) and or endotransglycosylation (XET). Cleaves and religates xyloglucan polymers, an essential constituent of the primary cell wall, and thereby participates in cell wall construction of growing tissues
XP_002274404.1	LOC100256457	8649.89	8665.18	8806.66	2167.96	2107.5	2163.87	2790.44	2836.67	2647.34	2809.92	2937.42	2847.62	2393.18	2046.75	2103.56	2530.7	2537.86	2390.91	1763.12	1630.4	1600.75	1690.75	1690.28	1834.94	VIT_11s0052g01250	--	--	Molecular Function: hydrolase activity, hydrolyzing O-glycosyl compounds (GO:0004553);; Cellular Component: cell wall (GO:0005618);; Cellular Component: Golgi apparatus (GO:0005794);; Biological Process: cellular glucan metabolic process (GO:0006073);; Biological Process: response to heat (GO:0009408);; Biological Process: response to cold (GO:0009409);; Cellular Component: plant-type cell wall (…	--	--	--	--	Glycosyl hydrolases family 16;; Xyloglucan endo-transglycosylase (XET) C-terminus	Brassinosteroid-regulated protein BRU1 (Precursor) OS=Glycine max (Soybean) PE=2 SV=1	G	Carbohydrate transport and metabolism	PREDICTED: probable xyloglucan endotransglucosylase/hydrolase protein 23 [Vitis vinifera]	Catalyzes xyloglucan endohydrolysis (XEH) and or endotransglycosylation (XET). Cleaves and religates xyloglucan polymers, an essential constituent of the primary cell wall, and thereby participates in cell wall construction of growing tissues
XP_002274552.1	LOC100251303	96.0602	76.2878	78.8774	51.2261	52.3544	58.7739	1689.64	1661.27	1644.85	1351.56	1373.61	1440.82	10645.6	11044.5	10708.2	10392.6	10450	10135.6	4353.4	4517.98	4599.03	5314.79	4941.77	4906.83	VIT_11s0052g01260	--	--	Molecular Function: hydrolase activity, hydrolyzing O-glycosyl compounds (GO:0004553);; Cellular Component: cell wall (GO:0005618);; Cellular Component: Golgi apparatus (GO:0005794);; Biological Process: cellular glucan metabolic process (GO:0006073);; Biological Process: response to heat (GO:0009408);; Biological Process: response to cold (GO:0009409);; Cellular Component: plant-type cell wall (…	K08235|0|vvi:100251303|K08235 xyloglucan:xyloglucosyl transferase [EC:2.4.1.207] | (RefSeq) probable xyloglucan endotransglucosylase/hydrolase protein 23	--	--	--	Glycosyl hydrolases family 16;; Xyloglucan endo-transglycosylase (XET) C-terminus	Probable xyloglucan endotransglucosylase/hydrolase protein 23 (Precursor) GN=F14M19.90 OS=Arabidopsis thaliana (Mouse-ear cress) PE=2 SV=1	R	General function prediction only	PREDICTED: probable xyloglucan endotransglucosylase/hydrolase protein 23 [Vitis vinifera]	Catalyzes xyloglucan endohydrolysis (XEH) and or endotransglycosylation (XET). Cleaves and religates xyloglucan polymers, an essential constituent of the primary cell wall, and thereby participates in cell wall construction of growing tissues
XP_002274601.1	LOC100246166	35.7433	50.2383	44.6972	12.8065	13.3266	22.3506	8024.47	10966.6	11064.1	12747.1	13076.6	11972.5	6043.76	6491.87	5938.81	6736.61	7232	7272.5	3.586	3.57153	1.39196	14.9712	9.87138	3.48682	VIT_11s0052g01270	--	--	Molecular Function: hydrolase activity, hydrolyzing O-glycosyl compounds (GO:0004553);; Cellular Component: cell wall (GO:0005618);; Cellular Component: Golgi apparatus (GO:0005794);; Biological Process: cellular glucan metabolic process (GO:0006073);; Biological Process: response to heat (GO:0009408);; Biological Process: response to cold (GO:0009409);; Cellular Component: plant-type cell wall (…	K08235|0|vvi:100246166|K08235 xyloglucan:xyloglucosyl transferase [EC:2.4.1.207] | (RefSeq) probable xyloglucan endotransglucosylase/hydrolase protein 23	--	--	--	Glycosyl hydrolases family 16;; Xyloglucan endo-transglycosylase (XET) C-terminus	Probable xyloglucan endotransglucosylase/hydrolase protein 23 (Precursor) GN=F14M19.90 OS=Arabidopsis thaliana (Mouse-ear cress) PE=2 SV=1	R	General function prediction only	PREDICTED: probable xyloglucan endotransglucosylase/hydrolase protein 23 [Vitis vinifera]	Catalyzes xyloglucan endohydrolysis (XEH) and or endotransglycosylation (XET). Cleaves and religates xyloglucan polymers, an essential constituent of the primary cell wall, and thereby participates in cell wall construction of growing tissues
XP_002274827.1	LOC100263324	78.1886	73.4968	70.9897	23.7836	30.4607	34.7676	2797.71	2899.25	2871.2	3141.86	3088.91	3278.85	779.047	713.791	720.792	347.3	363.334	326.068	118.338	89.2882	97.4372	54.8945	94.1578	95.8876	VIT_11s0052g01300	--	--	Molecular Function: hydrolase activity, hydrolyzing O-glycosyl compounds (GO:0004553);; Cellular Component: cell wall (GO:0005618);; Cellular Component: Golgi apparatus (GO:0005794);; Biological Process: cellular glucan metabolic process (GO:0006073);; Biological Process: response to heat (GO:0009408);; Biological Process: response to cold (GO:0009409);; Cellular Component: plant-type cell wall (…	K08235|0|vvi:100263324|K08235 xyloglucan:xyloglucosyl transferase [EC:2.4.1.207] | (RefSeq) probable xyloglucan endotransglucosylase/hydrolase protein 23-like	--	--	--	Glycosyl hydrolases family 16;; Xyloglucan endo-transglycosylase (XET) C-terminus	Probable xyloglucan endotransglucosylase/hydrolase protein 23 (Precursor) GN=F14M19.90 OS=Arabidopsis thaliana (Mouse-ear cress) PE=2 SV=1	R	General function prediction only	PREDICTED: probable xyloglucan endotransglucosylase/hydrolase protein 23 [Vitis vinifera]	Catalyzes xyloglucan endohydrolysis (XEH) and or endotransglycosylation (XET). Cleaves and religates xyloglucan polymers, an essential constituent of the primary cell wall, and thereby participates in cell wall construction of growing tissues
XP_002274858.1	LOC100241056	12.2868	23.2585	21.034	6.40327	4.75949	7.45021	0	0	0	0	0	0.919476	2152.63	2086.47	2093.59	2065.08	2046.72	2211.77	1256.3	1259.86	1318.19	908.255	922.595	980.669	VIT_11s0052g01280	--	--	Molecular Function: hydrolase activity, hydrolyzing O-glycosyl compounds (GO:0004553);; Cellular Component: cell wall (GO:0005618);; Cellular Component: Golgi apparatus (GO:0005794);; Biological Process: cellular glucan metabolic process (GO:0006073);; Biological Process: response to heat (GO:0009408);; Biological Process: response to cold (GO:0009409);; Cellular Component: plant-type cell wall (…	K14504|0|vvi:100241056|K14504 xyloglucan:xyloglucosyl transferase TCH4 [EC:2.4.1.207] | (RefSeq) xyloglucan endotransglucosylase/hydrolase protein 22	Plant hormone signal transduction (ko04075)	--	--	Glycosyl hydrolases family 16;; Xyloglucan endo-transglycosylase (XET) C-terminus	Probable xyloglucan endotransglucosylase/hydrolase protein 23 (Precursor) GN=F14M19.90 OS=Arabidopsis thaliana (Mouse-ear cress) PE=2 SV=1	R	General function prediction only	PREDICTED: probable xyloglucan endotransglucosylase/hydrolase protein 23 [Vitis vinifera]	Catalyzes xyloglucan endohydrolysis (XEH) and or endotransglycosylation (XET). Cleaves and religates xyloglucan polymers, an essential constituent of the primary cell wall, and thereby participates in cell wall construction of growing tissues
XP_002275585.1	LOC100254818	68.1357	69.7754	46.0118	49.3966	59.0177	57.9461	2412.43	2430.45	2198.55	1612.78	1790.47	1816.88	0	0	3.98779	0	0	3.14283	460.203	514.3	586.015	479.079	408.523	393.139	VIT_15s0021g02680	--	--	Biological Process: regulation of cyclin-dependent protein serine/threonine kinase activity (GO:0000079);; Molecular Function: cyclin-dependent protein serine/threonine kinase activity (GO:0004693);; Molecular Function: protein binding (GO:0005515);; Cellular Component: nucleus (GO:0005634);; Cellular Component: cytoplasm (GO:0005737);; Biological Process: trichoblast differentiation (GO:0010054)…	--	--	[R]	General function prediction only	Cyclin;; Cyclin, N-terminal domain	Cyclin-U2-1 GN=CYCU2-1 OS=Arabidopsis thaliana (Mouse-ear cress) PE=1 SV=1	R	General function prediction only	PREDICTED: cyclin-U2-1 [Vitis vinifera]	regulation of cyclin-dependent protein serine/threonine kinase activity
XP_002276463.1	LOC100242781	2131.2	2169.55	2237.49	1682.23	1655.35	1768.18	89.3108	92.1661	82.1887	48.3474	85.4233	75.397	1718	2072.45	1845.35	1788.43	1975.52	1862.91	934.751	871.453	1027.27	1567.99	1706.99	1442.67	VIT_11s0052g01560	[V]	Defense mechanisms	Cellular Component: plasma membrane (GO:0005886);; Biological Process: drug transmembrane transport (GO:0006855);; Cellular Component: plant-type vacuole membrane (GO:0009705);; Biological Process: proanthocyanidin biosynthetic process (GO:0010023);; Biological Process: maintenance of seed dormancy (GO:0010231);; Molecular Function: drug transmembrane transporter activity (GO:0015238);; Molecular…	K03327|0|vvi:100242781|K03327 multidrug resistance protein, MATE family | (RefSeq) protein DETOXIFICATION 16	--	[R]	General function prediction only	MatE	MATE efflux family protein 9 GN=F3L12.7 OS=Arabidopsis thaliana (Mouse-ear cress) PE=2 SV=1	S	Function unknown	unnamed protein product [Vitis vinifera]	Belongs to the multi antimicrobial extrusion (MATE) (TC 2.A.66.1) family
XP_002276867.1	LOC100256515	6973.3	6856.6	6784.77	12213.8	12230	11979.9	1068.61	1073	1064.13	751.189	984.076	948.899	13.6675	24.5329	6.97862	18.727	17.3451	21.9998	247.434	229.471	246.377	196.622	206.54	229.259	VIT_11s0052g01650	[S]	Function unknown	Cellular Component: extracellular region (GO:0005576);; Cellular Component: cell wall (GO:0005618);; Biological Process: signal transduction (GO:0007165);; Biological Process: response to water deprivation (GO:0009414);; Biological Process: systemic acquired resistance (GO:0009627);; Biological Process: response to vitamin B1 (GO:0010266);; Cellular Component: cytoplasmic vesicle (GO:0016023);; B…	--	--	[S]	Function unknown	Cysteine-rich secretory protein family	Pathogenesis-related protein PR-1 (Precursor) GN=PR-1 OS=Medicago truncatula (Barrel medic) PE=2 SV=1	S	Function unknown	PREDICTED: pathogenesis-related protein PR-1 [Vitis vinifera]	Belongs to the CRISP family
XP_002278071.1	LOC100263125	17.8717	23.2585	19.7194	6.40327	8.56708	8.27801	1136.12	1128.75	1167.94	1093.23	939.656	1035.33	7465.18	7031.6	7398.34	582.239	639.943	668.637	175.714	124.111	175.387	222.572	166.295	171.726	VIT_05s0020g03240	[RTKL]	General function prediction only;; Signal transduction mechanisms;; Transcription;; Replication, recombination and repair	Molecular Function: protein serine/threonine kinase activity (GO:0004674);; Molecular Function: binding (GO:0005488);; Molecular Function: ATP binding (GO:0005524);; Biological Process: cellular protein modification process (GO:0006464);; Biological Process: protein phosphorylation (GO:0006468);; Cellular Component: membrane (GO:0016020);; Molecular Function: kinase activity (GO:0016301);; Biolog…	--	--	--	--	Protein tyrosine kinase;; Protein kinase domain;; D-mannose binding lectin;; S-locus glycoprotein family	G-type lectin S-receptor-like serine/threonine-protein kinase RLK1 (Precursor) GN=RLK1 OS=Arabidopsis thaliana (Mouse-ear cress) PE=2 SV=2	T	Signal transduction mechanisms	PREDICTED: G-type lectin S-receptor-like serine/threonine-protein kinase RLK1 [Vitis vinifera]	G-type lectin S-receptor-like serine threonine-protein kinase
XP_002278244.1	LOC100244323	25.6905	21.3978	26.2925	11.8918	12.3747	4.96681	966.841	796.497	871.632	798.815	781.338	683.171	0	11.6823	2.99084	0.851227	5.4774	3.92854	78.892	132.147	77.9497	125.758	155.664	185.673	VIT_05s0020g03280	[Q]	Secondary metabolites biosynthesis, transport and catabolism	Molecular Function: copper ion binding (GO:0005507);; Biological Process: nitric oxide biosynthetic process (GO:0006809);; Molecular Function: primary amine oxidase activity (GO:0008131);; Biological Process: amine metabolic process (GO:0009308);; Biological Process: abscisic acid-activated signaling pathway (GO:0009738);; Molecular Function: metal ion binding (GO:0046872);; Molecular Function: q…	K00276|0|vvi:100244323|K00276 primary-amine oxidase [EC:1.4.3.21] | (RefSeq) primary amine oxidase	Glycine, serine and threonine metabolism (ko00260);; Tyrosine metabolism (ko00350);; Phenylalanine metabolism (ko00360);; beta-Alanine metabolism (ko00410);; Isoquinoline alkaloid biosynthesis (ko00950);; Tropane, piperidine and pyridine alkaloid biosynthesis (ko00960)	[Q]	Secondary metabolites biosynthesis, transport and catabolism	Copper amine oxidase, enzyme domain;; Copper amine oxidase, N3 domain;; Copper amine oxidase, N2 domain	Primary amine oxidase (Precursor; Fragment) OS=Lens culinaris (Lentil) PE=1 SV=3	Q	Secondary metabolites biosynthesis, transport and catabolism	PREDICTED: primary amine oxidase [Vitis vinifera]	amine oxidase
XP_002278559.1	LOC100253046	655.667	688.451	663.885	2069.17	2010.41	2095.16	1215.04	1187.92	1217.69	1511.04	1504.59	1538.28	198.178	144.861	173.469	110.659	121.416	107.642	2.39067	0	5.56784	0	1.51867	1.74341	VIT_15s0021g02700	--	--	Cellular Component: extracellular region (GO:0005576);; Biological Process: unidimensional cell growth (GO:0009826);; Biological Process: plant-type cell wall loosening (GO:0009828);; Biological Process: plant-type cell wall modification involved in multidimensional cell growth (GO:0009831);; Cellular Component: cytoplasmic vesicle (GO:0016023);; Biological Process: sexual reproduction (GO:001995…	--	--	--	--	Pollen allergen;; Rare lipoprotein A (RlpA)-like double-psi beta-barrel	Putative expansin-B2 (Precursor) OS=Arabidopsis thaliana (Mouse-ear cress) PE=3 SV=2	R	General function prediction only	PREDICTED: putative expansin-B2 [Vitis vinifera]	Belongs to the expansin family
XP_002278578.1	LOC100261343	20.1056	26.0495	27.6071	12.8065	21.8936	12.417	41572.1	39377.7	39261.3	40697.7	45843.8	44677.3	159.91	287.385	322.014	261.327	252.873	251.426	13142.7	12478	12421.8	15311.6	15469.2	15021.2	VIT_05s0020g03520	--	--	--	--	--	--	--	Transcriptional repressor, ovate	--	S	Function unknown	PREDICTED: uncharacterized protein LOC100261343 [Vitis vinifera]	transcription repressor
XP_002278672.1	LOC100241613	91.5923	65.1237	77.5628	95.1342	85.6708	81.9523	2560.93	2588.62	2487.29	2809.2	2453.36	2364.89	6028.73	5751.21	5823.16	3369.15	3264.53	3340.83	455.422	329.473	382.789	1134.82	1071.42	1110.55	VIT_17s0000g08760	[S]	Function unknown	Molecular Function: nucleotide binding (GO:0000166);; Biological Process: polysaccharide biosynthetic process (GO:0000271);; Molecular Function: protein serine/threonine kinase activity (GO:0004674);; Molecular Function: protein binding (GO:0005515);; Biological Process: cellular protein modification process (GO:0006464);; Biological Process: ion transport (GO:0006811);; Biological Process: immun…	--	--	--	--	Leucine Rich repeats (2 copies);; Leucine rich repeat;; Leucine Rich Repeat;; Leucine Rich repeat;; Leucine rich repeat;; Leucine rich repeat N-terminal domain	LRR receptor-like serine/threonine-protein kinase GSO1 (Precursor) GN=GSO1 OS=Arabidopsis thaliana (Mouse-ear cress) PE=2 SV=1	R	General function prediction only	PREDICTED: LRR receptor-like serine/threonine-protein kinase GSO1 [Vitis vinifera]	LRR receptor-like serine threonine-protein kinase
XP_002278864.1	LOC100261442	17.8717	29.7709	28.9217	14.636	15.2304	19.8672	360.359	370.94	419.595	233.8	189.07	203.204	24643.8	24610	23585.8	5966.25	5536.74	5767.88	5400.52	5325.15	5507.98	4616.13	4429.21	4843.2	VIT_05s0020g03680	[J]	Translation, ribosomal structure and biogenesis	Cellular Component: cytoplasm (GO:0005737);; Molecular Function: N-acetyltransferase activity (GO:0008080);; Biological Process: metabolic process (GO:0008152);; Cellular Component: membrane (GO:0016020);;	--	--	--	--	Acetyltransferase (GNAT) domain;; Acetyltransferase (GNAT) domain;; Acetyltransferase (GNAT) domain;; Acetyltransferase (GNAT) family	--	R	General function prediction only	PREDICTED: uncharacterized N-acetyltransferase p20 [Vitis vinifera]	N-acetyltransferase
XP_002278974.1	LOC100257872	631.093	658.68	688.863	826.021	864.323	896.508	534.826	471.071	471.503	481.31	422.561	422.959	7045.59	7074.82	7290.67	4039.07	4169.22	4006.32	701.661	816.987	748.874	787.487	812.491	794.996	VIT_05s0020g03750	--	--	Biological Process: cellular process (GO:0009987);; Cellular Component: membrane (GO:0016020);; Biological Process: primary metabolic process (GO:0044238);; Cellular Component: cell part (GO:0044464);; Biological Process: single-organism process (GO:0044699);; Biological Process: organic substance metabolic process (GO:0071704);;	--	--	--	--	Probable lipid transfer;; Protease inhibitor/seed storage/LTP family	Non-specific lipid-transfer protein-like protein At5g64080 (Precursor) GN=At5g64080 OS=Arabidopsis thaliana (Mouse-ear cress) PE=1 SV=1	R	General function prediction only	PREDICTED: uncharacterized protein LOC100257872 [Vitis vinifera]	Non-specific lipid-transfer protein-like protein
XP_002279622.1	LOC100265549	174.249	198.162	189.306	133.554	140.881	137.415	5.19249	2.27571	10.8143	8.65924	2.27795	11.0337	1420.05	1218.47	1446.57	1232.58	1299.06	1287.77	1494.17	1425.04	1462.95	1359.39	1279.48	1181.16	VIT_17s0000g08290	--	--	Molecular Function: DNA binding (GO:0003677);; Molecular Function: transcription factor activity, sequence-specific DNA binding (GO:0003700);; Cellular Component: nucleus (GO:0005634);; Molecular Function: zinc ion binding (GO:0008270);; Biological Process: guard cell differentiation (GO:0010052);; Biological Process: procambium histogenesis (GO:0010067);; Biological Process: phloem or xylem hist…	--	--	--	--	Dof domain, zinc finger	Dof zinc finger protein DOF5.6 GN=DOF5.6 OS=Arabidopsis thaliana (Mouse-ear cress) PE=2 SV=2	R	General function prediction only	PREDICTED: dof zinc finger protein DOF5.6 [Vitis vinifera]	dof zinc finger protein
XP_002280760.1	LOC100262551	21494	21789.5	21708.4	20501.4	20739	20471.5	3682.51	3576.27	3623.87	3468.03	3694.84	4140.4	1332.58	1230.15	1636.99	2366.41	2219.26	2300.55	3619.47	3833.14	3712.36	4022.27	4032.84	4163.27	VIT_15s0048g00370	[G]	Carbohydrate transport and metabolism	Molecular Function: transketolase activity (GO:0004802);; Cellular Component: cytosol (GO:0005829);; Biological Process: gluconeogenesis (GO:0006094);; Biological Process: glycolytic process (GO:0006096);; Biological Process: calcium ion transport (GO:0006816);; Biological Process: water transport (GO:0006833);; Biological Process: hyperosmotic response (GO:0006972);; Biological Process: Golgi or…	K00615|0|vvi:100262551|K00615 transketolase [EC:2.2.1.1] | (RefSeq) transketolase, chloroplastic	Pentose phosphate pathway (ko00030);; Carbon fixation in photosynthetic organisms (ko00710);; Carbon metabolism (ko01200);; Biosynthesis of amino acids (ko01230)	[G]	Carbohydrate transport and metabolism	Transketolase, thiamine diphosphate binding domain;; Transketolase, pyrimidine binding domain;; Transketolase, C-terminal domain;; 1-deoxy-D-xylulose-5-phosphate synthase	Transketolase, chloroplastic (Precursor) OS=Solanum tuberosum (Potato) PE=2 SV=1	G	Carbohydrate transport and metabolism	PREDICTED: transketolase, chloroplastic-like [Vitis vinifera]	Transketolase
XP_002281432.1	LOC100244275	195.471	150.715	147.238	89.6457	87.5746	108.442	483.94	614.441	576.402	783.662	713	815.575	758.545	911.222	979.001	978.911	859.952	936.563	53.79	83.9309	45.9347	38.9252	72.137	50.5589	VIT_05s0020g03030	--	--	Cellular Component: plasma membrane (GO:0005886);; Biological Process: defense response (GO:0006952);; Biological Process: immune response (GO:0006955);; Biological Process: cell communication (GO:0007154);; Biological Process: signal transduction (GO:0007165);; Molecular Function: kinase activity (GO:0016301);; Biological Process: phosphorylation (GO:0016310);; Biological Process: primary metabo…	--	--	[R]	General function prediction only	Carbohydrate-binding protein of the ER;; Leucine Rich repeats (2 copies);; Di-glucose binding within endoplasmic reticulum;; Leucine Rich Repeat;; Leucine rich repeat N-terminal domain	Putative leucine-rich repeat receptor-like serine/threonine-protein kinase At2g14440 (Precursor) GN=At2g14440 OS=Arabidopsis thaliana (Mouse-ear cress) PE=3 SV=1	R	General function prediction only	PREDICTED: probable LRR receptor-like serine/threonine-protein kinase At1g67720 [Vitis vinifera]	receptor-like serine threonine-protein kinase
XP_002281747.1	LOC100241512	690.293	650.307	748.021	671.428	733.913	680.452	799.643	659.955	775.385	990.762	987.493	1000.39	2909.81	2960.3	3455.42	4672.38	4756.21	4758.24	1381.81	1450.93	1379.43	1113.86	1063.83	1093.99	VIT_17s0000g08860	--	--	--	K18726|0|vvi:100241512|K18726 FAS-associated factor 2 | (RefSeq) plant UBX domain-containing protein 10	--	[T]	Signal transduction mechanisms	UBX domain	--	O	Posttranslational modification, protein turnover, chaperones	PREDICTED: FAS-associated factor 2-B [Vitis vinifera]	FAS-associated factor
XP_002282076.1	LOC100243290	296	283.753	278.7	401.576	368.384	391.55	70.6178	86.4768	48.6643	93.8085	53.5319	45.9738	1366.75	1315.43	1283.07	1418.14	1434.17	1441.77	490.087	474.12	483.01	779.502	920.317	888.268	VIT_17s0000g08710	--	--	Biological Process: cell fate specification (GO:0001708);; Molecular Function: DNA binding (GO:0003677);; Molecular Function: transcription factor activity, sequence-specific DNA binding (GO:0003700);; Molecular Function: protein binding (GO:0005515);; Cellular Component: nucleus (GO:0005634);; Biological Process: regulation of transcription, DNA-templated (GO:0006355);; Biological Process: fatty…	--	--	[K]	Transcription	KNOX2 domain;; KNOX1 domain;; Homeobox KN domain;; ELK domain;; Homeobox domain	Homeobox protein knotted-1-like 6 GN=KNAT6 OS=Arabidopsis thaliana (Mouse-ear cress) PE=1 SV=1	K	Transcription	PREDICTED: homeobox protein knotted-1-like 6 [Vitis vinifera]	Homeobox protein knotted-1-like
XP_002282143.1	LOC100252916	604.286	597.278	592.895	633.009	635.868	712.737	2.07699	2.27571	1.08143	5.05123	1.13898	0	0	0	0	0.851227	1.8258	2.35712	49.0087	56.2516	50.1105	60.883	63.025	56.6609	VIT_05s0020g03330	[O]	Posttranslational modification, protein turnover, chaperones	Molecular Function: protease binding (GO:0002020);; Molecular Function: KDEL sequence binding (GO:0005046);; Molecular Function: ATP binding (GO:0005524);; Cellular Component: cell wall (GO:0005618);; Cellular Component: cytoplasm (GO:0005737);; Cellular Component: mitochondrion (GO:0005739);; Cellular Component: vacuolar membrane (GO:0005774);; Cellular Component: endoplasmic reticulum (GO:00057…	K09489|0|vvi:100252916|K09489 heat shock 70kDa protein 4 | (RefSeq) heat shock 70 kDa protein 8	--	[O]	Posttranslational modification, protein turnover, chaperones	Hsp70 protein	Heat shock 70 kDa protein 8 GN=F22D22.13 OS=Arabidopsis thaliana (Mouse-ear cress) PE=2 SV=1	O	Posttranslational modification, protein turnover, chaperones	PREDICTED: heat shock cognate 70 kDa protein 4 [Vitis vinifera]	Belongs to the heat shock protein 70 family
XP_002282800.2	LOC100265712	98.2942	71.6361	80.192	71.3507	65.6809	86.0913	780.95	835.184	923.541	838.503	734.64	835.804	5.46699	0	0	0	0	0	1048.31	1057.17	995.251	1150.79	1212.66	1066.97	VIT_17s0000g08370	--	--	Biological Process: response to reactive oxygen species (GO:0000302);; Molecular Function: NAD+ ADP-ribosyltransferase activity (GO:0003950);; Cellular Component: mitochondrion (GO:0005739);; Biological Process: toxin catabolic process (GO:0009407);; Biological Process: response to salt stress (GO:0009651);; Biological Process: hormone-mediated signaling pathway (GO:0009755);; Biological Process:…	--	--	--	--	RCD1-SRO-TAF4 (RST) plant domain	Probable inactive poly [ADP-ribose] polymerase SRO5 GN=SRO5 OS=Arabidopsis thaliana (Mouse-ear cress) PE=1 SV=1	S	Function unknown	unnamed protein product [Vitis vinifera]	inactive poly ADP-ribose polymerase
XP_002283073.1	LOC100259653	192.12	242.819	212.969	225.029	220.84	233.44	948.148	952.383	934.355	1181.99	1812.11	1850.91	2173.13	2087.63	2017.82	2665.19	2576.21	2508.76	2407.4	2437.57	2455.42	1457.2	1520.95	1603.94	VIT_05s0020g03870	[RTKL]	General function prediction only;; Signal transduction mechanisms;; Transcription;; Replication, recombination and repair	Biological Process: regulation of response to biotic stimulus (GO:0002831);; Molecular Function: protein serine/threonine kinase activity (GO:0004674);; Molecular Function: non-membrane spanning protein tyrosine kinase activity (GO:0004715);; Molecular Function: signal transducer activity (GO:0004871);; Molecular Function: binding (GO:0005488);; Molecular Function: ATP binding (GO:0005524);; Cell…	--	--	[T]	Signal transduction mechanisms	Protein tyrosine kinase;; Protein kinase domain	Serine/threonine-protein kinase HT1 GN=HT1 OS=Arabidopsis thaliana (Mouse-ear cress) PE=1 SV=1	T	Signal transduction mechanisms	PREDICTED: serine/threonine-protein kinase HT1-like [Vitis vinifera]	serine threonine-protein kinase
XP_002283471.1	LOC100252909	485.886	466.1	443.028	601.907	650.146	580.288	1453.9	1561.13	1568.07	1936.78	1863.37	1945.61	2695.23	2519.88	2719.67	1630.1	1768.29	1653.91	1459.5	1365.22	1433.72	1259.58	1332.64	1236.95	VIT_05s0020g04130	[C]	Energy production and conversion	Molecular Function: DNA binding (GO:0003677);; Molecular Function: transcription factor activity, sequence-specific DNA binding (GO:0003700);; Molecular Function: aldo-keto reductase (NADP) activity (GO:0004033);; Cellular Component: nucleus (GO:0005634);; Cellular Component: cytosol (GO:0005829);; Cellular Component: plasma membrane (GO:0005886);; Biological Process: gluconeogenesis (GO:0006094)…	--	--	[C]	Energy production and conversion	Aldo/keto reductase family	Perakine reductase GN=PR OS=Rauvolfia serpentina (Serpentwood) PE=1 SV=1	C	Energy production and conversion	PREDICTED: auxin-induced protein PCNT115 [Vitis vinifera]	aldo-keto reductase
XP_003631984.1	LOC100854649	1248.78	1322.94	1252.84	668.684	669.184	693.697	281.433	194.573	194.657	57.7283	148.067	160.908	31.4352	26.8694	41.8717	64.6932	77.5965	49.4995	147.026	175.898	129.452	160.691	138.199	150.805	VIT_05s0020g02830	--	--	--	--	--	--	--	--	--	S	Function unknown	PREDICTED: uncharacterized protein LOC100854649 [Vitis vinifera]	-
XP_003633168.1	LOC100244999	165.313	149.785	172.216	252.472	248.445	216.056	1622.13	1564.55	1570.24	1195.7	1146.95	1227.5	507.064	455.611	463.58	442.638	447.321	399.925	0	0	0	0.998082	2.27801	0	VIT_11s0037g00960	[RTKL]	General function prediction only;; Signal transduction mechanisms;; Transcription;; Replication, recombination and repair	Biological Process: polysaccharide biosynthetic process (GO:0000271);; Molecular Function: peptide receptor activity (GO:0001653);; Molecular Function: protein serine/threonine kinase activity (GO:0004674);; Molecular Function: ATP binding (GO:0005524);; Cellular Component: extracellular region (GO:0005576);; Cellular Component: plasma membrane (GO:0005886);; Biological Process: protein phosphory…	--	--	--	--	Protein tyrosine kinase;; Protein kinase domain;; Leucine Rich repeats (2 copies);; Leucine rich repeat;; Leucine rich repeat N-terminal domain;; Leucine Rich repeat;; Leucine Rich Repeat	Probable LRR receptor-like serine/threonine-protein kinase At4g30520 (Precursor) GN=At4g30520 OS=Arabidopsis thaliana (Mouse-ear cress) PE=2 SV=1	T	Signal transduction mechanisms	PREDICTED: probable LRR receptor-like serine/threonine-protein kinase At2g23950-like [Vitis vinifera]	Belongs to the protein kinase superfamily. Ser Thr protein kinase family
XP_003633178.2	LOC100854114	71.4867	78.1485	73.6189	17.3803	7.61518	20.695	13.5005	20.4814	15.14	15.8753	18.2236	18.3895	0	0	0	0	0	0.785707	20.3207	25.8936	29.2312	14.9712	28.8548	21.7926	VIT_11s0037g00980	--	--	--	--	--	--	--	Fasciclin domain	Putative fasciclin-like arabinogalactan protein 20 GN=FLA20 OS=Arabidopsis thaliana (Mouse-ear cress) PE=3 SV=1	R	General function prediction only	PREDICTED: uncharacterized protein LOC100854114 [Vitis vinifera]	Fasciclin-like arabinogalactan protein 20
XP_003634262.1	LOC100262226	959.485	939.643	1025.41	793.09	845.285	761.577	2605.59	2561.31	2686.27	2338.72	2200.5	2375.01	1396.82	1349.31	1415.66	1507.52	1523.63	1504.63	430.32	508.943	513.633	523.993	513.312	507.333	VIT_17s0000g08900	[S]	Function unknown	Biological Process: transition metal ion transport (GO:0000041);; Molecular Function: nucleotide binding (GO:0000166);; Biological Process: response to molecule of bacterial origin (GO:0002237);; Biological Process: regionalization (GO:0003002);; Molecular Function: protein serine/threonine kinase activity (GO:0004674);; Molecular Function: protein binding (GO:0005515);; Molecular Function: ATP b…	--	--	--	--	Leucine Rich repeats (2 copies);; Protein kinase domain;; Leucine rich repeat;; Protein tyrosine kinase;; Leucine Rich Repeat;; Leucine Rich repeat;; Leucine rich repeat N-terminal domain	Probable LRR receptor-like serine/threonine-protein kinase At4g26540 (Precursor) GN=At4g26540 OS=Arabidopsis thaliana (Mouse-ear cress) PE=1 SV=1	T	Signal transduction mechanisms	PREDICTED: probable LRR receptor-like serine/threonine-protein kinase At4g26540-like [Vitis vinifera]	Belongs to the protein kinase superfamily. Ser Thr protein kinase family
XP_010649948.1	LOC100264835	367.486	401.907	432.511	351.265	354.106	406.45	2095.69	2196.06	2102.3	2576.85	2407.8	2333.63	990.892	792.062	824.475	757.592	721.191	829.707	13.1487	7.14306	6.9598	4.99041	6.83404	23.5361	VIT_05s0020g03860	[E]	Amino acid transport and metabolism	Biological Process: RNA splicing, via endonucleolytic cleavage and ligation (GO:0000394);; Cellular Component: cytoplasm (GO:0005737);; Cellular Component: plasma membrane (GO:0005886);; Biological Process: DNA replication (GO:0006260);; Biological Process: DNA methylation (GO:0006306);; Biological Process: cell proliferation (GO:0008283);; Molecular Function: S-adenosylmethionine-homocysteine S-…	K00547|0|vvi:100264835|K00547 homocysteine S-methyltransferase [EC:2.1.1.10] | (RefSeq) homocysteine S-methyltransferase 3	Cysteine and methionine metabolism (ko00270)	[E]	Amino acid transport and metabolism	Homocysteine S-methyltransferase	Homocysteine S-methyltransferase 3 GN=HMT3 OS=Arabidopsis thaliana (Mouse-ear cress) PE=1 SV=2	E	Amino acid transport and metabolism	PREDICTED: homocysteine S-methyltransferase 3 isoform 1 [Vitis vinifera]	Homocysteine s-methyltransferase
XP_010649955.1	LOC100263116	408.814	473.543	448.287	376.878	374.096	309.598	500.556	466.52	506.109	447.394	555.821	540.652	401.824	315.423	319.023	777.17	841.694	865.064	0	0	1.39196	0	1.51867	0	VIT_05s0020g04010	--	--	Cellular Component: anchored component of membrane (GO:0031225);;	--	--	--	--	--	--	S	Function unknown	unnamed protein product [Vitis vinifera]	-
XP_010653204.1	LOC104879973	18.9887	17.6764	46.0118	18.295	22.8455	16.556	31.1549	25.0328	19.4657	14.4321	22.7795	29.4232	0	2.33647	4.98473	1.70245	0.912901	1.57141	910.844	1017.89	967.412	1164.76	1158.75	1101.84	VIT_08s0032g00100	--	--	Biological Process: response to heat (GO:0009408);; Biological Process: response to stimulus (GO:0050896);;	--	--	[O]	Posttranslational modification, protein turnover, chaperones	Hsp20/alpha crystallin family	22.0 kDa heat shock protein (Precursor) GN=HSP22.0 OS=Arabidopsis thaliana (Mouse-ear cress) PE=2 SV=1	O	Posttranslational modification, protein turnover, chaperones	unnamed protein product [Vitis vinifera]	Belongs to the small heat shock protein (HSP20) family
XP_010653207.1	LOC100251316	45.7962	34.4225	31.551	6.40327	16.1823	4.139	11522.1	11438.8	11483.7	14626.9	11349.9	11257.1	1834.18	1496.51	1715.74	1575.62	1608.53	1629.56	619.183	634.839	629.166	2456.28	2495.18	2527.07	VIT_08s0032g00240	[Q]	Secondary metabolites biosynthesis, transport and catabolism	Molecular Function: iron ion binding (GO:0005506);; Molecular Function: electron carrier activity (GO:0009055);; Molecular Function: oxidoreductase activity, acting on paired donors, with incorporation or reduction of molecular oxygen, NAD(P)H as one donor, and incorporation of one atom of oxygen (GO:0016709);; Molecular Function: (S)-limonene 3-monooxygenase activity (GO:0018674);; Molecular Fun…	--	--	[Q]	Secondary metabolites biosynthesis, transport and catabolism	Cytochrome P450	Premnaspirodiene oxygenase GN=CYP71D55 OS=Hyoscyamus muticus (Egyptian henbane) PE=1 SV=1	Q	Secondary metabolites biosynthesis, transport and catabolism	PREDICTED: cytochrome P450 71D10-like [Vitis vinifera]	Belongs to the cytochrome P450 family
XP_010656642.2	LOC104877289	5441.92	5478.77	5287.42	6426.14	6650.91	6605.85	2.07699	1.13785	1.08143	0.721604	0	0.919476	259.682	412.386	422.705	417.101	360.596	376.354	322.74	336.617	246.377	263.494	280.195	246.693	VIT_11s0037g00950	--	--	Molecular Function: adenosylmethionine decarboxylase activity (GO:0004014);; Biological Process: S-adenosylmethioninamine biosynthetic process (GO:0006557);; Biological Process: polyamine biosynthetic process (GO:0006596);; Biological Process: spermine biosynthetic process (GO:0006597);; Biological Process: spermidine biosynthetic process (GO:0008295);; Cellular Component: plastid (GO:0009536);; …	--	--	[T]	Signal transduction mechanisms	Adenosylmethionine decarboxylase	S-adenosylmethionine decarboxylase beta chain (Precursor) OS=Oryza sativa subsp. japonica (Rice) PE=2 SV=1	E	Amino acid transport and metabolism	PREDICTED: LOW QUALITY PROTEIN: S-adenosylmethionine decarboxylase proenzyme-like [Vitis vinifera]	S-adenosylmethionine decarboxylase
XP_010656812.1	LOC100263305	346.264	297.709	327.341	287.232	301.752	279.797	1066.54	977.416	921.378	690.575	830.314	992.115	848.751	884.353	872.328	833.351	821.61	755.065	0	0	0	0	0	0.871706	VIT_11s0052g01570	[V]	Defense mechanisms	Cellular Component: plasma membrane (GO:0005886);; Biological Process: drug transmembrane transport (GO:0006855);; Cellular Component: plant-type vacuole membrane (GO:0009705);; Biological Process: proanthocyanidin biosynthetic process (GO:0010023);; Biological Process: maintenance of seed dormancy (GO:0010231);; Molecular Function: drug transmembrane transporter activity (GO:0015238);; Molecular…	K03327|0|vvi:100263305|K03327 multidrug resistance protein, MATE family | (RefSeq) protein DETOXIFICATION 16	--	[R]	General function prediction only	MatE	MATE efflux family protein 5 GN=F3L12.12 OS=Arabidopsis thaliana (Mouse-ear cress) PE=3 SV=1	S	Function unknown	PREDICTED: MATE efflux family protein 9-like [Vitis vinifera]	Belongs to the multi antimicrobial extrusion (MATE) (TC 2.A.66.1) family
XP_010661380.1	LOC100264963	1415.21	1402.95	1447.4	1052.88	1104.2	1139.05	1217.12	1358.6	1382.07	2773.12	3088.91	3017.72	6103.9	5258.22	5485.2	5200.99	5590.6	5462.24	256.997	255.364	218.538	274.473	268.046	249.308	VIT_15s0021g01880	[K]	Transcription	Cellular Component: histone acetyltransferase complex (GO:0000123);; Molecular Function: transcription regulatory region sequence-specific DNA binding (GO:0000976);; Molecular Function: transcription factor activity, sequence-specific DNA binding (GO:0003700);; Cellular Component: nucleus (GO:0005634);; Biological Process: regulation of transcription, DNA-templated (GO:0006355);; Biological Proce…	K09338|2.03052e-150|vvi:100264963|K09338 homeobox-leucine zipper protein | (RefSeq) homeobox-leucine zipper protein HAT4	--	[K]	Transcription	HD-ZIP protein N terminus;; Homeobox associated leucine zipper;; Homeobox domain	Homeobox-leucine zipper protein HAT3 GN=HAT3 OS=Arabidopsis thaliana (Mouse-ear cress) PE=2 SV=2	K	Transcription	unnamed protein product [Vitis vinifera]	homeobox-leucine zipper protein
XP_010661665.1	LOC100242036	296	295.848	304.993	318.334	318.886	334.432	2307.54	2224.5	2292.63	2874.15	2041.05	1906.99	2804.57	2699.79	3020.75	981.464	964.936	938.92	364.577	389.297	346.598	799.464	834.512	822.89	VIT_15s0048g00330	[MG]	Cell wall/membrane/envelope biogenesis;; Carbohydrate transport and metabolism	Molecular Function: nucleotide binding (GO:0000166);; Molecular Function: protein binding (GO:0005515);; Cellular Component: endosome (GO:0005768);; Cellular Component: Golgi apparatus (GO:0005794);; Cellular Component: trans-Golgi network (GO:0005802);; Biological Process: carbohydrate metabolic process (GO:0005975);; Biological Process: monosaccharide metabolic process (GO:0005996);; Biological…	K08679|0|vvi:100242036|K08679 UDP-glucuronate 4-epimerase [EC:5.1.3.6] | (RefSeq) UDP-glucuronate 4-epimerase 3-like	Starch and sucrose metabolism (ko00500);; Amino sugar and nucleotide sugar metabolism (ko00520)	[M]	Cell wall/membrane/envelope biogenesis	NAD dependent epimerase/dehydratase family;; 3-beta hydroxysteroid dehydrogenase/isomerase family;; RmlD substrate binding domain;; Polysaccharide biosynthesis protein;; Male sterility protein;; short chain dehydrogenase;; NADH(P)-binding	UDP-glucuronate 4-epimerase 3 GN=GAE3 OS=Arabidopsis thaliana (Mouse-ear cress) PE=2 SV=1	G	Carbohydrate transport and metabolism	PREDICTED: UDP-glucuronate 4-epimerase 3-like [Vitis vinifera]	UDP-glucuronate 4-epimerase
XP_010663140.1	LOC100246742	328.392	340.504	379.926	220.455	236.071	212.745	20.7699	18.2056	6.48858	22.3697	3.41693	11.0337	6783.17	7340.01	7135.14	4966.06	5041.95	5075.67	531.923	546.444	576.271	647.755	583.93	588.401	VIT_17s0000g08770	[RTKL]	General function prediction only;; Signal transduction mechanisms;; Transcription;; Replication, recombination and repair	Molecular Function: protein serine/threonine kinase activity (GO:0004674);; Molecular Function: calmodulin binding (GO:0005516);; Molecular Function: ATP binding (GO:0005524);; Cellular Component: plasma membrane (GO:0005886);; Biological Process: protein phosphorylation (GO:0006468);; Biological Process: ion transport (GO:0006811);; Biological Process: defense response (GO:0006952);; Cellular Co…	--	--	--	--	Protein kinase domain;; Protein tyrosine kinase;; Salt stress response/antifungal	Cysteine-rich receptor-like protein kinase 2 (Precursor) GN=CRK2 OS=Arabidopsis thaliana (Mouse-ear cress) PE=2 SV=1	T	Signal transduction mechanisms	unnamed protein product [Vitis vinifera]	Cysteine-rich receptor-like protein kinase
XP_010663154.1	LOC100245004	159.728	138.621	143.294	127.151	116.132	116.72	1097.69	1000.17	1067.37	767.786	982.937	917.637	20.5012	3.5047	18.942	5.95859	0	2.35712	105.189	91.9668	136.412	84.837	114.66	76.7101	VIT_17s0000g08590	--	--	--	--	--	--	--	--	--	S	Function unknown	PREDICTED: uncharacterized protein LOC100245004 [Vitis vinifera]	isoform X1
XP_019075285.1	LOC109122557	122.868	142.342	140.665	74.0949	75.1999	91.0581	0	0	0	0	1.13898	0													VIT_05s0020g03290	[RTKL]	General function prediction only;; Signal transduction mechanisms;; Transcription;; Replication, recombination and repair	Molecular Function: protein kinase activity (GO:0004672);; Molecular Function: protein serine/threonine kinase activity (GO:0004674);; Molecular Function: ATP binding (GO:0005524);; Cellular Component: plasma membrane (GO:0005886);; Biological Process: protein phosphorylation (GO:0006468);; Biological Process: protein N-linked glycosylation (GO:0006487);; Biological Process: signal transduction (…	--	--	--	--	Protein kinase domain;; Protein tyrosine kinase	G-type lectin S-receptor-like serine/threonine-protein kinase RLK1 (Precursor) GN=RLK1 OS=Arabidopsis thaliana (Mouse-ear cress) PE=2 SV=2	T	Signal transduction mechanisms	PREDICTED: G-type lectin S-receptor-like serine/threonine-protein kinase RLK1-like [Vitis vinifera]	G-type lectin S-receptor-like serine threonine-protein kinase
XP_019075495.1	LOC100259658	511.577	547.039	532.423	637.582	587.321	618.367	8.30798	1.13785	9.73287	2.88641	2.27795	7.35581	0	0	0.996946	1.70245	0	0	9005.64	9560.09	9429.13	9006.69	8872.86	8742.34	VIT_05s0020g02970	--	--	Biological Process: obsolete M phase specific microtubule process (GO:0000072);; Biological Process: cytokinesis by cell plate formation (GO:0000911);; Molecular Function: diacylglycerol kinase activity (GO:0004143);; Molecular Function: GTPase activator activity (GO:0005098);; Molecular Function: protein binding (GO:0005515);; Cellular Component: nuclear envelope (GO:0005635);; Cellular Componen…	K14319|0|vvi:100259658|K14319 Ran GTPase-activating protein 1 | (RefSeq) RAN GTPase-activating protein 2	RNA transport (ko03013)	[AYT]	RNA processing and modification;; Nuclear structure;; Signal transduction mechanisms	WPP domain;; Leucine Rich repeat;; Leucine rich repeat;; Leucine Rich repeats (2 copies);; Leucine Rich Repeat	RAN GTPase-activating protein 2 GN=RANGAP2 OS=Arabidopsis thaliana (Mouse-ear cress) PE=1 SV=2	ATY	RNA processing and modification;; Signal transduction mechanisms;; Nuclear structure	PREDICTED: RAN GTPase-activating protein 2 [Vitis vinifera]	RAN GTPase-activating protein
XP_019075822.1	LOC100256307	979.591	1077.33	1038.55	1508.43	1443.08	1525.64	371.782	430.108	394.722	287.92	362.195	399.972	1303.88	1093.47	1072.71	297.078	298.518	230.998	1918.51	1901.84	1859.66	1938.28	2141.33	2118.24	VIT_05s0020g04020	--	--	Cellular Component: nucleus (GO:0005634);; Cellular Component: plasma membrane (GO:0005886);; Biological Process: signal transduction (GO:0007165);; Molecular Function: phosphatidylinositol binding (GO:0035091);;	--	--	--	--	Auxin canalisation;; Plant pleckstrin homology-like region	Formin-like protein 14 GN=FH14 OS=Arabidopsis thaliana (Mouse-ear cress) PE=3 SV=3	S	Function unknown	PREDICTED: uncharacterized protein LOC100256307 [Vitis vinifera]	Plant pleckstrin homology-like region
XP_019079707.1	LOC104881311	6.70188	7.44271	10.517	9.14752	9.51898	9.93361	1.0385	1.13785	8.65144	0	0	0	157.176	267.526	245.249	231.534	248.309	223.927	7.172	3.57153	2.78392	4.99041	8.35271	1.74341	VIT_08s0032g00370	--	--	Biological Process: proteolysis (GO:0006508);; Molecular Function: cysteine-type peptidase activity (GO:0008234);;	--	--	--	--	Ulp1 protease family, C-terminal catalytic domain	--	R	General function prediction only	unnamed protein product [Vitis vinifera]	Seven in absentia protein family
XP_019081864.1	LOC100252799	117.283	122.805	139.35	84.1572	87.5746	67.0519	1343.82	1380.22	1253.38	1542.07	1345.13	1127.28	0	1.16823	0	0	0	0.785707	0	0	1.39196	0	0	0	VIT_17s0053g00700	[M]	Cell wall/membrane/envelope biogenesis	Biological Process: response to hypoxia (GO:0001666);; Cellular Component: cell wall (GO:0005618);; Cellular Component: mitochondrion (GO:0005739);; Biological Process: starch metabolic process (GO:0005982);; Biological Process: sucrose metabolic process (GO:0005985);; Biological Process: sucrose biosynthetic process (GO:0005986);; Biological Process: biosynthetic process (GO:0009058);; Biologica…	K00695|0|vvi:100252799|K00695 sucrose synthase [EC:2.4.1.13] | (RefSeq) sucrose synthase 7	Starch and sucrose metabolism (ko00500)	[M]	Cell wall/membrane/envelope biogenesis	Sucrose synthase;; Glycosyl transferases group 1	Sucrose synthase 6 GN=SUS6 OS=Arabidopsis thaliana (Mouse-ear cress) PE=1 SV=1	M	Cell wall/membrane/envelope biogenesis	unnamed protein product [Vitis vinifera]	Sucrose-cleaving enzyme that provides UDP-glucose and fructose for various metabolic pathways
XP_019081891.1	LOC104882284	528.331	488.428	504.815	86.9015	83.767	123.342	45.6939	47.7898	54.0715	69.2739	33.0303	46.8933													VIT_17s0000g08450	[P]	Inorganic ion transport and metabolism	Molecular Function: carbonate dehydratase activity (GO:0004089);; Molecular Function: zinc ion binding (GO:0008270);; Cellular Component: chloroplast (GO:0009507);; Biological Process: carbon utilization (GO:0015976);;	K01673|1.48911e-159|vvi:100258765|K01673 carbonic anhydrase [EC:4.2.1.1] | (RefSeq) carbonic anhydrase 2	Nitrogen metabolism (ko00910)	[P]	Inorganic ion transport and metabolism	Carbonic anhydrase	Carbonic anhydrase, chloroplastic (Precursor) OS=Nicotiana tabacum (Common tobacco) PE=2 SV=1	P	Inorganic ion transport and metabolism	unnamed protein product [Vitis vinifera]	Reversible hydration of carbon dioxide
XP_019081893.1	LOC100258765	293.766	306.082	286.588	107.026	98.9974	126.654	23.8854	28.4463	33.5243	0	6.83386	0	2.7335	1.16823	0	0.851227	0	0	1730.84	1798.26	1792.84	1134.82	1009.92	1050.41	VIT_17s0000g08460	[P]	Inorganic ion transport and metabolism	Molecular Function: carbonate dehydratase activity (GO:0004089);; Molecular Function: zinc ion binding (GO:0008270);; Cellular Component: chloroplast (GO:0009507);; Biological Process: carbon utilization (GO:0015976);; Molecular Function: lyase activity (GO:0016829);;	K01673|5.29004e-177|vvi:100258765|K01673 carbonic anhydrase [EC:4.2.1.1] | (RefSeq) carbonic anhydrase 2	Nitrogen metabolism (ko00910)	[P]	Inorganic ion transport and metabolism	Carbonic anhydrase	Carbonic anhydrase 2, chloroplastic GN=T9L3_40 OS=Arabidopsis thaliana (Mouse-ear cress) PE=1 SV=2	P	Inorganic ion transport and metabolism	unnamed protein product [Vitis vinifera]	Reversible hydration of carbon dioxide
LOC100265372	XP_002263464.1	Chr17	10195223	A	G	VIT_17s0000g08790	--	--	Cellular Component: chloroplast (GO:0009507);; Biological Process: embryo development ending in seed dormancy (GO:0009793);;	--	--	--	--	--	--	S	Function unknown	PREDICTED: uncharacterized protein LOC100265372 [Vitis vinifera]	isoform X1
LOC100250551	XP_002267438.1	Chr8	7123932	A	T	VIT_08s0105g00190	--	--	Cellular Component: ubiquitin ligase complex (GO:0000151);; Biological Process: MAPK cascade (GO:0000165);; Biological Process: respiratory burst involved in defense response (GO:0002679);; Molecular Function: ubiquitin-protein transferase activity (GO:0004842);; Molecular Function: protein binding (GO:0005515);; Cellular Component: cytosol (GO:0005829);; Biological Process: protein targeting to …	--	--	--	--	U-box domain;; Zinc-finger of the MIZ type in Nse subunit	E3 ubiquitin-protein ligase PUB23 GN=PUB23 OS=Arabidopsis thaliana (Mouse-ear cress) PE=1 SV=1	O	Posttranslational modification, protein turnover, chaperones	PREDICTED: E3 ubiquitin-protein ligase PUB23-like [Vitis vinifera]	RING-type E3 ubiquitin transferase
LOC100241048	XP_002268396.1	Chr11	18248605	C	T	VIT_11s0052g00710	--	--	Molecular Function: RNA binding (GO:0003723);; Molecular Function: RNA-directed DNA polymerase activity (GO:0003964);; Biological Process: RNA-dependent DNA biosynthetic process (GO:0006278);; Cellular Component: chloroplast (GO:0009507);;	--	--	--	--	GDSL/SGNH-like Acyl-Esterase family found in Pmr5 and Cas1p;; PMR5 N terminal Domain	--	S	Function unknown	PREDICTED: uncharacterized protein LOC100241048 [Vitis vinifera]	Protein trichome birefringence-like 5
LOC100253023	XP_002272026.1	Chr15	12372385	C	T	VIT_15s0021g01750	--	--	Biological Process: cell fate specification (GO:0001708);; Molecular Function: DNA binding (GO:0003677);; Molecular Function: transcription factor activity, sequence-specific DNA binding (GO:0003700);; Molecular Function: protein binding (GO:0005515);; Cellular Component: nucleus (GO:0005634);; Biological Process: regulation of transcription, DNA-templated (GO:0006355);; Biological Process: fatty…	--	--	[K]	Transcription	KNOX2 domain;; KNOX1 domain	Homeobox protein knotted-1-like 6 GN=KNAT6 OS=Arabidopsis thaliana (Mouse-ear cress) PE=1 SV=1	K	Transcription	PREDICTED: homeobox protein knotted-1-like 6-like [Vitis vinifera]	DNA binding
LOC100264870	XP_002279339.1	Chr5	5752095	GC	G	VIT_05s0020g04090	[K]	Transcription	Molecular Function: DNA binding (GO:0003677);; Molecular Function: transcription factor activity, sequence-specific DNA binding (GO:0003700);; Molecular Function: protein binding (GO:0005515);; Cellular Component: nucleus (GO:0005634);; Cellular Component: mitochondrion (GO:0005739);; Biological Process: regulation of transcription, DNA-templated (GO:0006355);; Biological Process: protein folding…	K09419|0|vvi:100264870|K09419 heat shock transcription factor, other eukaryote | (RefSeq) heat stress transcription factor A-6b	--	[K]	Transcription	HSF-type DNA-binding	Heat stress transcription factor A-6b GN=MWI23.20 OS=Arabidopsis thaliana (Mouse-ear cress) PE=2 SV=1	K	Transcription	PREDICTED: heat stress transcription factor A-6b [Vitis vinifera]	sequence-specific DNA binding
LOC100242550	XP_002281192.1	Chr5	4684541	C	T	VIT_05s0020g02940	[T]	Signal transduction mechanisms	Biological Process: mitotic cell cycle (GO:0000278);; Molecular Function: protein serine/threonine phosphatase activity (GO:0004722);; Cellular Component: extracellular region (GO:0005576);; Cellular Component: plasma membrane (GO:0005886);; Biological Process: RNA processing (GO:0006396);; Biological Process: protein dephosphorylation (GO:0006470);; Biological Process: signal transduction (GO:00…	K01090|0|vvi:100242550|K01090 protein phosphatase [EC:3.1.3.16] | (RefSeq) protein phosphatase 2C 70	--	[T]	Signal transduction mechanisms	Protein phosphatase 2C;; FHA domain;; Protein phosphatase 2C	Protein phosphatase 2C 70 GN=KAPP OS=Arabidopsis thaliana (Mouse-ear cress) PE=1 SV=2	T	Signal transduction mechanisms	PREDICTED: protein phosphatase 2C 70 [Vitis vinifera]	phosphatase 2C
LOC100264273	XP_003633934.2	Chr15	14297980	T	TGTAC	VIT_15s0048g00190	[P]	Inorganic ion transport and metabolism	Cellular Component: nucleus (GO:0005634);; Biological Process: phosphate ion transport (GO:0006817);; Cellular Component: membrane (GO:0016020);; Biological Process: galactolipid biosynthetic process (GO:0019375);; Biological Process: negative regulation of transcription, DNA-templated (GO:0045892);; Biological Process: cellular response to cold (GO:0070417);; Biological Process: positive regulat…	--	--	[P]	Inorganic ion transport and metabolism	SPX domain	SPX domain-containing protein 3 GN=SPX3 OS=Arabidopsis thaliana (Mouse-ear cress) PE=2 SV=1	P	Inorganic ion transport and metabolism	PREDICTED: SPX domain-containing protein 3-like [Vitis vinifera]	SPX domain-containing protein
LOC100247933	XP_010653229.1	Chr8	4061842	AAG	A	VIT_08s0032g00670	--	--	Biological Process: proteolysis (GO:0006508);; Molecular Function: exopeptidase activity (GO:0008238);; Biological Process: photomorphogenesis (GO:0009640);; Biological Process: embryo development (GO:0009790);; Biological Process: negative regulation of flower development (GO:0009910);; Biological Process: leaf vascular tissue pattern formation (GO:0010305);; Molecular Function: 2-alkenal reduct…	K01301|0|vvi:100247933|K01301 N-acetylated-alpha-linked acidic dipeptidase [EC:3.4.17.21] | (RefSeq) probable glutamate carboxypeptidase 2	--	[OPR]	Posttranslational modification, protein turnover, chaperones;; Inorganic ion transport and metabolism;; General function prediction only	Transferrin receptor-like dimerisation domain;; Peptidase family M28	Probable glutamate carboxypeptidase 2 GN=AMP1 OS=Arabidopsis thaliana (Mouse-ear cress) PE=1 SV=3	OP	Posttranslational modification, protein turnover, chaperones;; Inorganic ion transport and metabolism	unnamed protein product [Vitis vinifera]	Glutamate carboxypeptidase 2
LOC100245349	XP_010661668.1	Chr15	14415047	G	A	VIT_15s0048g00280	[J]	Translation, ribosomal structure and biogenesis	Biological Process: tRNA splicing, via endonucleolytic cleavage and ligation (GO:0006388);; Molecular Function: transferase activity, transferring phosphorus-containing groups (GO:0016772);;	--	--	[J]	Translation, ribosomal structure and biogenesis	RNA 2'-phosphotransferase, Tpt1 / KptA family	--	J	Translation, ribosomal structure and biogenesis	PREDICTED: tRNA 2&apos;-phosphotransferase 1 [Vitis vinifera]	tRNA 2'-phosphotransferase
LOC104882734	XP_019071924.1	Chr18	27400577	C	G	VIT_08s0032g00370	--	--	Biological Process: proteolysis (GO:0006508);; Molecular Function: cysteine-type peptidase activity (GO:0008234);;	--	--	--	--	Ulp1 protease family, C-terminal catalytic domain	--	R	General function prediction only	unnamed protein product [Vitis vinifera]	Seven in absentia protein family
LOC100854913	XP_019077067.1	Chr8	7102261	G	A	VIT_08s0105g00150	[H]	Coenzyme transport and metabolism	Molecular Function: nucleotide binding (GO:0000166);; Cellular Component: mitochondrion (GO:0005739);; Cellular Component: cytosol (GO:0005829);; Biological Process: protein lipidation (GO:0006497);; Biological Process: autophagy (GO:0006914);; Cellular Component: chloroplast (GO:0009507);; Biological Process: phloem or xylem histogenesis (GO:0010087);; Biological Process: leaf senescence (GO:001…	K08337|1.50174e-45|vvi:100251554|K08337 ubiquitin-like modifier-activating enzyme ATG7 | (RefSeq) ubiquitin-like modifier-activating enzyme atg7	Regulation of autophagy (ko04140)	[H]	Coenzyme transport and metabolism	--	Ubiquitin-like modifier-activating enzyme atg7 GN=K15I22.10 OS=Arabidopsis thaliana (Mouse-ear cress) PE=1 SV=1	O	Posttranslational modification, protein turnover, chaperones	hypothetical protein VITISV_023331 [Vitis vinifera]	Ubiquitin-like modifier-activating enzyme atg7
LOC100245349	XP_019081194.1	Chr15	14427324	A	T	VIT_15s0048g00300	[J]	Translation, ribosomal structure and biogenesis	Biological Process: tRNA splicing, via endonucleolytic cleavage and ligation (GO:0006388);; Molecular Function: transferase activity, transferring phosphorus-containing groups (GO:0016772);;	K10669|1.03296e-170|vvi:100245349|K10669 2'-phosphotransferase [EC:2.7.1.160] | (RefSeq) tRNA 2'-phosphotransferase 1	--	[J]	Translation, ribosomal structure and biogenesis	RNA 2'-phosphotransferase, Tpt1 / KptA family	--	J	Translation, ribosomal structure and biogenesis	PREDICTED: tRNA 2&apos;-phosphotransferase 1 [Vitis vinifera]	tRNA 2'-phosphotransferase
